# Supplementary material for: Ligand-controlled Rh( i )-catalyzed intramolecular alkyne sila-cyclization: divergent catalysis and mechanistic studies
Source: Royal Society of Chemistry journal article supplement (doi:10.1039/d4qo02119c), 2024-11-19

## Supporting Information

# Ligand-Controlled Rh(I) -Catalyzed Intramolecular Alkyne Sila-Cyclization: Divergent Catalysis and Mechanistic Studies

Wei-Ke Zhu<sup>a‡</sup>, Jia-Wei Si<sup>a‡</sup>, Sui-Fang Peng<sup>a</sup>, Li Li<sup>a</sup>, Fei Ye<sup>a</sup>, Zheng Xu<sup>\*a</sup>, and Li-Wen Xu<sup>\*a,b</sup>

<sup>a</sup> Key Laboratory of Organosilicon Chemistry and Material Technology of Ministry of Education, and Key Laboratory of Organosilicon Material Technology of Zhejiang Province, College of Material, Chemistry and Chemical Engineering, Hangzhou Normal University, Hangzhou 311121, P. R. China. Email: [liwenxu@hznu.edu.cn](mailto:liwenxu@hznu.edu.cn)

<sup>b</sup> State Key Laboratory for Oxo Synthesis and Selective Oxidation, Suzhou Research Institute (SRI), Lanzhou Institute of Chemical Physics (LICP), Chinese Academy of Sciences (CAS), No.18. Tianshuizhong road, Lanzhou city, 730000, P. R. China

<sup>c</sup> Deqing Third People's Hospital and The Affiliated Hospital of Hangzhou Normal University, Hangzhou Normal University, Hangzhou, 310015, China.

<sup>‡</sup> These authors contributed equally to this work

# Table of Contents

|                                                                                                         |     |
|---------------------------------------------------------------------------------------------------------|-----|
| 1. General Information .....                                                                            | 3   |
| 2. General Procedures for the Synthesis of Silacyclobutanes.....                                        | 4   |
| 3. Rhodium-Catalyzed Ring Expansion of Silacyclobutanes .....                                           | 16  |
| 3.1 Optimization of reaction conditions for the synthesis of silacycle <b>3a</b> by Rh catalysis        | 16  |
| 3.2 General procedure IV for the synthesis of product <b>3</b> .....                                    | 19  |
| 4.5 Optimization of reaction conditions for the synthesis of silacycle <b>4a</b> by Rh catalysis        | 28  |
| 4.6 General procedure VII for the synthesis of product <b>4a</b> .....                                  | 29  |
| 4. DFT Studies.....                                                                                     | 31  |
| 4.1 Computational methods .....                                                                         | 31  |
| 4.2 Energy profiles and energy parameters of Rh-catalyzed intramolecular reaction of <b>1a</b><br>..... | 31  |
| 4.3 Cartesian coordinates of the stationary points .....                                                | 35  |
| 5. References .....                                                                                     | 127 |
| 6. NMR Spectra.....                                                                                     | 128 |

## 1. General Information

Unless specifically stated, all reagents were commercially obtained and where appropriate, purified prior to use. For example, dichloromethane (DCM), acetonitrile (MeCN) was freshly distilled from CaH<sub>2</sub>; Toluene, tetrahydrofuran (THF) and 1,4-dioxane were dried and distilled from metal sodium and benzophenone. Other commercially available reagents and solvents were used directly without purification. Reactions were monitored by thin layer chromatography (TLC) using silica gel plates. Flash column chromatography was performed over silica (200-300 mesh). <sup>1</sup>H, <sup>13</sup>C, <sup>19</sup>F, NMR spectra were recorded on a Bruker 400 MHz or 500 MHz spectrometer in CDCl<sub>3</sub> or C<sub>7</sub>D<sub>8</sub> (Toluene-D<sub>8</sub>). The chemical shifts ( $\delta$ ) were quoted in parts per million (ppm) referenced to TMS (0.00 ppm for <sup>1</sup>H NMR) and CDCl<sub>3</sub> (77.16 ppm for <sup>13</sup>C NMR). Multiplicities were given as: s (singlet); d (doublet); dd (doublets of doublet); t (triplet); q (quartet); td (triplet of doublets) or m (multiplets). Coupling constants, *J*, were reported in Hertz unit (Hz). High resolution mass spectra (HRMS) of the products were obtained on a Bruker Daltonics micro TOF-spectrometer. HPLC was carried out with a Agilent 1260 infinity, Waters AcQuity HPLC or Waters AcQuity UPLC using a chiralcel OD column, a chiralcel OX column, a chiralcel AD column, a chiralcel OJ column, a chiralcel Phenomenex column.

## 2. General Procedures for the Synthesis of Silacyclobutanes

### Procedure A

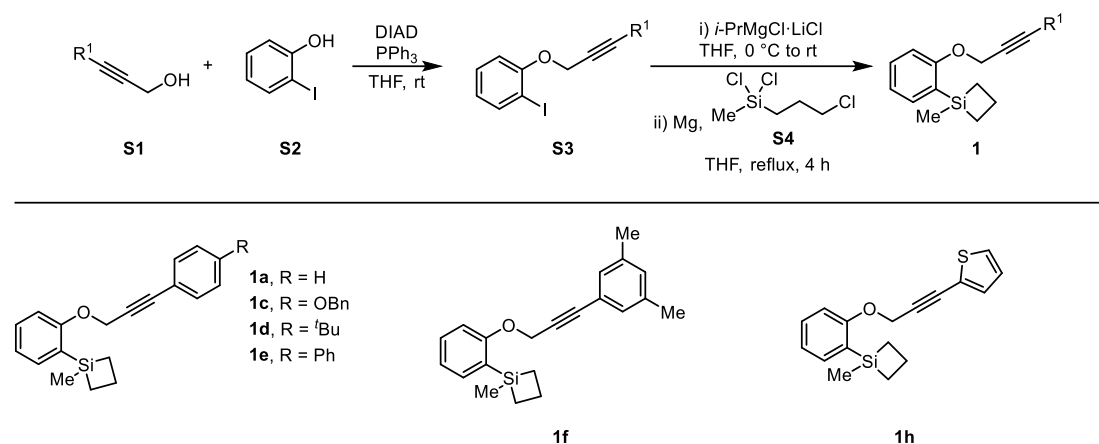

**Step I:** Following a modified literature procedure<sup>[1]</sup>. To a flame-dried flask equipped with a magnetic stir bar and a rubber septum was added 2-iodophenol **S2** (1.0 equiv),  $PPh_3$  (1.1 equiv), propargyl alcohol derivative **S1** (1.0 equiv) and THF (0.5 M). With stirring, DIAD (1.1 equiv) was added dropwise, and then the reaction mixture was stirred overnight at room temperature. Upon completion, the reaction mixture was concentrated under vacuum and directly purified via flash chromatography on silica gel to afford **S3**.

**Step II:** Following a modified literature procedure<sup>[2,3]</sup>.  $i\text{-PrMgCl}\cdot\text{LiCl}$  (1.3 M in THF, 1.3 equiv) was added dropwise to a solution of iodoaryls **S3** (1.0 equiv), in anhydrous THF under  $N_2$  at  $0\text{ }^\circ\text{C}$ , and the reaction mixture was stirred at  $0\text{ }^\circ\text{C}$  for 1 h. Magnesium (1.5 equiv), 5 mL solution of **S4** (1.0 equiv) in THF, and a grain of  $I_2$  in dry THF were heated to initiate the Grignard reaction. The remaining **S4** solution was added dropwise over a period of 1 h, and the resulting solution was refluxed for additional 4 h, and then reaction mixture was cooled to room temperature. To a solution of Grignard reagent derived from **S3** was dropwise added 1-chloro-1-methylsiletane at  $0\text{ }^\circ\text{C}$ , the reaction mixture was allowed to warm to room temperature and stirred overnight. To the mixture was added aq.  $NH_4Cl$  and the mixture was extracted with EtOAc ( $\times 3$ ), the combined EtOAc solution was washed with brine, dried over anhydrous  $Na_2SO_4$  and concentrated in vacuo. The crude product was purified by flash chromatography on silica gel to afford **1**.



## Procedure B

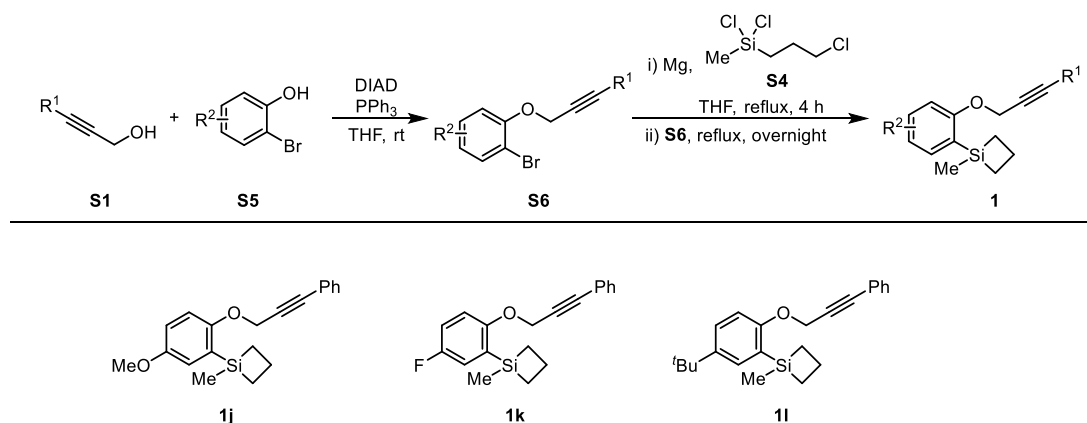

**Step I:** Following a modified literature procedure<sup>[1]</sup>. To a flame-dried flask equipped with a magnetic stir bar and a rubber septum was added 2-bromophenol derivative **S5** (1.0 equiv), PPh<sub>3</sub> (1.1 equiv), propargyl alcohol derivative **S1** (1.0 equiv) and THF (0.5 M). With stirring, DIAD (1.1 equiv) was added dropwise, and then the reaction mixture was stirred overnight at room temperature. Upon completion, the reaction mixture was concentrated under vacuum and directly purified via flash chromatography on silica gel to afford **S6**.

**Step II:** Following a modified literature procedure<sup>[3]</sup>. Magnesium (3.0 equiv), 5 mL solution of **S4** (1.0 equiv) in THF, and a grain of I<sub>2</sub> in dry THF were heated to initiate the Grignard reaction. The remaining **S4** solution was added dropwise over a period of 1 h, and the resulting solution was refluxed for additional 4 h. **S6** (1.5 equiv) was dissolved in THF and then added dropwise over a period of 3 h, followed by refluxing (by oil bath) the resulting solution overnight. The reaction was allowed to cool to room temperature before quenching with aq. NH<sub>4</sub>Cl. The mixture was extracted with EtOAc (× 3). The combined organic layers were then dried over Na<sub>2</sub>SO<sub>4</sub> and concentrated under reduced vacuum. The crude product was purified by silica gel flash column chromatography to afford **1**.



overnight at room temperature. Upon completion, the reaction mixture was concentrated under vacuum and directly purified via flash chromatography on silica gel to afford **1**.

## Procedure D

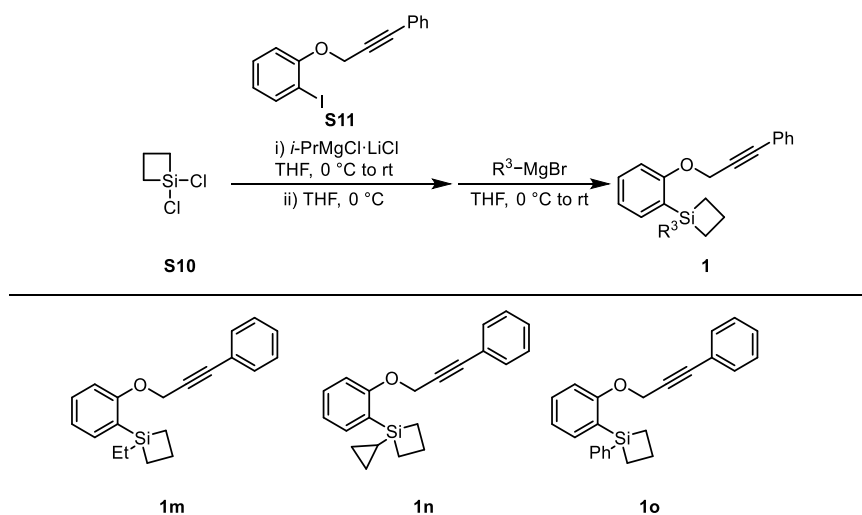

**Step I:** Following a modified literature procedure<sup>[2,3]</sup>, *i*-PrMgCl·LiCl (1.3 M in THF, 1.3 equiv) was added dropwise to a solution of iodoaryls **S11** (1.0 equiv), in anhydrous THF under N<sub>2</sub> at 0 °C, and the reaction mixture was stirred at 0 °C for 1 h. To a solution of the **S10** (1.0 equiv) in THF was dropwised Grignard reagent derived from **S11** at 0 °C, the reaction mixture was stirred at this temperature for 8 h. The Grignard reagent (R-MgBr) (1.0 equiv) was added at 0 °C. The resulting mixture was stirred at room temperature for another 8 h before quenching with aq. NH<sub>4</sub>Cl. The mixture was extracted with EtOAc (× 3). The combined organic layers were then dried over Na<sub>2</sub>SO<sub>4</sub> and concentrated under reduced vacuum. The residue was purified by silica gel flash column chromatography to afford **1**.

## 2-(1-methylsiletan-1-yl)phenol (**S9**)

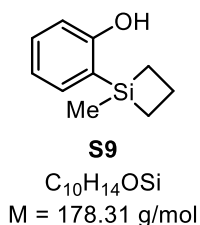

Following the **step II of procedure A**, **S9** was obtained as a colorless oil ( $R_f = 0.4$ , petroleum ether/ethyl acetate = 10:1) in 78% yield (2.49 g, 14.0 mmol). <sup>1</sup>H NMR (500 MHz, CDCl<sub>3</sub>)  $\delta$  7.51 (d,  $J = 7.2$  Hz, 1H), 7.33 (t,  $J = 7.7$  Hz, 1H), 7.03 (t,  $J = 7.3$  Hz, 1H), 6.76 (d,  $J = 8.1$  Hz,

1H), 4.99 (s, 1H), 2.32-2.16 (m, 2H), 1.49-1.36 (m, 2H), 1.30-1.20 (m, 2H), 0.60 (s, 3H). <sup>13</sup>C NMR (100 MHz, CDCl<sub>3</sub>) δ 160.2, 135.3, 131.4, 124.3, 120.8, 114.6, 18.5, 14.3, -0.6. HRMS (ESI, *m/z*) calcd for C<sub>10</sub>H<sub>15</sub>OSi [M+H]<sup>+</sup>: 179.0887, found: 179.0888.

### 1-methyl-1-(2-((3-phenylprop-2-yn-1-yl)oxy)phenyl)siletane (1a)

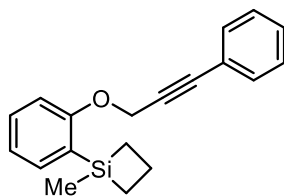

**1a**

C<sub>19</sub>H<sub>20</sub>OSi  
M = 292.45 g/mol

Following the **procedure A**, **1a** was obtained as a colorless oil (*R<sub>f</sub>* = 0.3, petroleum ether) in 59% yield (3.44 g, 11.8 mmol). <sup>1</sup>H NMR (400 MHz, CDCl<sub>3</sub>) δ 7.50 (dd, *J* = 7.6, 2.0 Hz, 1H), 7.44-7.36 (m, 3H), 7.33-7.25 (m, 3H), 7.03 (m, 2H), 4.91 (s, 2H), 2.22-2.08 (m, 2H), 1.48-1.30 (m, 2H), 1.24-1.08 (m, 2H), 0.55 (s, 3H). <sup>13</sup>C NMR (100 MHz, CDCl<sub>3</sub>) δ 162.5, 135.2, 131.9, 131.3, 128.7, 128.4, 127.6, 122.6, 121.4, 111.3, 86.9, 84.3, 56.8, 18.4, 14.5, -0.5. HRMS (ESI, *m/z*) calcd for C<sub>19</sub>H<sub>20</sub>NaOSi [M+Na]<sup>+</sup>: 315.1176, found: 315.1178.

### 1-(2-((3-(4-methoxyphenyl)prop-2-yn-1-yl)oxy)phenyl)-1-methylsiletane (1b)

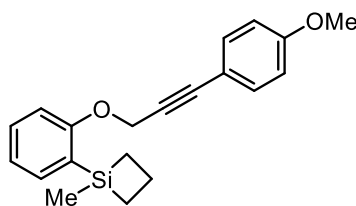

**1b**

C<sub>20</sub>H<sub>22</sub>O<sub>2</sub>Si  
M = 322.48 g/mol

Following the **procedure C**, **1b** was obtained as a pale yellow oil (*R<sub>f</sub>* = 0.4, petroleum ether/ethyl acetate = 50:1) in 40% yield (0.13 g, 0.4 mmol). <sup>1</sup>H NMR (400 MHz, CDCl<sub>3</sub>) δ 7.49 (dd, *J* = 7.2, 1.6 Hz, 1H), 7.44-7.32 (m, 3H), 7.08-7.00 (m, 2H), 6.82 (m, 2H), 4.90 (s, 2H), 3.79 (s, 3H), 2.22-2.09 (m, 2H), 1.42-1.30 (m, 2H), 1.21-1.10 (m, 2H), 0.55 (s, 3H). <sup>13</sup>C NMR (100 MHz, CDCl<sub>3</sub>) δ 162.6, 159.9, 135.2, 133.4, 131.2, 127.5, 121.4, 114.6, 114.0, 111.4, 86.9, 83.0, 56.9, 55.4, 18.4, 14.5, -0.5. HRMS (ESI, *m/z*) calcd for C<sub>20</sub>H<sub>22</sub>NaO<sub>2</sub>Si [M+Na]<sup>+</sup>: 345.1281, found: 345.1278.

### 1-(2-((3-(4-(benzyloxy)phenyl)prop-2-yn-1-yl)oxy)phenyl)-1-methylsiletane (1c)

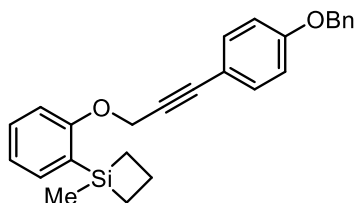

**1c**

$C_{26}H_{26}O_2Si$   
M = 398.58 g/mol

Following the **procedure A**, **1c** was obtained as a white solid ( $R_f = 0.4$ , petroleum ether/ethyl acetate = 50:1) in 37% yield (1.0 g, 2.5 mmol). **M.P.** 42-44 °C.  **$^1H$  NMR (400 MHz,  $CDCl_3$ )**  $\delta$  7.49 (dd,  $J = 7.3, 2.0$  Hz, 1H), 7.41-7.27 (m, 8H), 7.04-6.98 (m, 2H), 6.87 (d,  $J = 8.6$  Hz, 2H), 5.01 (s, 2H), 4.87 (s, 2H), 2.23-2.04 (m, 2H), 1.42-1.29 (m, 2H), 1.23-1.10 (m, 2H), 0.55 (s, 3H).  **$^{13}C$  NMR (100 MHz,  $CDCl_3$ )**  $\delta$  162.6, 159.1, 136.6, 135.1, 133.4, 131.2, 128.7, 128.2, 127.6, 127.5, 121.4, 114.92, 114.89, 111.3, 86.9, 83.0, 70.1, 56.8, 18.4, 14.5, -0.5. **HRMS (ESI,  $m/z$ )** calcd for  $C_{26}H_{26}NaO_2Si$   $[M+Na]^+$ : 421.1594, found: 421.1594.

### 1-(2-((3-(4-(*tert*-butyl)phenyl)prop-2-yn-1-yl)oxy)phenyl)-1-methylsiletane (1d)

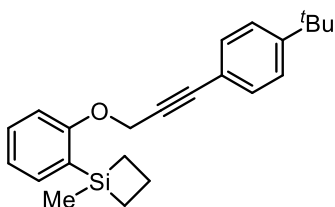

**1d**

$C_{23}H_{28}OSi$   
M = 348.56 g/mol

Following the **procedure A**, **1d** was obtained as a colorless oil ( $R_f = 0.3$ , petroleum ether) in 16% yield (0.47 g, 1.3 mmol).  **$^1H$  NMR (400 MHz,  $CDCl_3$ )**  $\delta$  7.49 (dd,  $J = 7.1, 1.8$  Hz, 1H), 7.43-7.29 (m, 5H), 7.07-7.00 (m, 2H), 4.91 (s, 2H), 2.22-2.08 (m, 2H), 1.41-1.32 (m, 2H), 1.29 (s, 9H), 1.21-1.10 (m, 2H), 0.55 (s, 3H).  **$^{13}C$  NMR (100 MHz,  $CDCl_3$ )**  $\delta$  162.6, 152.0, 135.2, 131.6, 131.2, 127.6, 125.4, 121.4, 119.6, 111.4, 87.1, 83.6, 56.9, 34.9, 31.3, 18.4, 14.5, -0.5. **HRMS (ESI,  $m/z$ )** calcd for  $C_{23}H_{28}NaOSi$   $[M+Na]^+$ : 371.1802, found: 371.1796.

### 1-(2-((3-([1,1'-biphenyl]-4-yl)prop-2-yn-1-yl)oxy)phenyl)-1-methylsiletane (1e)

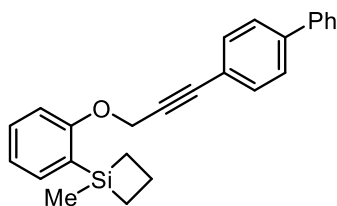

**1e**

$C_{25}H_{24}OSi$   
 M = 368.55 g/mol

Following the **procedure A**, **1e** was obtained as a white solid ( $R_f = 0.2$ , petroleum ether) in 61% yield (1.5 g, 4.1 mmol). **M.P.** 63-65 °C.  $^1H$  NMR (400 MHz,  $CDCl_3$ )  $\delta$  7.60-7.30 (m, 11H), 7.09-7.01 (m, 2H), 4.94 (s, 2H), 2.22-2.10 (m, 2H), 1.42-1.33 (m, 2H), 1.23-1.11 (m, 2H), 0.56 (s, 3H).  $^{13}C$  NMR (100 MHz,  $CDCl_3$ )  $\delta$  162.6, 141.5, 140.4, 135.2, 132.3, 131.3, 129.0, 127.8, 127.6, 127.2, 127.1, 121.5, 121.4, 111.4, 86.8, 85.0, 56.8, 18.4, 14.5, -0.5. **HRMS (ESI,  $m/z$ )** calcd for  $C_{25}H_{24}NaOSi$   $[M+Na]^+$  : 391.1489, found: 391.1489.

**1-(2-((3-(3,5-dimethylphenyl)prop-2-yn-1-yl)oxy)phenyl)-1-methylsiletane (1f)**

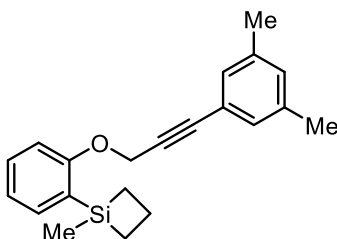

**1f**

$C_{21}H_{24}OSi$   
 M = 320.51 g/mol

Following the **procedure A**, **1f** was obtained as a pale yellow oil ( $R_f = 0.3$ , petroleum ether) in 13% yield (0.34 g, 1.1 mmol).  $^1H$  NMR (400 MHz,  $CDCl_3$ )  $\delta$  7.50 (dd,  $J = 7.1, 1.7$  Hz, 1H), 7.43-7.36 (m, 1H), 7.08-7.00 (m, 4H), 6.94 (s, 1H), 4.90 (s, 2H), 2.26 (s, 6H), 2.22-2.08 (m, 2H), 1.43-1.31 (m, 2H), 1.21-1.09 (m, 2H), 0.55 (s, 3H).  $^{13}C$  NMR (100 MHz,  $CDCl_3$ )  $\delta$  162.6, 138.0, 135.2, 131.3, 130.6, 129.5, 127.5, 122.2, 121.4, 111.3, 87.3, 83.6, 56.8, 21.2, 18.4, 14.5, -0.5. **HRMS (ESI,  $m/z$ )** calcd for  $C_{21}H_{24}NaOSi$   $[M+Na]^+$  : 343.1489, found: 343.1489.

**1-(2-((3-(benzo[d][1,3]dioxol-5-yl)prop-2-yn-1-yl)oxy)phenyl)-1-methylsiletane (1g)**

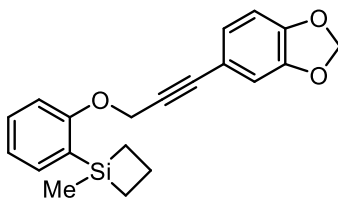

**1g**

$C_{20}H_{20}O_3Si$   
 M = 336.46 g/mol

Following the **procedure C**, **1g** was obtained as a colorless oil ( $R_f = 0.2$ , petroleum ether/ethyl acetate = 50:1) in 37% yield (0.25 g, 0.74 mmol).  $^1H$  NMR (400 MHz,  $CDCl_3$ )  $\delta$  7.49 (dd,  $J = 7.4, 1.8$  Hz, 1H), 7.39 (td,  $J = 8.0, 2.0$  Hz, 1H), 7.03 (dd,  $J = 7.8, 5.8$  Hz, 2H), 6.94 (dd,  $J = 8.0, 1.6$  Hz, 1H), 6.86 (d,  $J = 1.6$  Hz, 1H), 6.73 (d,  $J = 8.0$  Hz, 1H), 5.95 (s, 2H), 4.89 (s, 2H), 2.22-2.08 (m, 1H), 1.43-1.29 (m, 2H), 1.23-1.09 (m, 2H), 0.54 (s, 3H).  $^{13}C$  NMR (100 MHz,  $CDCl_3$ )  $\delta$  162.6, 148.2, 147.5, 135.2, 131.2, 127.6, 126.6, 121.4, 115.8, 111.9, 111.3, 108.5, 101.5, 86.8, 82.7, 56.8, 18.6, 14.5, -0.5. HRMS (ESI,  $m/z$ ) calcd for  $C_{20}H_{20}NaO_3Si$   $[M+Na]^+$ : 359.1074, found: 359.1069.

### 1-methyl-1-(2-((3-(thiophen-2-yl)prop-2-yn-1-yl)oxy)phenyl)siletane (1h)

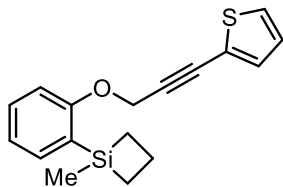

**1h**

$C_{17}H_{18}OSSi$   
 M = 298.48 g/mol

Following the **procedure A**, **1h** was obtained as a yellow oil ( $R_f = 0.3$ , petroleum ether) in 25% yield (0.73 g, 2.4 mmol).  $^1H$  NMR (400 MHz,  $CDCl_3$ )  $\delta$  7.43 (dd,  $J = 7.1, 1.8$  Hz, 1H), 7.33 (td,  $J = 7.8, 1.8$  Hz, 1H), 7.18 (dd,  $J = 5.0, 1.2$  Hz, 1H), 7.14 (dd,  $J = 3.6, 1.0$  Hz, 1H), 7.00-6.93 (m, 2H), 6.89 (dd,  $J = 5.1, 3.6$  Hz, 1H), 4.86 (s, 2H), 2.15-1.99 (m, 2H), 1.33-1.23 (m, 2H), 1.14-1.04 (m, 2H), 0.47 (s, 3H).  $^{13}C$  NMR (100 MHz,  $CDCl_3$ )  $\delta$  162.5, 135.2, 132.8, 131.3, 127.7, 127.6, 127.1, 122.4, 121.5, 111.3, 88.3, 80.3, 56.8, 18.4, 14.5, -0.5. HRMS (ESI,  $m/z$ ) calcd for  $C_{17}H_{18}NaOSSi$   $[M+Na]^+$ : 321.0740, found: 321.0750.

### 1-(2-(hept-2-yn-1-yloxy)phenyl)-1-methylsiletane (1i)

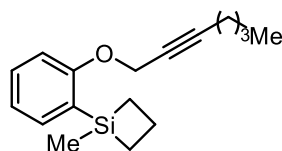

**1i**

$C_{17}H_{24}OSi$   
 $M = 272.46 \text{ g/mol}$

Following the **procedure C**, **1i** was obtained as a colorless oil ( $R_f = 0.35$ , petroleum ether) in 22% yield (0.12 g, 0.44 mmol).  $^1H$  NMR (400 MHz,  $CDCl_3$ ):  $\delta$  7.48 (dd,  $J = 7.2, 2.0$  Hz, 1H), 7.37 (td,  $J = 7.8, 1.8$  Hz, 1H), 7.01 (t,  $J = 7.4$  Hz, 1H), 6.96 (d,  $J = 8.0$  Hz, 1H), 4.67 (s, 2H), 2.25-2.07 (m, 4H), 1.52-1.42 (m, 2H), 1.43-1.27 (m, 4H), 1.21-1.08 (m, 2H), 0.88 (t,  $J = 7.4$  Hz, 3H), 0.52 (s, 3H).  $^{13}C$  NMR (100 MHz,  $CDCl_3$ ):  $\delta$  162.6, 135.1, 131.2, 127.4, 121.2, 111.3, 88.0, 75.3, 56.6, 30.6, 21.9, 18.6, 18.3, 14.5, 13.7, -0.5. HRMS (ESI,  $m/z$ ): calcd for  $C_{17}H_{24}NaOSi$   $[M+Na]^+$ : 295.1489, found: 295.1485.

#### 1-(5-methoxy-2-((3-phenylprop-2-yn-1-yl)oxy)phenyl)-1-methylsiletane (**1j**)

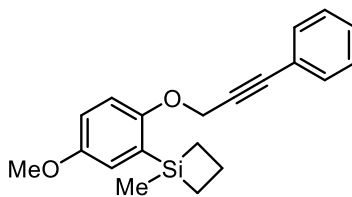

**1j**

$C_{20}H_{22}O_2Si$   
 $M = 322.48 \text{ g/mol}$

Following the **procedure B**, **1j** was obtained as a yellow oil ( $R_f = 0.4$ , petroleum ether/ethyl acetate = 50:1) in 14% yield (0.45 g, 1.4 mmol).  $^1H$  NMR (400 MHz,  $CDCl_3$ )  $\delta$  7.45-7.37 (m, 2H), 7.33-7.25 (m, 3H), 7.05 (d,  $J = 3.2$  Hz, 1H), 7.00 (d,  $J = 8.8$  Hz, 1H), 6.90 (dd,  $J = 8.9, 3.1$  Hz, 1H), 4.86 (s, 2H), 3.79 (s, 3H), 2.24-2.09 (m, 2H), 1.42-1.30 (m, 2H), 1.23-1.11 (m, 2H), 0.55 (s, 3H).  $^{13}C$  NMR (100 MHz,  $CDCl_3$ )  $\delta$  156.7, 154.3, 131.9, 129.2, 128.7, 128.4, 122.6, 120.7, 115.4, 112.9, 86.8, 84.6, 57.6, 55.9, 18.3, 14.6, -0.5. HRMS (ESI,  $m/z$ ): calcd for  $C_{20}H_{22}NaO_2Si$   $[M+Na]^+$ : 345.1281, found: 345.1276.

#### 1-(5-fluoro-2-((3-phenylprop-2-yn-1-yl)oxy)phenyl)-1-methylsiletane (**1k**)



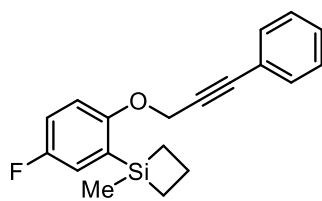

**1k**

$C_{19}H_{19}FOSi$   
 $M = 310.44$  g/mol

Following the **procedure B**, **1k** was obtained as a pale yellow oil ( $R_f = 0.3$ , petroleum ether) in 14% yield (0.43 g, 1.4 mmol).  $^1H$  NMR (400 MHz,  $CDCl_3$ )  $\delta$  7.41 (dd,  $J = 6.8, 2.4$  Hz, 2H), 7.35-7.25 (m, 3H), 7.17 (dd,  $J = 8.0, 3.1$  Hz, 1H), 7.05 (td,  $J = 8.4, 3.1$  Hz, 1H), 6.98 (dd,  $J = 8.9, 3.9$  Hz, 1H), 4.88 (s, 2H), 2.22-2.06 (m, 2H), 1.40-1.29 (m, 2H), 1.23-1.12 (m, 2H), 0.55 (s, 3H).  $^{13}C$  NMR (100 MHz,  $CDCl_3$ )  $\delta$  158.3 (d,  $J = 1.7$  Hz), 157.8 (d,  $J = 240.0$  Hz), 131.9, 130.1 (d,  $J = 4.0$  Hz), 128.8, 128.4, 122.4, 121.2 (d,  $J = 20.9$  Hz), 117.1 (d,  $J = 23.3$  Hz), 112.7 (d,  $J = 7.1$  Hz), 87.1, 84.1, 57.5, 18.3, 14.4, -0.6.  $^{19}F$  NMR (471 MHz,  $CDCl_3$ )  $\delta$  -123.6 (s). HRMS (ESI,  $m/z$ ): calcd for  $C_{19}H_{19}FNaOSi$   $[M+Na]^+$  : 333.1081, found: 333.1068.

**1-(5-(tert-butyl)-2-((3-phenylprop-2-yn-1-yl)oxy)phenyl)-1-methylsiletane (1l)**

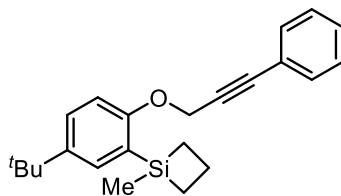

**1l**

$C_{23}H_{28}OSi$   
 $M = 348.56$  g/mol

Following the **procedure B**, **1l** was obtained as a pale yellow oil ( $R_f = 0.3$ , petroleum ether) in 14% yield (0.49 g, 1.4 mmol).  $^1H$  NMR (400 MHz,  $CDCl_3$ )  $\delta$  7.60 (d,  $J = 2.5$  Hz, 1H), 7.53-7.47 (m, 3H), 7.40-7.35 (m, 3H), 7.07 (d,  $J = 8.6$  Hz, 1H), 4.97 (s, 2H), 2.32-2.19 (m, 2H), 1.54-1.43 (m, 2H), 1.41 (s, 9H), 1.32-1.19 (m, 2H), 0.65 (s, 3H).  $^{13}C$  NMR (100 MHz,  $CDCl_3$ )  $\delta$  160.5, 143.7, 132.0, 131.9, 128.7, 128.4, 128.0, 126.7, 122.6, 110.8, 86.8, 84.6, 56.9, 34.4, 31.7, 18.4, 14.6, -0.5. HRMS (ESI,  $m/z$ ) calcd for  $C_{23}H_{28}NaOSi$   $[M+Na]^+$  : 371.1802, found: 371.1803.

### 1-ethyl-1-(2-((3-phenylprop-2-yn-1-yl)oxy)phenyl)siletane (1m)

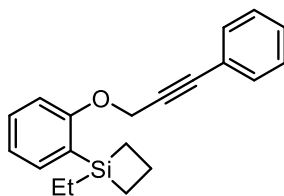

**1m**

$C_{20}H_{22}OSi$   
M = 306.48 g/mol

Following the **procedure D**, **1m** was obtained as a colorless oil ( $R_f = 0.3$ , petroleum ether) in 13% yield (0.39 g, 1.3 mmol).  $^1H$  NMR (400 MHz,  $CDCl_3$ )  $\delta$  7.49 (dd,  $J = 7.3, 1.9$  Hz, 1H), 7.43-7.36 (m, 3H), 7.34-7.26 (m, 3H), 7.08-7.00 (m, 2H), 4.90 (s, 2H), 2.21-2.05 (m, 2H), 1.38-1.17 (m, 4H), 1.10-0.95 (m, 5H).  $^{13}C$  NMR (100 MHz,  $CDCl_3$ )  $\delta$  162.5, 135.5, 131.9, 131.1, 128.7, 128.4, 126.8, 122.6, 121.4, 111.2, 86.9, 84.3, 56.7, 18.6, 12.7, 7.7, 7.6. HRMS (ESI,  $m/z$ ) calcd for  $C_{20}H_{22}NaOSi$   $[M+Na]^+$ : 329.1332, found: 329.1330.

### 1-cyclopropyl-1-(2-((3-phenylprop-2-yn-1-yl)oxy)phenyl)siletane (1n)

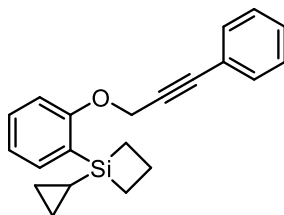

**1n**

$C_{21}H_{22}OSi$   
M = 318.49 g/mol

Following the **procedure D**, **1n** was obtained as a colorless oil ( $R_f = 0.3$ , petroleum ether) in 25% yield (0.79 g, 2.5 mmol).  $^1H$  NMR (400 MHz,  $CDCl_3$ )  $\delta$  7.54 (dd,  $J = 7.5, 1.8$  Hz, 1H), 7.44-7.37 (m, 3H), 7.34-7.26 (m, 3H), 7.03 (t,  $J = 7.2$  Hz, 2H), 4.92 (s, 2H), 2.20-1.96 (m, 2H), 1.36-1.23 (m, 2H), 1.18-1.07 (m, 2H), 0.77-0.61 (m, 2H), 0.49-0.36 (m, 2H), 0.11-0.01 (m, 1H).  $^{13}C$  NMR (100 MHz,  $CDCl_3$ )  $\delta$  162.6, 135.6, 131.9, 131.3, 128.7, 128.4, 126.4, 122.6, 121.4, 111.2, 86.9, 84.3, 77.5, 18.4, 12.5, 2.0, -5.0. HRMS (ESI,  $m/z$ ) calcd for  $C_{21}H_{22}NaOSi$   $[M+Na]^+$ : 341.1332, found: 341.1332.

### 1-phenyl-1-(2-((3-phenylprop-2-yn-1-yl)oxy)phenyl)siletane (1o)

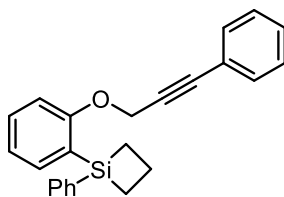

**1o**

$C_{24}H_{22}OSi$

M = 354.52 g/mol

Following the **procedure D**, **1o** was obtained as a white solid ( $R_f = 0.2$ , petroleum ether) in 27% yield (0.95 g, 2.7 mmol). **M.P.** 78-80 °C.  **$^1H$  NMR (400 MHz,  $CDCl_3$ )**  $\delta$  7.70-7.64 (m, 2H), 7.49 (dd,  $J = 7.1, 1.8$  Hz, 1H), 7.45-7.37 (m, 3H), 7.37-7.27 (m, 6H), 7.09-7.01 (m, 2H), 4.84 (s, 2H), 2.39-2.09 (m, 2H), 1.67-1.37 (m, 4H).  **$^{13}C$  NMR (100 MHz,  $CDCl_3$ )**  $\delta$  162.7, 137.6, 136.0, 134.4, 131.9, 131.7, 129.4, 128.7, 128.4, 127.8, 125.5, 122.6, 121.6, 111.5, 87.0, 84.2, 56.7, 18.6, 14.2. **HRMS (ESI,  $m/z$ )** calcd for  $C_{24}H_{22}NaOSi$   $[M+Na]^+$ : 377.1332, found: 377.1332.

### 3. Rhodium-Catalyzed Ring Expansion of Silacyclobutanes

#### 3.1 Optimization of reaction conditions for the synthesis of silacycle 3a by Rh catalysis

Table S1. Evaluation of ligand in the reaction<sup>a</sup>

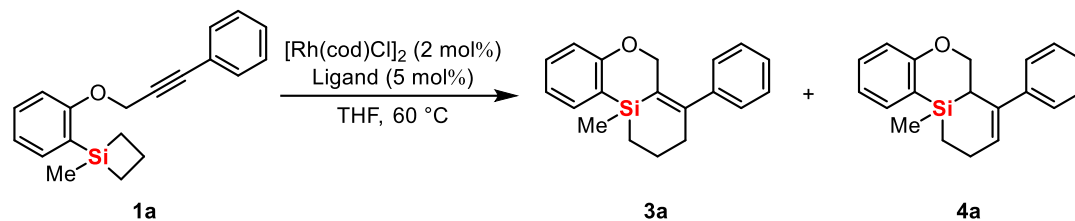

| Entry | Ligand | Yield of 3a+4a (%) <sup>b</sup> | 3a:4a (%) <sup>c</sup> |
|-------|--------|---------------------------------|------------------------|
| 1     | L1     | 83                              | >99:1                  |
| 2     | L2     | trace                           | -                      |
| 3     | L3     | trace                           | -                      |
| 4     | L4     | trace                           | -                      |
| 5     | L5     | trace                           | -                      |
| 6     | L6     | trace                           | -                      |
| 7     | L7     | 38                              | 2:1                    |
| 8     | L8     | 18                              | 10:1                   |
| 9     | L9     | 24                              | 1:4                    |
| 10    | L10    | 43                              | 10:1                   |
| 11    | L11    | 30                              | 1:1                    |
| 12    | L12    | 25                              | 1:10                   |
| 13    | L13    | 41                              | >25:1                  |
| 14    | L14    | 39                              | >25:1                  |
| 15    | L15    | 23                              | 19:1                   |
| 16    | L16    | 28                              | 10:1                   |

<sup>a</sup> All the reactions were carried out by using **1a** (0.1 mmol),  $[\text{Rh}(\text{cod})\text{Cl}]_2$  (2 mol%), Ligand (5 mol%) in THF (0.1 M) for 12 h under an  $\text{N}_2$  atmosphere. <sup>b</sup> Isolated yield. <sup>c</sup> Determined by  $^1\text{H}$  NMR analysis.

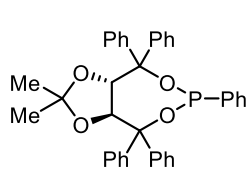

**L1**

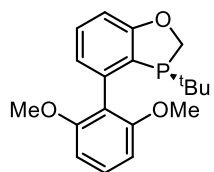

**L2**

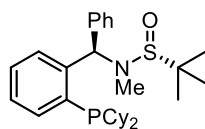

**L3**

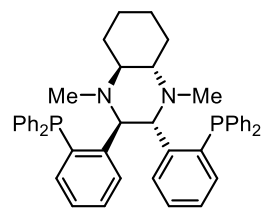

**L4**

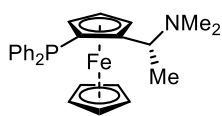

**L5**

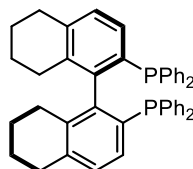

**L6**

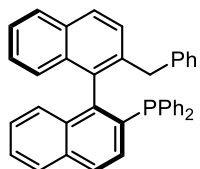

**L7**

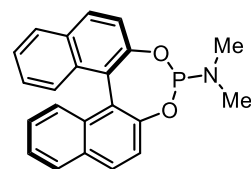

**L8**

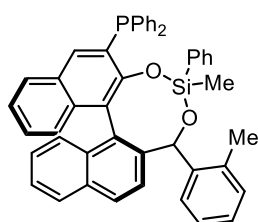

**L9**

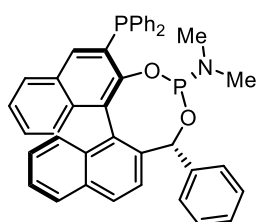

**L10**

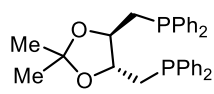

**L11**

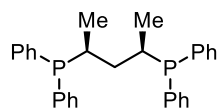

**L12**

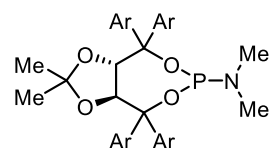

**L13**, Ar = Ph

**L14**, Ar = 3,5-(<sup>t</sup>Bu)<sub>2</sub>C<sub>6</sub>H<sub>3</sub>

**L15**, Ar = 4-OMeC<sub>6</sub>H<sub>4</sub>

**L16**, Ar = 4-CF<sub>3</sub>C<sub>6</sub>H<sub>4</sub>

**Table S2. Evaluation of other conditions in the reaction<sup>a</sup>**

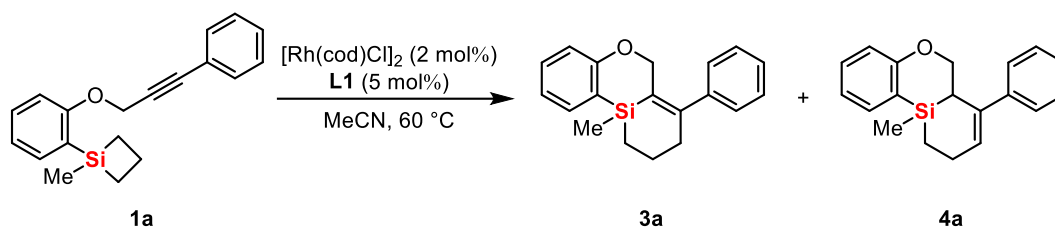

| Entry | variation from “standard conditions” <sup>a</sup>                                    | Yield of <b>3a+4a</b> (%) <sup>b</sup> | <b>3a:4a</b> (%) <sup>c</sup> |
|-------|--------------------------------------------------------------------------------------|----------------------------------------|-------------------------------|
| 1     | none                                                                                 | 93                                     | >99:1                         |
| 2     | $[\text{Rh}(\text{OAc})_2]_2$ instead of $[\text{Rh}(\text{cod})\text{Cl}]_2$        | trace                                  | -                             |
| 3     | $\text{Rh}(\text{cod})\text{BF}_4$ instead of $[\text{Rh}(\text{cod})\text{Cl}]_2$   | trace                                  | -                             |
| 4     | $[\text{Rh}(\text{cod})\text{OH}]_2$ instead of $[\text{Rh}(\text{cod})\text{Cl}]_2$ | trace                                  | -                             |
| 5     | THF instead of MeCN                                                                  | 83                                     | >99:1                         |
| 6     | toluene instead of MeCN                                                              | 83                                     | >50:1                         |
| 7     | DCE instead of MeCN                                                                  | 68                                     | >99:1                         |
| 8     | 1,4-dioxane instead of MeCN                                                          | 81                                     | >15:1                         |
| 9     | 40 °C instead of 60 °C                                                               | 27                                     | >99:1                         |
| 10    | Room temperature instead of 60 °C                                                    | trace                                  | -                             |

<sup>a</sup> All the reactions were carried out by using **1a** (0.1 mmol),  $[\text{Rh}(\text{cod})\text{Cl}]_2$  (2 mol%), **L1** (5 mol%) in solvent (0.1 M) for 12 h under an  $\text{N}_2$  atmosphere, and for entries 2-4, with the solvent is THF. <sup>b</sup> Isolated yield. <sup>c</sup> Determined by crude  $^1\text{H}$  NMR analysis.

### 3.2 General Procedure IV for the Synthesis of Product 3

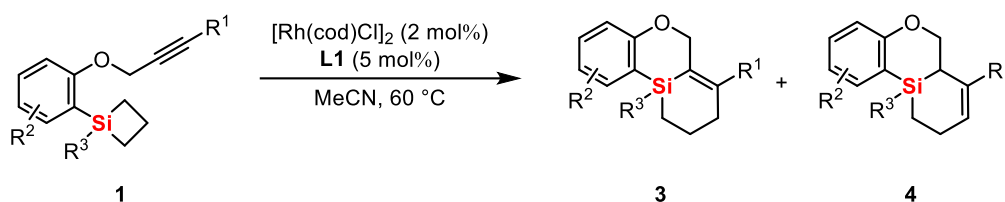

To a flame-dried Schlenk tube equipped with a septum and a magnetic stir bar, [Rh(cod)Cl]<sub>2</sub> (1.0 mg, 0.002 mmol, 2.0 mol%) and L1 (2.9 mg, 0.005 mmol, 5.0 mol%) were added. The tube was evacuated under high vacuum and backfilled with nitrogen gas (3 times). MeCN (1.0 mL) was added to the tube, and then silacyclobutanes 1 (SCBs) (0.1 mmol, 1.0 equiv, 0.1 M) was successively added dropwise. The reaction tube was stirred at 60 °C for 6 h. After removing the solvent under vacuum, the residues were purified by flash chromatography on silica gel to yield the target product 3.

#### 11-methyl-7-phenyl-8,9,10,11-tetrahydro-6H-benzo[b]silino[1,2-d][1,4]oxasiline (3a)

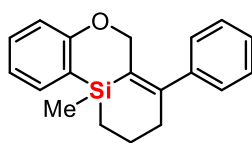

3a

C<sub>19</sub>H<sub>20</sub>OSi  
M = 292.45 g/mol

Following the **general procedure IV**, the reaction was carried out with SCBs **1a** (0.1 mmol), [Rh(cod)Cl]<sub>2</sub> (1.0 mg, 0.002 mmol), L1 (2.9 mg, 0.005 mmol) and MeCN (1.0 mL) at 60 °C for 6 h. The title compound was obtained in 93% yield (27.1 mg) as colorless oil. <sup>1</sup>H NMR (400 MHz, CDCl<sub>3</sub>) δ 7.39-7.33 (m, 3H), 7.30-7.25 (m, 2H), 7.22-7.17 (m, 2H), 6.97 (td, *J* = 7.2, 1.0 Hz, 1H), 6.86 (d, *J* = 8.3 Hz, 1H), 4.69 (d, *J* = 12.0 Hz, 1H), 4.49 (dt, *J* = 12.0, 1.6 Hz, 1H), 2.64-2.53 (m, 1H), 2.48-2.36 (m, 1H), 2.22-2.10 (m, 1H), 1.99-1.80 (m, 1H), 1.15-1.06 (m, 1H), 0.75 (td, *J* = 13.6, 3.6 Hz, 1H), 0.45 (s, 3H). <sup>13</sup>C NMR (100 MHz, CDCl<sub>3</sub>) δ 163.9, 155.4, 141.8, 134.9, 131.1, 128.3, 127.8, 127.3, 127.2, 121.9, 121.0, 118.2, 68.8, 37.1, 20.8, 9.3, -2.4. HRMS (ESI, *m/z*) calcd for C<sub>19</sub>H<sub>20</sub>NaOSi [M+Na]<sup>+</sup>: 315.1176, found: 315.1178.

#### 7-(4-methoxyphenyl)-11-methyl-8,9,10,11-tetrahydro-6H-benzo[b]silino[1,2-d][1,4]oxasiline (3b)

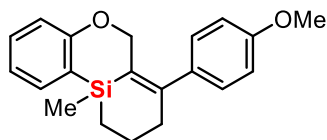

**3b**

$C_{20}H_{22}O_2Si$   
M = 322.48 g/mol

Following the **general procedure IV**, the reaction was carried out with SCBs **1b** (0.1 mmol),  $[Rh(cod)Cl]_2$  (1.0 mg, 0.002 mmol), **L1** (2.9 mg, 0.005 mmol) and MeCN (1.0 mL) at 60 °C for 6 h. The title compound was obtained in 97% yield (31.3 mg) as pale yellow oil.  $^1H$  NMR (400 MHz,  $CDCl_3$ )  $\delta$  7.29 (dd,  $J = 7.2, 1.8$  Hz, 1H), 7.23-7.17 (m, 1H), 7.10-7.05 (m, 2H), 6.89 (td,  $J = 7.2, 1.0$  Hz, 1H), 6.84-6.76 (m, 3H), 4.66 (d,  $J = 11.9$  Hz, 1H), 4.42 (dt,  $J = 11.9, 1.5$  Hz, 1H), 3.74 (s, 3H), 2.57-2.46 (m, 1H), 2.37-2.26 (m, 1H), 2.13-2.02 (m, 1H), 1.87-1.73 (m, 1H), 1.05-0.96 (m, 1H), 0.65 (td,  $J = 13.6, 3.6$  Hz, 1H), 0.37 (s, 3H).  $^{13}C$  NMR (100 MHz,  $CDCl_3$ )  $\delta$  163.9, 158.8, 155.0, 134.9, 134.1, 131.1, 129.0, 126.6, 121.9, 121.0, 118.2, 113.6, 68.8, 55.4, 37.2, 20.8, 9.3, -2.4. HRMS (ESI,  $m/z$ ) calcd for  $C_{20}H_{22}NaO_2Si$   $[M+Na]^+$ : 345.1281, found: 345.1285.

**7-(4-(benzyloxy)phenyl)-11-methyl-8,9,10,11-tetrahydro-6H-benzo[b]silino[1,2-d][1,4]oxa siline (3c)**

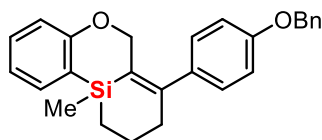

**3c**

$C_{26}H_{26}O_2Si$   
M = 398.58 g/mol

Following the **general procedure IV**, the reaction was carried out with SCBs **1c** (0.1 mmol),  $[Rh(cod)Cl]_2$  (1.0 mg, 0.002 mmol), **L1** (2.9 mg, 0.005 mmol) and MeCN (1.0 mL) at 60 °C for 6 h. The title compound was obtained in 93% yield (37.0 mg) as white solid. **M.P.** 114-116 °C.  $^1H$  NMR (400 MHz,  $CDCl_3$ )  $\delta$  7.38-7.22 (m, 6H), 7.22-7.16 (m, 1H), 7.07 (d,  $J = 8.7$  Hz, 2H), 6.91-6.85 (m, 3H), 6.78 (d,  $J = 8.4$  Hz, 1H), 4.98 (s, 2H), 4.67 (d,  $J = 11.9$  Hz, 1H), 4.41 (d,  $J = 11.8$  Hz, 1H), 2.56-2.45 (m, 1H), 2.38-2.24 (m, 1H), 2.12-2.01 (m, 1H), 1.87-1.71 (m, 1H), 1.05-0.94 (m, 1H), 0.64 (td,  $J = 13.6, 3.6$  Hz, 1H), 0.36 (s, 3H).  $^{13}C$  NMR



(100 MHz, CDCl<sub>3</sub>)  $\delta$  163.9, 158.1, 155.0, 137.1, 134.9, 134.4, 131.1, 129.1, 128.7, 128.1, 127.6, 126.7, 121.9, 121.0, 118.2, 114.5, 70.1, 68.8, 37.2, 20.8, 9.3, -2.4. HRMS (ESI,  $m/z$ ) calcd for C<sub>26</sub>H<sub>26</sub>NaO<sub>2</sub>Si [M+Na]<sup>+</sup>: 421.1594, found: 421.1592.

**7-(4-(*tert*-butyl)phenyl)-11-methyl-8,9,10,11-tetrahydro-6*H*-benzo[*b*]silino[1,2-*d*][1,4]oxasiline (3d)**

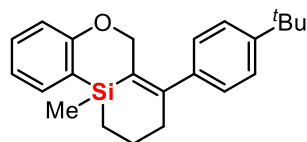

**3d**  
C<sub>23</sub>H<sub>28</sub>OSi  
M = 348.56 g/mol

Following the **general procedure IV**, the reaction was carried out with SCBs **1d** (0.1 mmol), [Rh(cod)Cl]<sub>2</sub> (1.0 mg, 0.002 mmol), **L1** (2.9 mg, 0.005 mmol) and MeCN (1.0 mL) at 60 °C for 6 h. The title compound was obtained in 88% yield (30.8 mg) as colorless oil. <sup>1</sup>H NMR (400 MHz, CDCl<sub>3</sub>)  $\delta$  7.40-7.33 (m, 3H), 7.32-7.22 (m, 1H), 7.17-7.10 (m, 2H), 6.96 (td, *J* = 7.2, 1.0 Hz, 1H), 6.86 (dd, *J* = 8.2, 1.0 Hz, 1H), 4.75 (d, *J* = 11.9 Hz, 1H), 4.49 (dt, *J* = 11.8, 1.5 Hz, 1H), 2.66-2.54 (m, 1H), 2.48-2.37 (m, 1H), 2.22-2.09 (m, 1H), 1.96-1.80 (m, 1H), 1.33 (s, 9H), 1.14-1.04 (m, 1H), 0.74 (td, *J* = 13.6, 3.6 Hz, 1H), 0.45 (s, 3H). <sup>13</sup>C NMR (100 MHz, CDCl<sub>3</sub>)  $\delta$  163.9, 155.5, 150.1, 138.8, 134.9, 131.1, 127.5, 126.8, 125.2, 121.9, 121.0, 118.2, 68.8, 37.1, 34.7, 31.5, 20.9, 9.3, -2.3. HRMS (ESI,  $m/z$ ) calcd for C<sub>23</sub>H<sub>28</sub>NaOSi [M+Na]<sup>+</sup>: 371.1802, found: 371.1800.

**7-([1,1'-biphenyl]-4-yl)-11-methyl-8,9,10,11-tetrahydro-6*H*-benzo[*b*]silino[1,2-*d*][1,4]oxasiline (3e)**

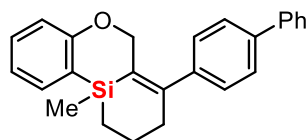

**3e**  
C<sub>25</sub>H<sub>24</sub>OSi  
M = 368.55 g/mol

Following the **general procedure IV**, the reaction was carried out with SCBs **1e** (0.1 mmol),  $[\text{Rh}(\text{cod})\text{Cl}]_2$  (1.0 mg, 0.002 mmol), **L1** (2.9 mg, 0.005 mmol) and MeCN (1.0 mL) at 60 °C for 6 h. The title compound was obtained in 82% yield (30.2 mg) as white solid. **M.P.** 101-103 °C.  $^1\text{H NMR}$  (400 MHz,  $\text{CDCl}_3$ )  $\delta$  7.63-7.57 (m, 4H), 7.48-7.42 (m, 2H), 7.40-7.34 (m, 2H), 7.31-7.26 (m, 3H), 6.98 (td,  $J = 7.2, 1.0$  Hz, 1H), 6.87 (dd,  $J = 8.2, 1.0$  Hz, 1H), 4.78 (d,  $J = 11.9$  Hz, 1H), 4.53 (dt,  $J = 11.9, 1.5$  Hz, 1H), 2.69-2.59 (m, 1H), 2.52-2.41 (m, 1H), 2.25-2.13 (m, 1H), 1.98-1.84 (m, 1H), 1.17-1.07 (m, 1H), 0.76 (td,  $J = 13.6, 3.6$  Hz, 1H), 0.47 (s, 3H).  $^{13}\text{C NMR}$  (100 MHz,  $\text{CDCl}_3$ )  $\delta$  163.9, 155.0, 140.9, 140.7, 140.1, 134.9, 131.2, 128.9, 128.3, 127.5, 127.4, 127.2, 127.1, 121.9, 121.1, 118.2, 68.8, 37.1, 20.9, 9.3, -2.4. **HRMS** (ESI,  $m/z$ ) calcd for  $\text{C}_{25}\text{H}_{24}\text{NaOSi}$   $[\text{M}+\text{Na}]^+$ : 391.1489, found: 391.1493.

**7-(3,5-dimethylphenyl)-11-methyl-8,9,10,11-tetrahydro-6H-benzo[b]silino[1,2-d][1,4]oxasiline (3f)**

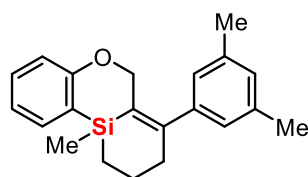

**3f**  
 $\text{C}_{21}\text{H}_{24}\text{OSi}$   
 $M = 320.51$  g/mol

Following the **general procedure IV**, the reaction was carried out with SCBs **1f** (0.1 mmol),  $[\text{Rh}(\text{cod})\text{Cl}]_2$  (1.0 mg, 0.002 mmol), **L1** (2.9 mg, 0.005 mmol) and MeCN (1.0 mL) at 60 °C for 6 h. The title compound was obtained in 87% yield (27.8 mg) as pale yellow oil.  $^1\text{H NMR}$  (400 MHz,  $\text{CDCl}_3$ )  $\delta$  7.29 (dd,  $J = 7.2, 1.8$  Hz, 1H), 7.22-7.16 (m, 1H), 6.89 (td,  $J = 7.2, 1.0$  Hz, 1H), 6.84 (s, 1H), 6.78 (dd,  $J = 8.3, 1.0$  Hz, 1H), 6.72 (s, 2H), 4.65 (d,  $J = 12.0$  Hz, 1H), 4.42 (dt,  $J = 11.9, 1.6$  Hz, 1H), 2.52-2.42 (m, 1H), 2.40-2.28 (m, 1H), 2.24 (s, 6H), 2.12-2.01 (m, 1H), 1.87-1.72 (m, 1H), 1.05-0.97 (m, 1H), 0.66 (td,  $J = 13.6, 3.6$  Hz, 1H), 0.36 (s, 3H).  $^{13}\text{C NMR}$  (100 MHz,  $\text{CDCl}_3$ )  $\delta$  164.0, 155.7, 141.9, 137.7, 134.8, 131.1, 128.9, 126.7, 125.5, 122.0, 121.0, 118.3, 69.0, 37.2, 21.5, 20.9, 9.3, -2.3. **HRMS** (ESI,  $m/z$ ) calcd for  $\text{C}_{21}\text{H}_{24}\text{NaOSi}$   $[\text{M}+\text{Na}]^+$ : 343.1489, found: 343.1492.

**7-(benzo[d][1,3]dioxol-5-yl)-11-methyl-8,9,10,11-tetrahydro-6H-benzo[b]silino[1,2-d][1,4]**

### oxasiline (**3g**)

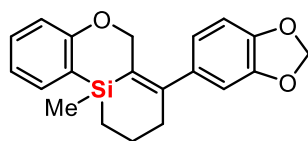

**3g**

$C_{20}H_{20}O_3Si$   
M = 336.46 g/mol

Following the **general procedure IV**, the reaction was carried out with SCBs **1g** (0.1 mmol),  $[Rh(cod)Cl]_2$  (1.0 mg, 0.002 mmol), **L1** (2.9 mg, 0.005 mmol) and MeCN (1.0 mL) at 60 °C for 6 h. The title compound was obtained in 95% yield (31.8 mg) as pale yellow oil.  **$^1H$  NMR (400 MHz,  $CDCl_3$ )**  $\delta$  7.28 (dd,  $J = 7.3, 1.9$  Hz, 1H), 7.22-7.17 (m, 1H), 6.89 (td,  $J = 7.3, 1.0$  Hz, 1H), 6.78 (dd,  $J = 8.3, 1.0$  Hz, 1H), 6.72 (d,  $J = 7.9$  Hz, 1H), 6.63 (d,  $J = 1.6$  Hz, 1H), 6.59 (dd,  $J = 8.0, 1.7$  Hz, 1H), 5.89-5.86 (m, 2H), 4.67 (d,  $J = 11.9$  Hz, 1H), 4.40 (dt,  $J = 11.9, 1.5$  Hz, 1H), 2.52-2.41 (m, 1H), 2.35-2.24 (m, 1H), 2.11-2.00 (m, 1H), 1.85-1.71 (m, 1H), 1.05-0.95 (m, 1H), 0.64 (td,  $J = 13.6, 3.6$  Hz, 1H), 0.36 (s, 3H).  **$^{13}C$  NMR (100 MHz,  $CDCl_3$ )**  $\delta$  163.9, 154.9, 147.5, 146.7, 135.7, 134.8, 131.1, 127.2, 121.8, 121.2, 121.0, 118.2, 108.5, 108.2, 101.1, 68.7, 37.2, 20.8, 9.3, -2.4. **HRMS (ESI,  $m/z$ )** calcd for  $C_{20}H_{20}NaO_3Si$   $[M+Na]^+$ : 359.1074, found: 359.1077.

### 11-methyl-7-(thiophen-2-yl)-8,9,10,11-tetrahydro-6H-benzo[b]silino[1,2-d][1,4]oxasiline (**3h**)

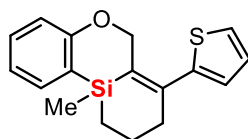

**3h**

$C_{17}H_{18}OSSi$   
M = 298.48 g/mol

Following the **general procedure IV**, the reaction was carried out with SCBs **1h** (0.1 mmol),  $[Rh(cod)Cl]_2$  (1.0 mg, 0.002 mmol), **L1** (2.9 mg, 0.005 mmol) and MeCN (1.0 mL) at 60 °C for 6 h. The title compound was obtained in 87% yield (25.8 mg) as yellow oil.  **$^1H$  NMR (400 MHz,  $CDCl_3$ )**  $\delta$  7.36 (dd,  $J = 7.3, 1.8$  Hz, 1H), 7.34-7.25 (m, 2H), 7.06-6.95 (m, 3H), 6.91 (dd,  $J = 8.3, 1.1$  Hz, 1H), 5.06 (d,  $J = 12.6$  Hz, 1H), 4.71 (dt,  $J = 12.6, 1.8$  Hz, 1H), 2.74-2.62

(m, 1H), 2.58-2.45 (m, 1H), 2.24-2.10 (m, 1H), 1.98-1.82 (m, 1H), 1.15-1.04 (m, 1H), 0.76 (td,  $J = 13.6, 3.6$  Hz, 1H), 0.45 (s, 3H).  $^{13}\text{C}$  NMR (100 MHz,  $\text{CDCl}_3$ )  $\delta$  163.8, 145.5, 143.1, 134.4, 131.2, 130.2, 126.9, 126.2, 125.1, 123.2, 121.6, 118.4, 69.9, 37.8, 20.8, 8.8, -2.5. HRMS (ESI,  $m/z$ ) calcd for  $\text{C}_{17}\text{H}_{18}\text{NaOSSi}$   $[\text{M}+\text{Na}]^+$ : 321.0740, found: 321.0748.

### 7-butyl-11-methyl-8,9,10,11-tetrahydro-6H-benzo[*b*]silino[1,2-*d*][1,4]oxasiline (3i)

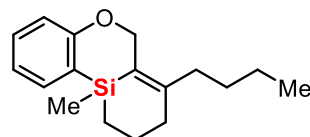

**3i**  
 $\text{C}_{17}\text{H}_{24}\text{OSi}$   
 $M = 272.46$  g/mol

Following the **general procedure IV**, the reaction was carried out with SCBs **1i** (0.1 mmol),  $[\text{Rh}(\text{cod})\text{Cl}]_2$  (1.0 mg, 0.002 mmol), **L1** (2.9 mg, 0.005 mmol) and MeCN (1.0 mL) at 60 °C for 6 h. The title compound was obtained in 83% yield (22.5 mg) as colorless oil.  $^1\text{H}$  NMR (400 MHz,  $\text{CDCl}_3$ )  $\delta$  7.33 (dd,  $J = 7.2, 1.8$  Hz, 1H), 7.29-7.23 (m, 1H), 6.95 (td,  $J = 7.2, 1.0$  Hz, 1H), 6.86 (dd,  $J = 8.2, 1.0$  Hz, 1H), 4.99 (d,  $J = 12.3$  Hz, 1H), 4.51 (d,  $J = 12.3$  Hz, 1H), 2.34-2.21 (m, 2H), 2.18-1.94 (m, 3H), 1.81-1.66 (m, 1H), 1.48-1.27 (m, 4H), 1.04-0.93 (m, 1H), 0.91 (t,  $J = 6.9$  Hz, 3H), 0.68-0.59 (m, 1H), 0.36 (s, 3H).  $^{13}\text{C}$  NMR (100 MHz,  $\text{CDCl}_3$ )  $\delta$  163.9, 155.8, 134.6, 130.9, 124.5, 123.0, 121.1, 118.2, 68.2, 35.1, 33.5, 31.4, 23.0, 20.8, 14.2, 9.4, -2.2. HRMS (ESI,  $m/z$ ) calcd for  $\text{C}_{17}\text{H}_{24}\text{NaOSi}$   $[\text{M}+\text{Na}]^+$ : 295.1489, found: 295.1485.

### 2-methoxy-11-methyl-7-phenyl-8,9,10,11-tetrahydro-6H-benzo[*b*]silino[1,2-*d*][1,4]oxasiline (3j)

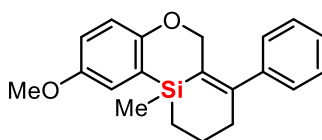

**3j**  
 $\text{C}_{20}\text{H}_{22}\text{O}_2\text{Si}$   
 $M = 322.48$  g/mol

Following the **general procedure IV**, the reaction was carried out with SCBs **1j** (0.1 mmol),  $[\text{Rh}(\text{cod})\text{Cl}]_2$  (1.0 mg, 0.002 mmol), **L1** (2.9 mg, 0.005 mmol) and MeCN (1.0 mL) at 60 °C

for 6 h. The title compound was obtained in 84% yield (27.2 mg) as colorless oil. **<sup>1</sup>H NMR (400 MHz, CDCl<sub>3</sub>)**  $\delta$  7.37-7.31 (m, 2H), 7.29-7.26 (m, 1H), 7.21-7.15 (m, 2H), 6.89-6.79 (m, 3H), 4.61 (d,  $J$  = 12.2 Hz, 1H), 4.49 (dt,  $J$  = 12.1, 1.6 Hz, 1H), 3.78 (s, 3H), 2.62-2.51 (m, 1H), 2.49-2.37 (m, 1H), 2.21-2.10 (m, 1H), 1.96-1.81 (m, 1H), 1.16-1.04 (m, 1H), 0.83-0.73 (m, 1H), 0.45 (s, 3H). **<sup>13</sup>C NMR (100 MHz, CDCl<sub>3</sub>)**  $\delta$  157.9, 154.8, 154.0, 142.0, 128.3, 127.8, 127.7, 127.2, 123.6, 119.2, 118.5, 117.1, 69.5, 55.9, 37.1, 20.8, 9.1, -2.4. **HRMS (ESI,  $m/z$ )** calcd for C<sub>20</sub>H<sub>22</sub>NaO<sub>2</sub>Si [M+Na]<sup>+</sup>: 345.1281, found: 345.1277.

**2-fluoro-11-methyl-7-phenyl-8,9,10,11-tetrahydro-6H-benzo[*b*]silino[1,2-*d*][1,4]oxasiline (3k)**

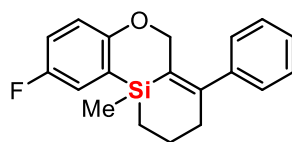

**3k**

C<sub>19</sub>H<sub>19</sub>FOSi  
M = 310.44 g/mol

Following the **general procedure IV**, the reaction was carried out with SCBs **1k** (0.1 mmol), [Rh(cod)Cl]<sub>2</sub> (1.0 mg, 0.002 mmol), **L1** (2.9 mg, 0.005 mmol) and MeCN (1.0 mL) at 60 °C for 6 h. The title compound was obtained in 78% yield (24.2 mg) as white solid. **M.P.** 89-91 °C. **<sup>1</sup>H NMR (400 MHz, CDCl<sub>3</sub>)**  $\delta$  7.36 (t,  $J$  = 7.3 Hz, 2H), 7.29 (d,  $J$  = 7.1 Hz, 1H), 7.18 (d,  $J$  = 7.0 Hz, 2H), 7.02 (dd,  $J$  = 7.9, 3.1 Hz, 1H), 6.95 (td,  $J$  = 8.6, 3.1 Hz, 1H), 6.80 (dd,  $J$  = 9.0, 4.3 Hz, 1H), 4.64 (d,  $J$  = 12.0 Hz, 1H), 4.48 (dt,  $J$  = 12.2, 1.6 Hz, 1H), 2.64-2.53 (m, 1H), 2.50-2.37 (m, 1H), 2.23-2.12 (m, 1H), 1.98-1.81 (m, 1H), 1.17-1.05 (m, 1H), 0.76 (td,  $J$  = 13.6, 3.6 Hz, 1H), 0.45 (s, 3H). **<sup>13</sup>C NMR (100 MHz, CDCl<sub>3</sub>)**  $\delta$  159.8, 157.6 (d,  $J$  = 240.1 Hz), 155.6, 141.8, 128.4, 127.7, 127.3, 126.9, 124.0 (d,  $J$  = 4.1 Hz), 119.7 (d,  $J$  = 3.5 Hz), 119.6 (d,  $J$  = 9.2 Hz), 117.9 (d,  $J$  = 22.9 Hz), 69.4, 37.1, 20.8, 9.0, -2.5. **<sup>19</sup>F NMR (471 MHz, CDCl<sub>3</sub>)**  $\delta$  -123.9 (s). **HRMS (ESI,  $m/z$ )** calcd for C<sub>19</sub>H<sub>19</sub>NaFOSi [M+Na]<sup>+</sup>: 333.1081, found: 333.1081.

**2-(*tert*-butyl)-11-methyl-7-phenyl-8,9,10,11-tetrahydro-6H-benzo[*b*]silino[1,2-*d*][1,4]oxasiline (3l)**

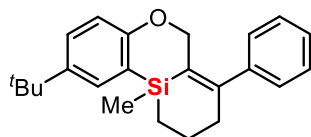

**3l**

$C_{23}H_{28}OSi$   
M = 348.56 g/mol

Following the **general procedure IV**, the reaction was carried out with SCBs **1l** (0.1 mmol),  $[Rh(cod)Cl]_2$  (1.0 mg, 0.002 mmol), **L1** (2.9 mg, 0.005 mmol) and MeCN (1.0 mL) at 60 °C for 6 h. The title compound was obtained in 76% yield (26.5 mg) as yellow oil.  $^1H$  NMR (400 MHz,  $CDCl_3$ )  $\delta$  7.37-7.31 (m, 4H), 7.30-7.26 (m, 1H), 7.21-7.16 (m, 2H), 6.82 (dd,  $J = 7.8, 1.1$  Hz, 1H), 4.66 (d,  $J = 11.9$  Hz, 1H), 4.48 (dt,  $J = 11.9, 1.6$  Hz, 1H), 2.65-2.54 (m, 1H), 2.47-2.35 (m, 1H), 2.24-2.12 (m, 1H), 1.97-1.83 (m, 1H), 1.31 (s, 9H), 1.17-1.07 (m, 1H), 0.77 (td,  $J = 13.7, 3.6$  Hz, 1H), 0.46 (s, 3H).  $^{13}C$  NMR (100 MHz,  $CDCl_3$ )  $\delta$  161.8, 155.2, 143.3, 141.9, 130.9, 128.6, 128.3, 127.8, 127.5, 127.2, 121.1, 117.7, 68.8, 37.1, 34.3, 31., 20.9, 9.4, -2.2. HRMS (ESI,  $m/z$ ) calcd for  $C_{23}H_{28}NaOSi$   $[M+Na]^+$ : 371.1802, found: 371.1799.

**11-ethyl-7-phenyl-8,9,10,11-tetrahydro-6H-benzo[b]silino[1,2-d][1,4]oxasiline (3m)**

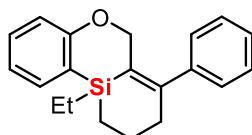

**3m**

$C_{20}H_{22}OSi$   
M = 306.48 g/mol

Following the **general procedure IV**, the reaction was carried out with SCBs **1m** (0.1 mmol),  $[Rh(cod)Cl]_2$  (1.0 mg, 0.002 mmol), **L1** (2.9 mg, 0.005 mmol) and MeCN (1.0 mL) at 60 °C for 6 h. The title compound was obtained in 82% yield (25.1 mg) as yellow oil.  $^1H$  NMR (400 MHz,  $CDCl_3$ )  $\delta$  7.39-7.32 (m, 3H), 7.31-7.25 (m, 2H), 7.21-7.17 (m, 2H), 6.97 (td,  $J = 7.2, 1.1$  Hz, 1H), 6.86 (dd,  $J = 8.3, 1.0$  Hz, 1H), 4.70 (d,  $J = 12.0$  Hz, 1H), 4.52 (dt,  $J = 12.0, 1.6$  Hz, 1H), 2.63-2.51 (m, 1H), 2.48-2.35 (m, 1H), 2.16-2.03 (m, 1H), 1.98-1.84 (m, 1H), 1.19-1.08 (m, 4H), 1.02-0.94 (m, 2H), 0.81-0.68 (m, 1H).  $^{13}C$  NMR (100 MHz,  $CDCl_3$ )  $\delta$  164.1, 155.8, 142.0, 135.1, 131.1, 128.3, 127.8, 127.2, 126.9, 121.1, 120.9, 118.2, 77.5, 77.2, 76.8, 69.4, 37.1, 21.3, 8.2, 7.7, 6.6. HRMS (ESI,  $m/z$ ) calcd for  $C_{20}H_{22}NaOSi$   $[M+Na]^+$ : 329.1332, found: 329.1333.

**11-cyclopropyl-7-phenyl-8,9,10,11-tetrahydro-6H-benzo[b]silino[1,2-d][1,4]oxasiline (3n)**

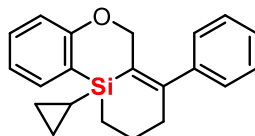

**3n**

C<sub>21</sub>H<sub>22</sub>OSi  
M = 318.49 g/mol

Following the **general procedure IV**, the reaction was carried out with SCBs **1n** (0.1 mmol), [Rh(cod)Cl]<sub>2</sub> (1.0 mg, 0.002 mmol), **L1** (2.9 mg, 0.005 mmol) and MeCN (1.0 mL) at 60 °C for 6 h. The title compound was obtained in 82% yield (26.0 mg) as yellow oil. **<sup>1</sup>H NMR (400 MHz, CDCl<sub>3</sub>)**  $\delta$  7.38-7.26 (m, 5H), 7.22-7.17 (m, 2H), 6.95 (td,  $J = 7.2, 1.0$  Hz, 1H), 6.85 (dd,  $J = 8.2, 1.0$  Hz, 1H), 4.70 (d,  $J = 12.0$  Hz, 1H), 4.58 (dt,  $J = 12.1, 1.6$  Hz, 1H), 2.63-2.52 (m, 1H), 2.46-2.35 (m, 1H), 2.19-2.07 (m, 1H), 2.02-1.88 (m, 1H), 1.18-1.06 (m, 1H), 0.80-0.63 (m, 3H), 0.49-0.36 (m, 2H), -0.02--0.13 (m, 1H). **<sup>13</sup>C NMR (100 MHz, CDCl<sub>3</sub>)**  $\delta$  164.1, 155.7, 141.9, 135.2, 131.2, 128.3, 127.8, 127.3, 126.8, 120.8, 119.9, 118.3, 69.3, 37.1, 21.4, 7.6, 2.1, 1.7, -6.2. **HRMS (ESI,  $m/z$ )** calcd for C<sub>21</sub>H<sub>22</sub>NaOSi [M+Na]<sup>+</sup>: 341.1332, found: 341.1330.

**7,11-diphenyl-8,9,10,11-tetrahydro-6H-benzo[b]silino[1,2-d][1,4]oxasiline (3o)**

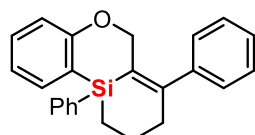

**3o**

C<sub>24</sub>H<sub>22</sub>OSi  
M = 354.52 g/mol

Following the **general procedure IV**, the reaction was carried out with SCBs **1o** (0.1 mmol), [Rh(cod)Cl]<sub>2</sub> (1.0 mg, 0.002 mmol), **L1** (2.9 mg, 0.005 mmol) and MeCN (1.0 mL) at 60 °C for 6 h. The title compound was obtained in 86% yield (30.3 mg) as yellow oil. **<sup>1</sup>H NMR (400 MHz, CDCl<sub>3</sub>)**  $\delta$  7.73-7.68 (m, 2H), 7.45 (dd,  $J = 7.2, 1.8$  Hz, 1H), 7.41-7.27 (m, 7H), 7.23-7.20 (m, 2H), 6.99 (td,  $J = 7.3, 1.1$  Hz, 1H), 6.90 (dd,  $J = 8.4, 1.0$  Hz, 1H), 4.75 (d,  $J = 12.1$  Hz, 1H), 4.59 (dt,  $J = 12.0, 1.5$  Hz, 1H), 2.72-2.61 (m, 1H), 2.59-2.45 (m, 1H), 2.25-2.14 (m, 1H), 2.13-1.93 (m, 1H), 1.53-1.46 (m, 1H), 1.08-0.91 (m, 1H). **<sup>13</sup>C NMR (100 MHz,**

$\text{CDCl}_3$ )  $\delta$  164.3, 156.6, 141.8, 136.1, 135.5, 135.1, 131.5, 129.7, 128.4, 128.2, 127.8, 127.4, 125.9, 121.2, 119.8, 118.4, 69.0, 37.1, 21.4, 8.5. **HRMS (ESI,  $m/z$ )** calcd for  $\text{C}_{24}\text{H}_{22}\text{NaOSi}$   $[\text{M}+\text{Na}]^+$ : 377.1332, found: 377.1334.

#### 4.5 Optimization of reaction conditions for the synthesis of silacycle 4a by Rh catalysis

**Table S3. Evaluation of ligand in the reaction<sup>a</sup>**

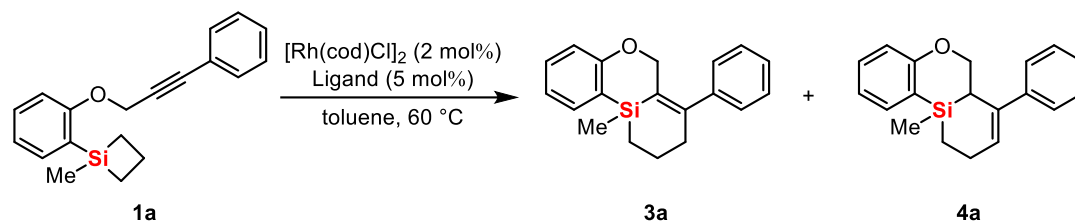

| Entry | Ligand | Yield of 3a+4a (%) <sup>b</sup> | 3a:4a (%) <sup>c</sup> |
|-------|--------|---------------------------------|------------------------|
| 1     | P1     | 75                              | 4:1                    |
| 2     | P2     | 37                              | 1:3                    |
| 3     | P3     | 54                              | 2:1                    |
| 4     | P4     | 31                              | 1:2                    |
| 5     | P5     | 53                              | 1:10                   |
| 6     | P6     | 46                              | 7:1                    |
| 7     | P7     | trace                           | -                      |
| 8     | P8     | trace                           | -                      |
| 9     | P9     | trace                           | -                      |
| 10    | P10    | 62                              | 2:3                    |
| 11    | P11    | 35                              | 3:2                    |

<sup>a</sup> All the reactions were carried out by using **1a** (0.1 mmol),  $[\text{Rh}(\text{cod})\text{Cl}]_2$  (2 mol%), Ligand (5 mol%) in toluene (0.1 M) for 12 h under an  $\text{N}_2$  atmosphere. <sup>b</sup> Isolated yield. <sup>c</sup> Determined by  $^1\text{H}$  NMR analysis.



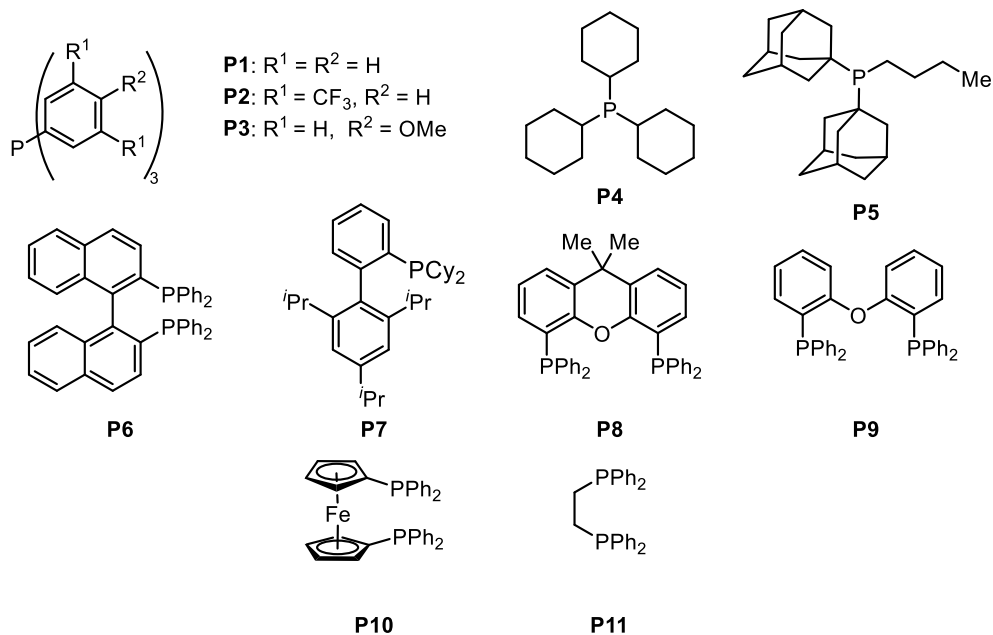

#### 4.6 General Procedure VII for the Synthesis of Product 4a

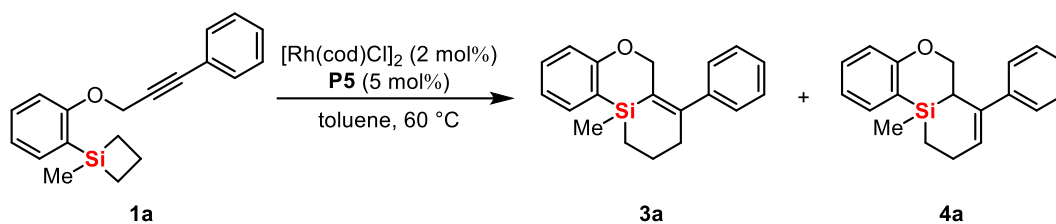

To a flame-dried Schlenk tube equipped with a septum and a magnetic stir bar,  $[\text{Rh}(\text{cod})\text{Cl}]_2$  (1.0 mg, 0.002 mmol, 2.0 mol%) and **P5** (1.8 mg, 0.005 mmol, 5.0 mol%) were added. The tube was evacuated under high vacuum and backfilled with nitrogen gas (3 times). Toluene (1.0 mL) was added to the tube, and then silacyclobutanes **1a** (SCBs) (0.1 mmol, 1.0 equiv, 0.1 M) was successively added dropwise. The reaction tube was stirred at 60 °C for 12 h. After removing the solvent under vacuum, the residues were purified by flash chromatography on silica gel to yield the target product **4a**.

#### 11-methyl-7-phenyl-6a,9,10,11-tetrahydro-6H-benzo[b]silino[1,2-d][1,4]oxasiline (**4a**)

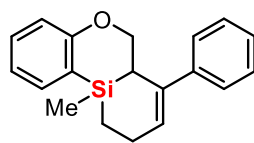

$C_{19}H_{20}OSi$   
 $M = 292.45 \text{ g/mol}$

Following the **general procedure VII**, the reaction was carried out with SCBs **1a** (0.1 mmol), [Rh(cod)Cl]<sub>2</sub> (1.0 mg, 0.002 mmol), **P5** (1.8 mg, 0.005 mmol) and toluene (1.0 mL) at 60 °C for 12 h. The title compound was obtained in 53% yield (15.6 mg, **3a:4a** = 1:10) as pale yellow oil. <sup>1</sup>H NMR (400 MHz, CDCl<sub>3</sub>) δ 7.38-7.31 (m, 3H), 7.25 (t, *J* = 7.5 Hz, 2H), 7.21-7.14 (m, 2H), 6.93 (td, *J* = 7.3, 1.0 Hz, 1H), 6.79 (d, *J* = 8.2 Hz, 1H), 6.11 (dd, *J* = 6.2, 4.1 Hz, 1H), 4.19 (dd, *J* = 11.5, 4.6 Hz, 1H), 3.90 (dd, *J* = 11.6, 9.3 Hz, 2H), 2.46-2.32 (m, 2H), 2.25-2.09 (m, 1H), 1.05-0.94 (m, 1H), 0.88-0.74 (m, 1H), 0.31 (s, 3H). <sup>13</sup>C NMR (100 MHz, CDCl<sub>3</sub>) δ 165.3, 143.6, 137.6, 135.1, 131.8, 131.1, 128.5, 126.9, 126.3, 121.6, 120.0, 117.7, 70.1, 25.0, 22.4, 8.8, -3.5. HRMS (ESI, *m/z*) calcd for C<sub>19</sub>H<sub>20</sub>NaOSi [M+Na]<sup>+</sup>: 315.1176, found: 315.1176.

## 4. DFT Studies

### 4.1 Computational methods

All calculations were performed with the Gaussian 16 suites of programs. Geometry optimization for all stationary points along the reaction paths without any symmetry constraints was conducted with the M06L functional. The standard 6-31G(d,p) basis was employed for the C, H, O, P, and Si atoms, whereas the SDD valence basis set in combination with the corresponding effective core potential were used for the Rh atom. The connectivity of the stationary points was verified by IRC runs or the vibrational mode of the imaginary frequencies. Optimized structures are illustrated using CYL view.

### 4.2 Energy profiles and energy parameters of Rh-catalyzed Intramolecular reaction of 1a.

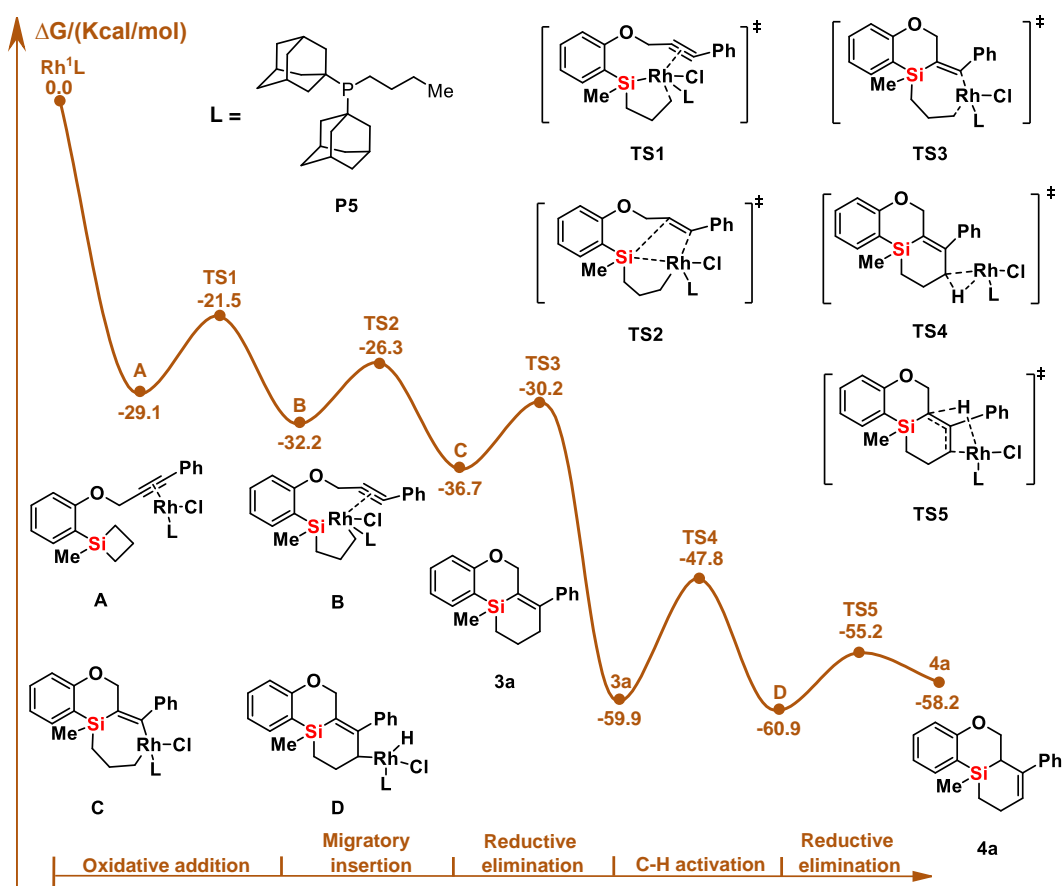

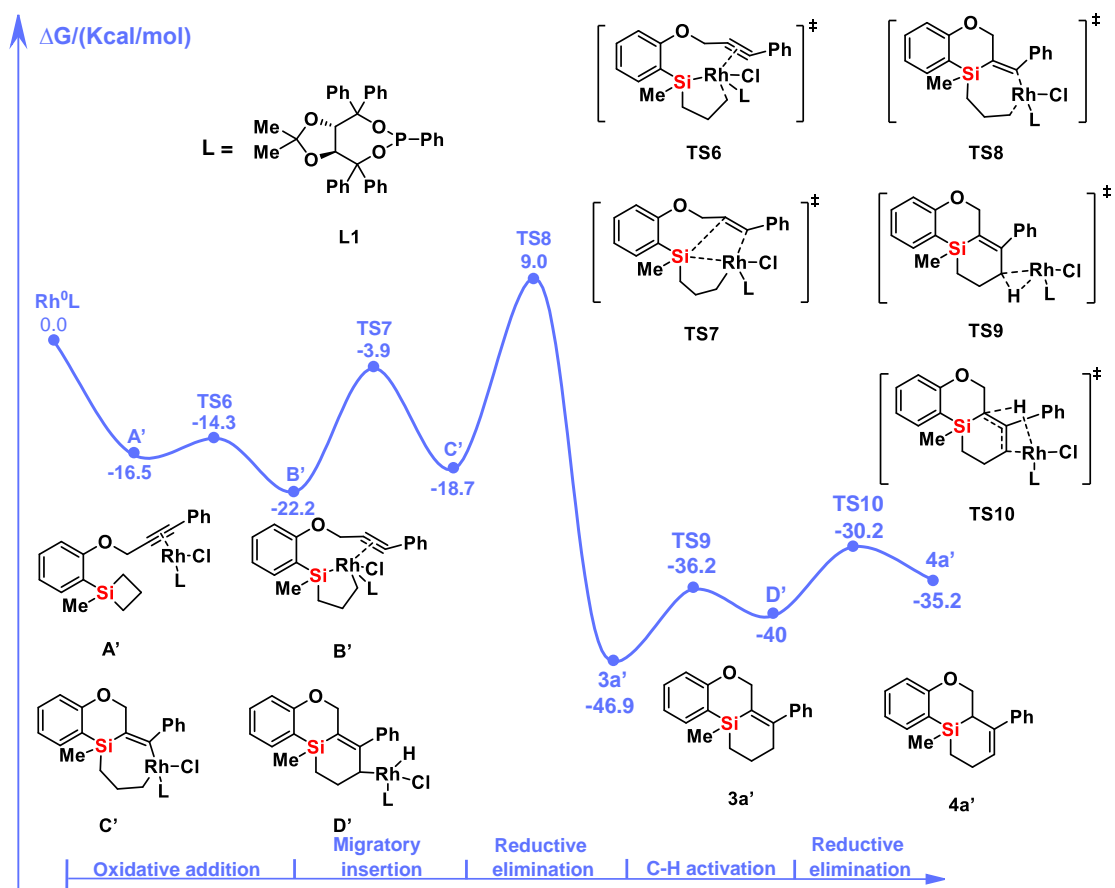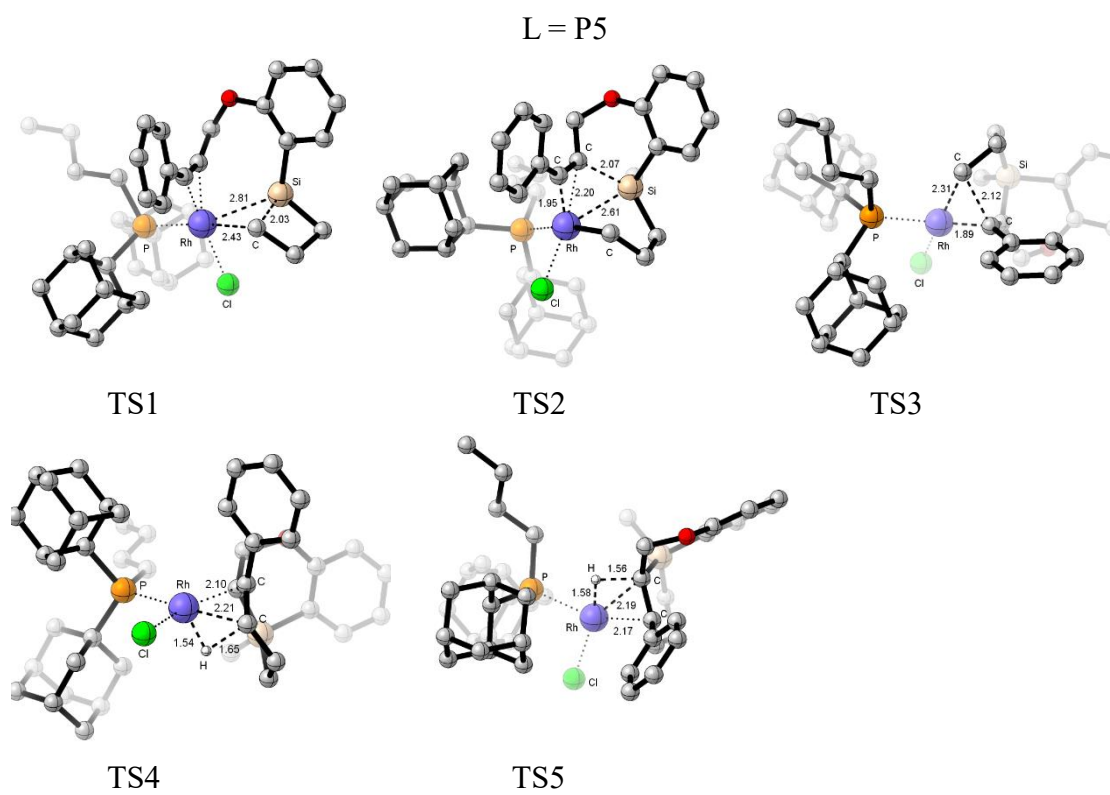

L = L1

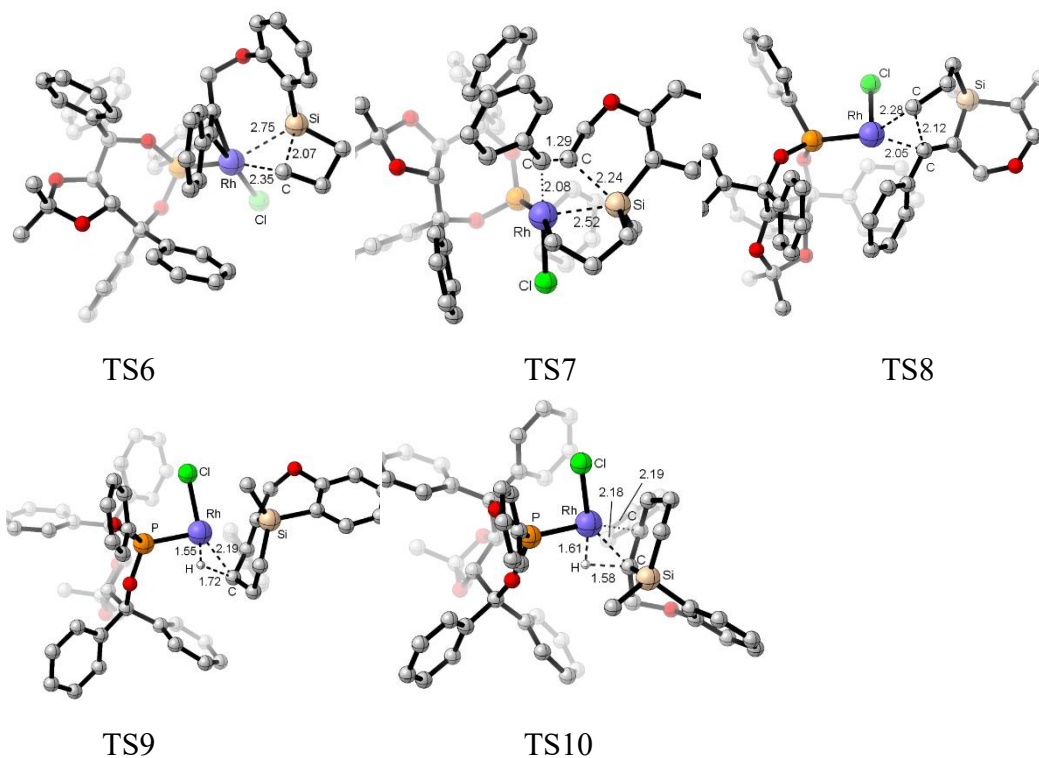

**Table S4** Energy Parameters (in kcal/mol) for Rh-P5-catalyzed Intramolecular reaction of **1a** calculated at M06L/6-31G(d,p)-SDD(Rh) level of theory.<sup>[a]</sup>

| Structures <sup>[a]</sup> | $\Delta E^{[b]}$ | $\Delta H^{[b]}$ | $\Delta G^{[b]}$ | $\Delta S^{[b][c]}$ |
|---------------------------|------------------|------------------|------------------|---------------------|
| <b>Rh<sup>0</sup>L</b>    | 0.0              | 0.0              | 0.0              | 0.0                 |
| <b>A</b>                  | -47.0            | -47.3            | -29.1            | -60.9               |
| <b>TS1</b>                | -41.6            | -42.7            | -21.5            | -71.2               |
| <b>B</b>                  | -52.5            | -53.5            | -32.2            | -71.5               |
| <b>TS2</b>                | -46.7            | -48.0            | -26.3            | -72.7               |
| <b>C</b>                  | -55.9            | -56.8            | -36.7            | -67.5               |
| <b>TS3</b>                | -50.3            | -51.5            | -30.2            | -71.4               |
| <b>3a</b>                 | -80.9            | -82.3            | -59.9            | -75.0               |
| <b>TS4</b>                | -68.7            | -70.2            | -47.8            | -74.9               |
| <b>D</b>                  | -82.1            | -83.4            | -60.9            | -75.3               |
| <b>TS5</b>                | -76.7            | -78.2            | -55.2            | -77.1               |
| <b>4a</b>                 | -78.6            | -80.0            | -58.2            | -73.2               |

[a] Relative activation energy and reaction parameters were calculated based on those of **Rh<sup>0</sup>L**. [b] Parameters for all the transition state (TSs) should read as those with double dagger like  $\Delta E^\ddagger$ ,  $\Delta H^\ddagger$ ,  $\Delta S^\ddagger$ , and  $\Delta G^\ddagger$ . [c] in cal.mol<sup>-1</sup>.K<sup>-1</sup>.

**Table S5** Electronic energies, enthalpies, free energies and imaginary frequencies calculated at M06L/6-31G(d,p)-SDD(Rh) level of theory.

| Structures             | $\Delta E$   | $\Delta H$   | $\Delta G$   |
|------------------------|--------------|--------------|--------------|
| <b>Rh<sup>0</sup>L</b> | -1849.872271 | -1849.845477 | -1849.928675 |
| <b>R</b>               | -1100.501899 | -1100.48008  | -1100.556702 |
| <b>A</b>               | -2950.44901  | -2950.400857 | -2950.531721 |
| <b>TS1</b>             | -2950.440399 | -2950.393643 | -2950.519638 |
| <b>B</b>               | -2950.457879 | -2950.410756 | -2950.536618 |
| <b>TS2</b>             | -2950.448641 | -2950.401975 | -2950.52725  |
| <b>C</b>               | -2950.463288 | -2950.416071 | -2950.54383  |
| <b>TS3</b>             | -2950.454278 | -2950.407649 | -2950.533563 |
| <b>3a</b>              | -2950.503101 | -2950.456674 | -2950.580854 |
| <b>TS4</b>             | -2950.483669 | -2950.43738  | -2950.5616   |
| <b>D</b>               | -2950.504967 | -2950.458435 | -2950.582488 |
| <b>TS5</b>             | -2950.496379 | -2950.450208 | -2950.573408 |
| <b>4a</b>              | -2950.499496 | -2950.453036 | -2950.578089 |

**Table S6** Energy Parameters (in kcal/mol) for Rh-L1-catalyzed Intramolecular reaction of **1a** calculated at M06L/6-31G(d,p)-SDD(Rh) level of theory.<sup>[a]</sup>.

| Structures <sup>[a]</sup> | $\Delta E^{[b]}$ | $\Delta H^{[b]}$ | $\Delta G^{[b]}$ | $\Delta S^{[b][c]}$ |
|---------------------------|------------------|------------------|------------------|---------------------|
| <b>Rh<sup>0</sup>L</b>    | 0.0              | 0.0              | 0.0              | 0.0                 |
| <b>A'</b>                 | -35.7            | -35.4            | -16.5            | -63.3               |
| <b>TS6</b>                | -34.9            | -35.3            | -14.3            | -70.3               |
| <b>B'</b>                 | -42.4            | -42.4            | -22.2            | -67.6               |
| <b>TS7</b>                | -24.6            | -24.9            | -3.9             | -70.3               |
| <b>C'</b>                 | -39.3            | -39.5            | -18.7            | -69.9               |
| <b>TS8</b>                | -11.5            | -12.1            | 9.0              | -70.7               |
| <b>3a</b>                 | -67.7            | -68.2            | -46.9            | -71.4               |

|             |       |       |       |       |
|-------------|-------|-------|-------|-------|
| <b>TS9</b>  | -56.5 | -57.0 | -36.2 | -69.7 |
| <b>D'</b>   | -59.8 | -60.1 | -40.0 | -67.5 |
| <b>TS10</b> | -51.4 | -52.0 | -30.2 | -73.3 |
| <b>4a'</b>  | -55.1 | -55.5 | -35.2 | -68.0 |

[a] Relative activation energy and reaction parameters were calculated based on those of **Rh<sup>0</sup>L**. [b] Parameters for all the transition state (TSs) should read as those with double dagger like  $\Delta E^\ddagger$ ,  $\Delta H^\ddagger$ ,  $\Delta S^\ddagger$ , and  $\Delta G^\ddagger$ . [c] in  $\text{cal}\cdot\text{mol}^{-1}\cdot\text{K}^{-1}$ .

**Table S7** Electronic energies, enthalpies, free energies and imaginary frequencies calculated at M06L/6-31G(d,p)-SDD(Rh) level of theory.

| Structures             | $\Delta E$   | $\Delta H$   | $\Delta G$   |
|------------------------|--------------|--------------|--------------|
| <b>Rh<sup>0</sup>L</b> | -2642.560583 | -2642.521289 | -2642.632265 |
| <b>R</b>               | -1100.501899 | -1100.48008  | -1100.556702 |
| <b>A'</b>              | -3743.119342 | -3743.058755 | -3743.215332 |
| <b>TS6</b>             | -3743.118116 | -3743.05854  | -3743.211814 |
| <b>B'</b>              | -3743.130037 | -3743.069821 | -3743.224366 |
| <b>TS7</b>             | -3743.101612 | -3743.041972 | -3743.195247 |
| <b>C'</b>              | -3743.125137 | -3743.0653   | -3743.218756 |
| <b>TS8</b>             | -3743.080829 | -3743.021543 | -3743.17461  |
| <b>3a'</b>             | -3743.17039  | -3743.111057 | -3743.263781 |
| <b>TS9</b>             | -3743.152476 | -3743.093072 | -3743.246602 |
| <b>D'</b>              | -3743.157828 | -3743.098092 | -3743.252664 |
| <b>TS10</b>            | -3743.144351 | -3743.085219 | -3743.237039 |
| <b>4a'</b>             | -3743.150268 | -3743.090711 | -3743.245068 |

### 4.3 Cartesian Coordinates of the Stationary Points

#### L=P5

#### Rh-P5

|   |             |             |             |
|---|-------------|-------------|-------------|
| C | -2.86595600 | 0.41805000  | 0.87898500  |
| H | -2.50907100 | 1.12332800  | 1.64043000  |
| H | -3.02619900 | -0.54387000 | 1.37742400  |
| C | -1.80424800 | 0.27276000  | -0.24003100 |

|   |             |             |             |
|---|-------------|-------------|-------------|
| C | -4.20272900 | 0.90702800  | 0.29033700  |
| H | -4.93543200 | 0.99461700  | 1.10142600  |
| C | -4.00472200 | 2.27608500  | -0.38228300 |
| H | -3.66839200 | 3.01445800  | 0.35593500  |
| H | -4.95770900 | 2.63661700  | -0.78868000 |
| C | -1.62911600 | 1.66014500  | -0.91335300 |
| H | -0.87309900 | 1.60919600  | -1.70334600 |
| H | -1.25905800 | 2.38137200  | -0.17273000 |
| C | -2.96445400 | 2.14371700  | -1.50738900 |
| H | -2.80825700 | 3.11800900  | -1.98489300 |
| C | -3.45703000 | 1.12483200  | -2.55137600 |
| H | -4.39890200 | 1.46767300  | -2.99697700 |
| H | -2.72788500 | 1.03876700  | -3.36717400 |
| C | -2.31957300 | -0.73400000 | -1.29332400 |
| H | -2.45174400 | -1.72468600 | -0.84592800 |
| H | -1.59064200 | -0.84457600 | -2.10318600 |
| C | -4.69899300 | -0.11380100 | -0.74967300 |
| H | -4.86247000 | -1.08885500 | -0.27279200 |
| H | -5.66312400 | 0.20776200  | -1.16213900 |
| C | -3.66050000 | -0.24472100 | -1.87840400 |
| H | -4.01009100 | -0.97310300 | -2.62001500 |
| P | -0.15597800 | -0.18104000 | 0.54876200  |
| C | 0.82342400  | -1.15850000 | -0.71137500 |
| H | 0.18174000  | -1.97870800 | -1.05493400 |
| C | 2.09911300  | -1.76999400 | -0.07338700 |
| C | 1.24705600  | -0.32176300 | -1.94489500 |
| H | 1.83179800  | -2.35301100 | 0.81385000  |
| C | 3.10490700  | -0.66881600 | 0.31185400  |
| C | 2.76059600  | -2.70922000 | -1.10410400 |
| H | 0.36766600  | 0.13714400  | -2.40499100 |



|   |             |             |             |
|---|-------------|-------------|-------------|
| C | 2.25683200  | 0.77158100  | -1.55382300 |
| C | 1.90963200  | -1.26450600 | -2.97212500 |
| H | 3.98669600  | -1.11708600 | 0.78425000  |
| H | 2.67442600  | 0.01467800  | 1.08192700  |
| C | 3.50868700  | 0.13915600  | -0.92963800 |
| H | 2.06702000  | -3.51573000 | -1.37326400 |
| H | 3.64408400  | -3.18099500 | -0.65689000 |
| C | 3.16361800  | -1.91048900 | -2.35655900 |
| H | 1.80171400  | 1.50077100  | -0.84096200 |
| H | 2.52366400  | 1.36665000  | -2.43502600 |
| H | 1.19626200  | -2.03772600 | -3.28386100 |
| H | 2.18037700  | -0.69612200 | -3.87026100 |
| H | 4.21173200  | 0.92656200  | -0.64136100 |
| C | 4.16238800  | -0.80748000 | -1.95880500 |
| H | 3.62701200  | -2.58332800 | -3.08778700 |
| H | 4.47104000  | -0.24024000 | -2.84522100 |
| H | 5.06854800  | -1.25456600 | -1.53251100 |
| C | -0.50902900 | -1.43250000 | 1.87448600  |
| H | -1.14808900 | -0.93037600 | 2.60808300  |
| H | 0.45194600  | -1.58142600 | 2.38004700  |
| C | -1.10667500 | -2.78744800 | 1.47879800  |
| H | -2.09800200 | -2.64414100 | 1.03443400  |
| H | -0.48937700 | -3.25981800 | 0.70487300  |
| C | -1.22679700 | -3.74069600 | 2.67319000  |
| H | -1.84159400 | -3.26837200 | 3.45047100  |
| H | -0.23321200 | -3.88696500 | 3.11691600  |
| C | -1.82707400 | -5.09500300 | 2.29007300  |
| H | -1.90152800 | -5.75891200 | 3.15664300  |
| H | -2.83336300 | -4.97667000 | 1.87280900  |
| H | -1.21314800 | -5.59896500 | 1.53515900  |

|          |             |             |             |
|----------|-------------|-------------|-------------|
| Rh       | 1.10742500  | 1.55776200  | 1.20907500  |
| Cl       | 2.42141600  | 3.37590800  | 1.90161200  |
| <b>R</b> |             |             |             |
| C        | 4.24972000  | -0.51115600 | 0.25849000  |
| C        | 2.87707500  | -0.25052000 | 0.20986300  |
| C        | 2.02101600  | -1.32844600 | -0.08990700 |
| C        | 2.51184600  | -2.61261800 | -0.33103400 |
| C        | 3.89182200  | -2.83257500 | -0.27066100 |
| C        | 4.76467900  | -1.78991500 | 0.02264100  |
| H        | 4.93213500  | 0.30257500  | 0.48632600  |
| H        | 1.84918900  | -3.43682700 | -0.56557400 |
| H        | 4.27615600  | -3.83078300 | -0.45817600 |
| H        | 5.83452500  | -1.96655600 | 0.06726600  |
| C        | 3.46939900  | 2.81424600  | 0.32993500  |
| C        | 1.59335100  | 2.31464400  | -1.09603200 |
| C        | 3.02761400  | 2.93353700  | -1.16609400 |
| H        | 4.53312600  | 2.62896300  | 0.49771700  |
| H        | 3.19193300  | 3.71294200  | 0.89273700  |
| H        | 1.28013000  | 1.73033700  | -1.96332100 |
| H        | 0.83753600  | 3.08514300  | -0.90668000 |
| H        | 3.67050800  | 2.30402600  | -1.79034400 |
| H        | 3.06898900  | 3.94973400  | -1.57485200 |
| C        | 1.01064400  | 1.45548500  | 2.01212000  |
| H        | 0.17161300  | 0.77524100  | 1.84188300  |
| H        | 1.54658800  | 1.12194200  | 2.90704600  |
| H        | 0.61342200  | 2.45687800  | 2.20613000  |
| C        | -0.26305100 | -2.03029600 | -0.36418300 |
| H        | -0.09770800 | -2.47217900 | -1.35771700 |
| H        | -0.14027700 | -2.83192500 | 0.37842900  |

|    |             |             |             |
|----|-------------|-------------|-------------|
| C  | -1.59894700 | -1.46108500 | -0.27521700 |
| C  | -2.71245200 | -0.99158700 | -0.19818500 |
| C  | -4.02363600 | -0.43435400 | -0.11257900 |
| C  | -4.51722200 | 0.38389200  | -1.14513000 |
| C  | -4.83762800 | -0.69394300 | 1.00504800  |
| C  | -5.79500700 | 0.92780200  | -1.05757900 |
| H  | -3.88783400 | 0.58485700  | -2.00522800 |
| C  | -6.11514800 | -0.14791300 | 1.08330900  |
| H  | -4.45541600 | -1.32291600 | 1.80174500  |
| C  | -6.59707400 | 0.66353600  | 0.05435500  |
| H  | -6.16661600 | 1.55921300  | -1.85857700 |
| H  | -6.73604300 | -0.35421200 | 1.94952100  |
| H  | -7.59366700 | 1.08896800  | 0.11912600  |
| O  | 0.69026400  | -0.99503000 | -0.12640800 |
| Si | 2.14339900  | 1.45874400  | 0.50920300  |

**A**

|   |             |             |             |
|---|-------------|-------------|-------------|
| C | -6.39303800 | -0.75956000 | -0.15459400 |
| C | -5.06283400 | -0.40434800 | 0.16482400  |
| C | -4.82573900 | -0.04430100 | 1.50817900  |
| C | -5.86493500 | -0.00714200 | 2.44658600  |
| C | -7.16205400 | -0.34973000 | 2.08474600  |
| C | -7.42974300 | -0.74439300 | 0.77382200  |
| H | -6.62366300 | -1.03692900 | -1.17990800 |
| H | -5.62081400 | 0.29052300  | 3.46081700  |
| H | -7.95541100 | -0.31764100 | 2.82567800  |
| H | -8.43488900 | -1.02319800 | 0.47355900  |
| C | -4.82839100 | 0.03519100  | -2.96254300 |
| C | -2.96426400 | 1.11187000  | -1.89325800 |
| C | -3.58616000 | 0.91683700  | -3.30771500 |

|    |             |             |             |
|----|-------------|-------------|-------------|
| H  | -5.71222700 | 0.65338500  | -2.77496200 |
| H  | -5.08669800 | -0.72100900 | -3.70801800 |
| H  | -3.81791100 | 1.85166800  | -3.83009100 |
| H  | -2.88005800 | 0.35493100  | -3.92706800 |
| C  | -3.06435000 | -2.11143400 | -1.53556100 |
| H  | -2.46422900 | -2.38670600 | -0.66604300 |
| H  | -3.82142800 | -2.88993900 | -1.68528800 |
| H  | -2.39674000 | -2.08866100 | -2.40148400 |
| C  | -2.43182200 | -0.37060600 | 1.66699400  |
| H  | -1.95119700 | -0.68357500 | 2.60545300  |
| H  | -2.68893700 | -1.27812100 | 1.11568300  |
| C  | -1.50911900 | 0.48796300  | 0.89599400  |
| C  | -1.00544900 | 1.62880700  | 0.64178500  |
| C  | -0.73394200 | 3.01838900  | 0.89382000  |
| C  | -0.74823400 | 3.51809700  | 2.21002900  |
| C  | -0.41640800 | 3.89052900  | -0.16325100 |
| C  | -0.43989300 | 4.85307900  | 2.45827600  |
| H  | -1.00194800 | 2.84784700  | 3.02523600  |
| C  | -0.11493900 | 5.22490300  | 0.09094500  |
| H  | -0.39827900 | 3.49960700  | -1.17459100 |
| C  | -0.11944700 | 5.70903000  | 1.40165200  |
| H  | -0.44928700 | 5.22740500  | 3.47761100  |
| H  | 0.12930800  | 5.88797800  | -0.73338600 |
| H  | 0.12299300  | 6.74878600  | 1.59869400  |
| O  | -3.61113300 | 0.34870500  | 2.02757500  |
| Si | -3.92823900 | -0.44843400 | -1.35601200 |
| C  | 0.33105700  | -2.91136400 | 0.29665200  |
| H  | -0.33304800 | -2.51623200 | -0.47553700 |
| H  | -0.10441500 | -2.64402500 | 1.26873400  |
| C  | 1.72584000  | -2.25895400 | 0.14118000  |

|   |             |             |             |
|---|-------------|-------------|-------------|
| C | 0.43501500  | -4.44176900 | 0.17485100  |
| H | -0.56622700 | -4.87413700 | 0.29139600  |
| C | 0.99689900  | -4.79699300 | -1.21306000 |
| H | 0.33089900  | -4.41467300 | -1.99529100 |
| H | 1.04948700  | -5.88672700 | -1.33040400 |
| C | 2.30396300  | -2.64724600 | -1.24157400 |
| H | 3.30537300  | -2.21921500 | -1.36409900 |
| H | 1.67294800  | -2.24476600 | -2.03547500 |
| C | 2.39786000  | -4.17950200 | -1.36907100 |
| H | 2.79840500  | -4.42172000 | -2.36045900 |
| C | 3.33269700  | -4.72979800 | -0.27974700 |
| H | 3.42612700  | -5.81934200 | -0.36950100 |
| H | 4.33946700  | -4.30888800 | -0.39889100 |
| C | 2.65752200  | -2.82929500 | 1.23566600  |
| H | 2.26590000  | -2.59663700 | 2.22873900  |
| H | 3.65678300  | -2.38278600 | 1.16079400  |
| C | 1.36932500  | -4.98602800 | 1.26902900  |
| H | 0.96719300  | -4.74772800 | 2.26255400  |
| H | 1.43547900  | -6.07899400 | 1.20220500  |
| C | 2.76667000  | -4.36284200 | 1.10168300  |
| H | 3.43411000  | -4.73396700 | 1.88922600  |
| P | 1.49291900  | -0.38322600 | 0.26296000  |
| C | 3.12250900  | 0.33112200  | -0.33642200 |
| H | 3.81682300  | -0.50931400 | -0.20638500 |
| C | 3.70434300  | 1.52513600  | 0.46070000  |
| C | 3.10436800  | 0.70712900  | -1.84301200 |
| H | 3.71720900  | 1.29867800  | 1.52536800  |
| C | 2.89705000  | 2.80887800  | 0.21565100  |
| C | 5.16071300  | 1.73886000  | -0.00497200 |
| H | 2.64719500  | -0.09369900 | -2.42618100 |

|   |            |             |             |
|---|------------|-------------|-------------|
| C | 2.30592900 | 2.00271200  | -2.07330000 |
| C | 4.55999500 | 0.92646900  | -2.29921100 |
| H | 3.32329500 | 3.62726200  | 0.80938000  |
| H | 1.86348000 | 2.68271400  | 0.54755600  |
| C | 2.92664800 | 3.16254000  | -1.28094100 |
| H | 5.75334900 | 0.83560800  | 0.19032600  |
| H | 5.61113800 | 2.55097000  | 0.57969800  |
| C | 5.19115500 | 2.08402500  | -1.50340800 |
| H | 1.26289100 | 1.85402300  | -1.77025200 |
| H | 2.29060900 | 2.22624600  | -3.14640500 |
| H | 5.14444700 | 0.00757000  | -2.15829000 |
| H | 4.57353800 | 1.15341900  | -3.37216100 |
| H | 2.34727300 | 4.07792000  | -1.44781500 |
| C | 4.38228300 | 3.37478000  | -1.73790800 |
| H | 6.22871400 | 2.23308300  | -1.82634000 |
| H | 4.40519500 | 3.64388900  | -2.80134700 |
| H | 4.83670500 | 4.20692600  | -1.18459600 |
| C | 1.34463200 | -0.02877900 | 2.08997700  |
| H | 0.53645600 | -0.69912900 | 2.40252300  |
| H | 0.92058100 | 0.97370300  | 2.15572300  |
| C | 2.53286000 | -0.15847900 | 3.06848300  |
| H | 3.36662400 | -0.71823200 | 2.63803200  |
| H | 2.92381400 | 0.83985600  | 3.29036600  |
| C | 2.11599500 | -0.81347600 | 4.39110000  |
| H | 1.71336400 | -1.81526400 | 4.18938400  |
| H | 1.29018100 | -0.23800500 | 4.83001500  |
| C | 3.26952700 | -0.91433000 | 5.39010700  |
| H | 2.94912200 | -1.38156500 | 6.32629600  |
| H | 4.09096500 | -1.51328300 | 4.98117400  |
| H | 3.67074500 | 0.07629600  | 5.63104900  |

|    |             |             |             |
|----|-------------|-------------|-------------|
| Rh | -0.38372200 | 0.25592100  | -0.78398100 |
| Cl | 0.03875400  | -0.65330100 | -2.94509600 |
| H  | -3.34683100 | 1.99660000  | -1.37335300 |
| H  | -1.86922500 | 1.22784700  | -1.93380900 |

**TS1**

|   |             |             |             |
|---|-------------|-------------|-------------|
| C | -5.54887600 | -1.53554900 | -0.54620900 |
| C | -4.27837200 | -1.49735600 | 0.08374600  |
| C | -4.32401000 | -1.29284400 | 1.48686800  |
| C | -5.54477400 | -1.13971300 | 2.16534900  |
| C | -6.75656200 | -1.18717600 | 1.49686900  |
| C | -6.76066800 | -1.38918900 | 0.11777700  |
| H | -5.58799800 | -1.68425900 | -1.61681700 |
| H | -5.49862600 | -0.98327500 | 3.23781000  |
| H | -7.68464800 | -1.06583400 | 2.04743900  |
| H | -7.69192900 | -1.42996500 | -0.43810000 |
| C | -3.48501400 | -1.88715700 | -2.98896200 |
| C | -2.61786100 | 0.15564500  | -2.01003300 |
| C | -3.01528100 | -0.45556200 | -3.36884400 |
| H | -4.54544300 | -2.06733900 | -3.17219900 |
| H | -2.93136400 | -2.66496700 | -3.52355300 |
| H | -3.78683300 | 0.14194700  | -3.86765900 |
| H | -2.14012300 | -0.49373800 | -4.01911800 |
| C | -1.80200100 | -3.23628700 | -0.90536500 |
| H | -1.24081100 | -3.31474700 | 0.02280500  |
| H | -2.50858000 | -4.07606500 | -0.95598700 |
| H | -1.10061700 | -3.32300100 | -1.73876500 |
| C | -1.93421800 | -1.33812700 | 1.94415700  |
| H | -1.34112300 | -1.27576000 | 2.86358700  |
| H | -1.76729400 | -2.32415600 | 1.50838100  |

|    |             |             |             |
|----|-------------|-------------|-------------|
| C  | -1.55646200 | -0.25651000 | 1.01539700  |
| C  | -1.62863000 | 0.96026400  | 0.65771400  |
| C  | -2.15196600 | 2.28950100  | 0.81413100  |
| C  | -2.88061300 | 2.60342500  | 1.97979800  |
| C  | -1.98084800 | 3.27845300  | -0.16913500 |
| C  | -3.40660700 | 3.87900200  | 2.15508300  |
| H  | -3.03650800 | 1.82899900  | 2.72431500  |
| C  | -2.50920600 | 4.55346600  | 0.01389500  |
| H  | -1.43131800 | 3.03461600  | -1.07000400 |
| C  | -3.21931400 | 4.85997900  | 1.17631000  |
| H  | -3.96820900 | 4.10977100  | 3.05543300  |
| H  | -2.36682200 | 5.30881700  | -0.75307400 |
| H  | -3.62995700 | 5.85498300  | 1.31773600  |
| O  | -3.27881700 | -1.20726500 | 2.37693100  |
| Si | -2.85556000 | -1.68968500 | -1.19538100 |
| C  | 1.53482100  | -2.75655500 | 0.35080400  |
| H  | 0.80536000  | -2.69516000 | -0.45682700 |
| H  | 0.98220300  | -2.68407400 | 1.29768600  |
| C  | 2.52097500  | -1.57466300 | 0.21924900  |
| C  | 2.28285400  | -4.09953600 | 0.28617800  |
| H  | 1.55575800  | -4.91456800 | 0.38677400  |
| C  | 2.99916400  | -4.20569800 | -1.07170600 |
| H  | 2.26646800  | -4.15697000 | -1.88561900 |
| H  | 3.51524400  | -5.17082300 | -1.15172400 |
| C  | 3.26905600  | -1.70327700 | -1.13119600 |
| H  | 4.00009100  | -0.89370400 | -1.23547300 |
| H  | 2.56153900  | -1.62190900 | -1.95650000 |
| C  | 4.00947600  | -3.05272300 | -1.20583300 |
| H  | 4.51499800  | -3.11770300 | -2.17664700 |
| C  | 5.04443100  | -3.13560200 | -0.07249300 |



|   |            |             |             |
|---|------------|-------------|-------------|
| H | 5.59434500 | -4.08376700 | -0.12389200 |
| H | 5.78189500 | -2.32899600 | -0.17522900 |
| C | 3.56506600 | -1.67588900 | 1.35563600  |
| H | 3.07683900 | -1.61123700 | 2.33087300  |
| H | 4.28408000 | -0.85007500 | 1.29073100  |
| C | 3.31371700 | -4.17496000 | 1.42527800  |
| H | 2.80769100 | -4.11199400 | 2.39773300  |
| H | 3.84022500 | -5.13705100 | 1.39815800  |
| C | 4.31959300 | -3.01967200 | 1.27807700  |
| H | 5.04840200 | -3.05698300 | 2.09725100  |
| P | 1.49438000 | 0.02256700  | 0.29289400  |
| C | 2.69074300 | 1.33435900  | -0.32955700 |
| H | 3.67008100 | 0.87365600  | -0.14851700 |
| C | 2.69871700 | 2.69817400  | 0.40350600  |
| C | 2.56405100 | 1.59800500  | -1.85474900 |
| H | 2.76944400 | 2.54855600  | 1.47883500  |
| C | 1.43895300 | 3.51470800  | 0.08164700  |
| C | 3.94839700 | 3.47719300  | -0.05949800 |
| H | 2.49714800 | 0.65420000  | -2.39761600 |
| C | 1.30861800 | 2.43183000  | -2.16504400 |
| C | 3.81057600 | 2.38149300  | -2.31110400 |
| H | 1.46503000 | 4.46245100  | 0.63398500  |
| H | 0.54494300 | 2.97967300  | 0.41340300  |
| C | 1.36614300 | 3.78018500  | -1.43198000 |
| H | 4.85579700 | 2.91276700  | 0.19163300  |
| H | 4.00272700 | 4.43001900  | 0.48226600  |
| C | 3.87985700 | 3.73222300  | -1.57459900 |
| H | 0.41462300 | 1.87436500  | -1.86193000 |
| H | 1.23347900 | 2.57816200  | -3.24897200 |
| H | 4.71847200 | 1.79617000  | -2.11460400 |

|          |             |             |             |
|----------|-------------|-------------|-------------|
| H        | 3.76222400  | 2.54382700  | -3.39481900 |
| H        | 0.46752500  | 4.36701700  | -1.65776100 |
| C        | 2.61628100  | 4.55703300  | -1.88691100 |
| H        | 4.77102400  | 4.28450900  | -1.89677300 |
| H        | 2.55757900  | 4.76184800  | -2.96320800 |
| H        | 2.66651300  | 5.52722900  | -1.37596200 |
| C        | 1.24204000  | 0.30708700  | 2.12167600  |
| H        | 0.85821600  | -0.66207200 | 2.46029000  |
| H        | 0.39366700  | 0.98841300  | 2.19591400  |
| C        | 2.36332000  | 0.76971800  | 3.07679700  |
| H        | 3.35979800  | 0.60342500  | 2.66069800  |
| H        | 2.27757900  | 1.84957500  | 3.23453600  |
| C        | 2.26615600  | 0.08096100  | 4.44377300  |
| H        | 2.35076000  | -1.00593200 | 4.30990600  |
| H        | 1.26676700  | 0.25817400  | 4.86307300  |
| C        | 3.33522000  | 0.56235800  | 5.42584600  |
| H        | 3.24609500  | 0.05925500  | 6.39354300  |
| H        | 4.34098700  | 0.36573900  | 5.03790800  |
| H        | 3.25326500  | 1.64077100  | 5.60100200  |
| Rh       | -0.55491100 | -0.14256600 | -0.77105700 |
| Cl       | 0.35407600  | -1.00933700 | -2.81720100 |
| H        | -3.45156300 | 0.63906700  | -1.48972100 |
| H        | -1.84637500 | 0.93141000  | -2.10420600 |
| <b>B</b> |             |             |             |
| C        | -4.28568700 | -2.90203800 | -0.06332300 |
| C        | -3.08512600 | -2.48067800 | 0.53242800  |
| C        | -3.14540000 | -2.12191000 | 1.88783400  |
| C        | -4.32578700 | -2.18415800 | 2.62558900  |
| C        | -5.50009000 | -2.61439800 | 2.00549900  |

|   |             |             |             |
|---|-------------|-------------|-------------|
| C | -5.48055700 | -2.96797500 | 0.65603900  |
| H | -4.28838600 | -3.17982700 | -1.11290800 |
| H | -4.30991900 | -1.89837800 | 3.67283900  |
| H | -6.42340600 | -2.66976400 | 2.57445900  |
| H | -6.39159300 | -3.29723900 | 0.16548700  |
| C | -1.75496100 | -3.06796900 | -2.19182400 |
| C | -2.45321700 | -0.60864400 | -2.20203300 |
| C | -2.32756500 | -1.89636300 | -3.02729500 |
| H | -2.39465600 | -3.95875600 | -2.20016200 |
| H | -0.78225900 | -3.37763300 | -2.58957200 |
| H | -3.32276100 | -2.15618800 | -3.41591700 |
| H | -1.68586000 | -1.71416000 | -3.88938900 |
| C | -0.25288600 | -3.54655600 | 0.47346600  |
| H | -0.72589100 | -4.53658800 | 0.51000900  |
| H | 0.69356700  | -3.64484700 | -0.05879900 |
| H | -0.06941000 | -3.22578200 | 1.49845700  |
| C | -1.83439700 | -0.23807100 | 2.36786500  |
| C | -1.77355400 | 0.15296500  | 0.94099100  |
| C | -2.35616200 | 0.81892600  | 0.03867500  |
| C | -3.44925100 | 1.63102000  | -0.42951600 |
| C | -4.71364900 | 1.45023900  | 0.16306000  |
| C | -3.29370500 | 2.58997500  | -1.44346500 |
| C | -5.79158900 | 2.23374800  | -0.23892300 |
| H | -4.83693900 | 0.68132200  | 0.91924000  |
| C | -4.37714600 | 3.36902500  | -1.83956900 |
| H | -2.32640400 | 2.71059500  | -1.91605000 |
| C | -5.62595700 | 3.19594400  | -1.23819300 |
| H | -6.76441900 | 2.08703100  | 0.22042100  |
| H | -4.24864500 | 4.10964300  | -2.62287600 |
| H | -6.46925000 | 3.80310000  | -1.55283400 |

|    |             |             |             |
|----|-------------|-------------|-------------|
| O  | -1.99789100 | -1.65467200 | 2.52796800  |
| Si | -1.45967300 | -2.42242900 | -0.44353400 |
| C  | 2.81666200  | -2.10066600 | -0.89719200 |
| H  | 2.00307700  | -2.09533100 | -1.62607000 |
| H  | 2.50031900  | -2.71379000 | -0.04688300 |
| C  | 3.09683000  | -0.65546800 | -0.42319300 |
| C  | 4.08129200  | -2.72960300 | -1.51057200 |
| H  | 3.84321900  | -3.74932400 | -1.83695900 |
| C  | 4.53530400  | -1.89009600 | -2.71608600 |
| H  | 3.74194600  | -1.86150300 | -3.47181300 |
| H  | 5.41846600  | -2.34481500 | -3.18282600 |
| C  | 3.60492000  | 0.17916500  | -1.62504500 |
| H  | 3.86692100  | 1.18922300  | -1.29403200 |
| H  | 2.82049000  | 0.26015800  | -2.37756300 |
| C  | 4.86123500  | -0.46379300 | -2.24308700 |
| H  | 5.17598700  | 0.14589200  | -3.09866700 |
| C  | 5.98218800  | -0.50374500 | -1.19261100 |
| H  | 6.89318700  | -0.94232900 | -1.61920000 |
| H  | 6.23425100  | 0.51546100  | -0.87170200 |
| C  | 4.24108300  | -0.70489200 | 0.62316800  |
| H  | 3.95048600  | -1.29901300 | 1.49375200  |
| H  | 4.47727700  | 0.30336100  | 0.98462900  |
| C  | 5.19693700  | -2.76966800 | -0.45240000 |
| H  | 4.88293200  | -3.38213600 | 0.40302500  |
| H  | 6.09976000  | -3.23495400 | -0.86759800 |
| C  | 5.51063400  | -1.33599000 | 0.01043500  |
| H  | 6.29352100  | -1.35769500 | 0.77892300  |
| P  | 1.47382100  | 0.05773600  | 0.32123500  |
| C  | 1.99556200  | 1.86318300  | 0.55482900  |
| H  | 3.08514100  | 1.80210900  | 0.65017700  |

|   |             |             |             |
|---|-------------|-------------|-------------|
| C | 1.49994900  | 2.67244900  | 1.77915700  |
| C | 1.68756600  | 2.69019200  | -0.72758500 |
| H | 1.68086200  | 2.11519000  | 2.69708600  |
| C | 0.00793300  | 3.02263300  | 1.67414200  |
| C | 2.31690100  | 3.98270600  | 1.83695600  |
| H | 1.96219300  | 2.12766900  | -1.61987300 |
| C | 0.19674100  | 3.03824400  | -0.82232200 |
| C | 2.50103100  | 3.99785900  | -0.66460500 |
| H | -0.29400200 | 3.59409400  | 2.56128100  |
| H | -0.59866200 | 2.11626600  | 1.65089200  |
| C | -0.24937100 | 3.85009600  | 0.40240100  |
| H | 3.38551600  | 3.75514300  | 1.94113200  |
| H | 2.02246700  | 4.55474900  | 2.72603000  |
| C | 2.07157400  | 4.81647500  | 0.56703300  |
| H | -0.39301300 | 2.11792600  | -0.90572100 |
| H | 0.01768000  | 3.60331700  | -1.74541800 |
| H | 3.57447600  | 3.77364600  | -0.61651900 |
| H | 2.33491300  | 4.57772900  | -1.58095100 |
| H | -1.31775500 | 4.08176100  | 0.32314900  |
| C | 0.57049800  | 5.15346600  | 0.46327300  |
| H | 2.65511400  | 5.74380100  | 0.61661100  |
| H | 0.38264600  | 5.75828300  | -0.43287300 |
| H | 0.26022500  | 5.75395400  | 1.32791200  |
| C | 1.46460200  | -0.86046800 | 1.95548500  |
| H | 1.95728400  | -1.80576700 | 1.71051400  |
| H | 0.43358600  | -1.14319200 | 2.14924100  |
| C | 2.09456100  | -0.29526900 | 3.23424900  |
| H | 3.02639800  | 0.23770600  | 3.01767500  |
| H | 1.41866800  | 0.43839200  | 3.68850200  |
| C | 2.37001400  | -1.40281200 | 4.25818200  |

|    |             |             |             |
|----|-------------|-------------|-------------|
| H  | 3.07298200  | -2.12546700 | 3.82228100  |
| H  | 1.44096200  | -1.95704000 | 4.44575300  |
| C  | 2.93106000  | -0.86627800 | 5.57631800  |
| H  | 3.12630700  | -1.67483100 | 6.28746400  |
| H  | 3.87238000  | -0.32922000 | 5.41401600  |
| H  | 2.22996300  | -0.16890900 | 6.04849700  |
| Rh | -0.76888000 | -0.23006800 | -0.89148000 |
| Cl | 0.46051700  | -0.37858200 | -2.93135900 |
| H  | -2.48279500 | 0.27999400  | -2.83634500 |
| H  | -3.37288100 | -0.63545400 | -1.61327200 |
| H  | -0.92837100 | 0.02536900  | 2.91583600  |
| H  | -2.67998300 | 0.28655000  | 2.83502600  |

**TS2**

|   |            |            |             |
|---|------------|------------|-------------|
| C | 4.57520700 | 2.88983700 | -0.27520400 |
| C | 3.57640600 | 2.35387400 | 0.55160800  |
| C | 3.96789400 | 1.90434300 | 1.82355700  |
| C | 5.28240100 | 2.00153600 | 2.27354400  |
| C | 6.24995700 | 2.55526000 | 1.43382500  |
| C | 5.89931500 | 2.99266600 | 0.15579500  |
| H | 4.31445600 | 3.23997500 | -1.26923500 |
| H | 5.52740600 | 1.64713500 | 3.26944900  |
| H | 7.27717900 | 2.63668400 | 1.77660400  |
| H | 6.65243800 | 3.41692200 | -0.50113300 |
| C | 1.56144000 | 3.20426000 | -1.58238900 |
| C | 2.30144600 | 0.86238200 | -2.21732900 |
| C | 1.98712500 | 2.26422000 | -2.74181700 |
| H | 2.14481700 | 4.13312000 | -1.54904300 |
| H | 0.51278000 | 3.50429900 | -1.68557700 |
| H | 2.86493700 | 2.67220500 | -3.26364800 |

|    |             |             |             |
|----|-------------|-------------|-------------|
| H  | 1.18665300  | 2.19575800  | -3.48294700 |
| C  | 0.79008600  | 3.18155100  | 1.40639900  |
| H  | 1.28880200  | 4.15000600  | 1.53366600  |
| H  | -0.23992000 | 3.37746000  | 1.10030800  |
| H  | 0.79414300  | 2.68131700  | 2.37424500  |
| C  | 2.33158200  | 0.21400000  | 2.25191900  |
| C  | 2.02134300  | 0.13415700  | 0.79058600  |
| C  | 2.19176100  | -0.77375600 | -0.12194400 |
| C  | 2.89626800  | -1.94157800 | -0.57914300 |
| C  | 3.91818900  | -2.49788900 | 0.21627100  |
| C  | 2.56544300  | -2.55452800 | -1.80121100 |
| C  | 4.56834700  | -3.65784500 | -0.18984100 |
| H  | 4.19571800  | -2.01357400 | 1.14651400  |
| C  | 3.22847500  | -3.71006800 | -2.20379100 |
| H  | 1.78923400  | -2.11603100 | -2.41792900 |
| C  | 4.22324900  | -4.26938800 | -1.39895000 |
| H  | 5.34943400  | -4.08352000 | 0.43265300  |
| H  | 2.96500600  | -4.17678400 | -3.14776100 |
| H  | 4.73363000  | -5.17442300 | -1.71393100 |
| O  | 3.02002400  | 1.39339800  | 2.69094600  |
| Si | 1.75226900  | 2.26701800  | 0.06426700  |
| C  | -2.28060800 | 2.19312200  | -0.99913500 |
| H  | -1.48064000 | 1.94092100  | -1.70106200 |
| H  | -1.83406200 | 2.77913800  | -0.18672900 |
| C  | -2.90306700 | 0.89282100  | -0.42998500 |
| C  | -3.34615500 | 3.03938600  | -1.71781600 |
| H  | -2.87174300 | 3.94710500  | -2.11046900 |
| C  | -3.93990500 | 2.21909300  | -2.87671700 |
| H  | -3.14913500 | 1.94798000  | -3.58574700 |
| H  | -4.67956100 | 2.81870700  | -3.42226500 |

|   |             |             |             |
|---|-------------|-------------|-------------|
| C | -3.54546500 | 0.09190600  | -1.58813300 |
| H | -4.03229800 | -0.80437600 | -1.18723900 |
| H | -2.77754900 | -0.22681900 | -2.29382200 |
| C | -4.60074400 | 0.94756900  | -2.31561100 |
| H | -5.01957700 | 0.35710600  | -3.13926400 |
| C | -5.71625600 | 1.33327500  | -1.33101300 |
| H | -6.48589400 | 1.92914900  | -1.83774900 |
| H | -6.20819900 | 0.43062200  | -0.94606000 |
| C | -4.03498100 | 1.28824700  | 0.54663600  |
| H | -3.63729900 | 1.86886000  | 1.38278600  |
| H | -4.50624000 | 0.39005300  | 0.96301700  |
| C | -4.45582700 | 3.41898600  | -0.72281500 |
| H | -4.03727400 | 4.01365000  | 0.09983900  |
| H | -5.21287600 | 4.04070700  | -1.21687300 |
| C | -5.10489500 | 2.13716000  | -0.17208600 |
| H | -5.88580300 | 2.39988800  | 0.55241800  |
| P | -1.47365900 | -0.07570200 | 0.37878600  |
| C | -2.13950900 | -1.81527800 | 0.64966800  |
| H | -3.20555100 | -1.66385400 | 0.86824000  |
| C | -1.52324100 | -2.56385100 | 1.86266200  |
| C | -2.03243000 | -2.74637800 | -0.58938800 |
| H | -1.54936300 | -1.93184600 | 2.74919400  |
| C | -0.06916700 | -2.98798600 | 1.59238600  |
| C | -2.37656200 | -3.82087700 | 2.13125900  |
| H | -2.39960600 | -2.23727100 | -1.48053700 |
| C | -0.57775700 | -3.17171400 | -0.83798100 |
| C | -2.88577600 | -4.00218600 | -0.31882100 |
| H | 0.32889400  | -3.49379300 | 2.48173700  |
| H | 0.55808800  | -2.10993700 | 1.41261900  |
| C | -0.01746800 | -3.92555100 | 0.37490300  |



|    |             |             |             |
|----|-------------|-------------|-------------|
| H  | -3.41088300 | -3.53010200 | 2.35575200  |
| H  | -1.98983100 | -4.34244800 | 3.01615300  |
| C  | -2.33598100 | -4.75347700 | 0.90813900  |
| H  | 0.02483000  | -2.28911800 | -1.04613500 |
| H  | -0.53279500 | -3.79901000 | -1.73632300 |
| H  | -3.93417000 | -3.72138800 | -0.15258800 |
| H  | -2.86399400 | -4.65474500 | -1.20038400 |
| H  | 1.01976900  | -4.21906800 | 0.17860600  |
| C  | -0.87670200 | -5.17479900 | 0.64485700  |
| H  | -2.94864800 | -5.64240600 | 1.10219500  |
| H  | -0.83150900 | -5.85225500 | -0.21716700 |
| H  | -0.48488400 | -5.72691900 | 1.50904300  |
| C  | -1.40701900 | 0.65889400  | 2.09541300  |
| H  | -1.38794100 | 1.73492200  | 1.90785800  |
| H  | -0.41285800 | 0.42603100  | 2.47766800  |
| C  | -2.45676000 | 0.35561100  | 3.18706700  |
| H  | -3.40071200 | 0.00841000  | 2.76055100  |
| H  | -2.10173200 | -0.45965400 | 3.82517400  |
| C  | -2.72180900 | 1.57500700  | 4.07857800  |
| H  | -3.09284600 | 2.40327300  | 3.46041100  |
| H  | -1.77119600 | 1.91991400  | 4.50671100  |
| C  | -3.72118900 | 1.28245400  | 5.19894100  |
| H  | -3.89544900 | 2.16535700  | 5.82162600  |
| H  | -4.68720600 | 0.96563100  | 4.78995900  |
| H  | -3.35943600 | 0.47978500  | 5.85125500  |
| Rh | 0.71173200  | 0.31583600  | -0.90454700 |
| Cl | -0.36289200 | -0.26641500 | -2.95583100 |
| H  | 2.31579100  | 0.11365100  | -3.00922100 |
| H  | 3.26868000  | 0.83694000  | -1.70293900 |
| H  | 1.42281000  | 0.18189300  | 2.85761700  |

|          |             |             |             |
|----------|-------------|-------------|-------------|
| H        | 2.93735800  | -0.66555200 | 2.50717600  |
| <b>C</b> |             |             |             |
| C        | -7.35968300 | -1.26803600 | 0.99734500  |
| C        | -6.04369300 | -1.71251800 | 1.14690500  |
| C        | -5.08877300 | -1.50587500 | 0.14331800  |
| C        | -5.49241200 | -0.80715400 | -1.01144000 |
| C        | -6.80012200 | -0.35137700 | -1.17423800 |
| C        | -7.73514600 | -0.59248000 | -0.16550300 |
| H        | -8.08872300 | -1.44935900 | 1.78138300  |
| H        | -5.76014500 | -2.23492800 | 2.05720900  |
| H        | -7.06768900 | 0.17317700  | -2.08569500 |
| H        | -8.75732800 | -0.24598400 | -0.28749600 |
| O        | -4.59978400 | -0.62583900 | -2.04634600 |
| C        | -3.39335100 | 0.11972000  | -1.78625400 |
| H        | -2.72495400 | -0.12754400 | -2.61386800 |
| H        | -3.62790700 | 1.19206800  | -1.82426800 |
| C        | -2.69956100 | -0.22221100 | -0.46573400 |
| C        | -2.06363300 | 0.79906300  | 0.19524100  |
| C        | -0.71470200 | -0.52302100 | 1.97384700  |
| C        | -2.64929400 | -2.19291600 | 1.95514300  |
| C        | -2.05643900 | -0.92360200 | 2.58587700  |
| H        | -0.35427000 | 0.37471300  | 2.48096100  |
| H        | -3.48166700 | -2.57304200 | 2.56042400  |
| H        | -1.88772400 | -2.98338200 | 1.94529400  |
| H        | -1.89902200 | -1.09055300 | 3.66235800  |
| Si       | -3.25098200 | -1.89792300 | 0.19917600  |
| C        | -2.78779200 | -3.27152400 | -0.99074600 |
| H        | -3.18982900 | -3.06271500 | -1.98531500 |
| H        | -1.69972700 | -3.34253700 | -1.07777400 |

|   |             |             |             |
|---|-------------|-------------|-------------|
| H | -3.18461000 | -4.23387100 | -0.64911400 |
| C | -2.43205300 | 2.08938200  | 0.70725900  |
| C | -3.79769200 | 2.42739200  | 0.82687100  |
| C | -1.45453100 | 3.00757800  | 1.12798700  |
| C | -4.16351200 | 3.66921400  | 1.33337400  |
| H | -4.54954200 | 1.70441000  | 0.52651700  |
| C | -1.82510100 | 4.24671100  | 1.63554400  |
| H | -0.41633500 | 2.72017200  | 1.04038500  |
| C | -3.17988000 | 4.57981800  | 1.73428000  |
| H | -5.21355600 | 3.92907800  | 1.42317600  |
| H | -1.06444400 | 4.95288700  | 1.95350300  |
| H | -3.47073000 | 5.54830500  | 2.13002800  |
| H | -0.00120000 | -1.33213500 | 2.16244600  |
| H | -2.77974000 | -0.10059400 | 2.52011500  |
| C | 1.80434000  | -2.71649300 | 0.36799700  |
| H | 0.84345700  | -2.60638200 | -0.14830600 |
| H | 1.60604700  | -2.62995600 | 1.44375300  |
| C | 2.76975900  | -1.59248800 | -0.08604500 |
| C | 2.40211200  | -4.10207900 | 0.06613400  |
| H | 1.69614300  | -4.87256800 | 0.39945300  |
| C | 2.63774300  | -4.23067700 | -1.44872600 |
| H | 1.68862700  | -4.12131600 | -1.98630500 |
| H | 3.03602400  | -5.22564600 | -1.68472700 |
| C | 3.03607600  | -1.75103000 | -1.60385500 |
| H | 3.74606400  | -0.98866500 | -1.94334600 |
| H | 2.11066900  | -1.61101300 | -2.16274400 |
| C | 3.62559500  | -3.14236200 | -1.90384400 |
| H | 3.78934600  | -3.22390600 | -2.98492200 |
| C | 4.96072600  | -3.30765300 | -1.16010500 |
| H | 5.40298900  | -4.28796300 | -1.37833700 |

|   |            |             |             |
|---|------------|-------------|-------------|
| H | 5.67719500 | -2.54793300 | -1.49852600 |
| C | 4.11219400 | -1.77804400 | 0.65668400  |
| H | 3.96679600 | -1.69329200 | 1.73689200  |
| H | 4.82254200 | -0.99773100 | 0.35679200  |
| C | 3.73621300 | -4.25870300 | 0.81656800  |
| H | 3.57157200 | -4.18101900 | 1.89935000  |
| H | 4.16360500 | -5.25103500 | 0.62610900  |
| C | 4.71449600 | -3.16580500 | 0.35077400  |
| H | 5.66270500 | -3.26245100 | 0.89423700  |
| P | 1.90149100 | 0.06417300  | 0.28148200  |
| C | 2.88276300 | 1.31745100  | -0.74032400 |
| H | 3.80361900 | 0.77706400  | -0.98780600 |
| C | 3.31666800 | 2.63265900  | -0.04747100 |
| C | 2.16204000 | 1.67770500  | -2.06605000 |
| H | 3.83287000 | 2.41627800  | 0.88497500  |
| C | 2.10989000 | 3.54107000  | 0.22590700  |
| C | 4.30156600 | 3.37254800  | -0.97818300 |
| H | 1.81248200 | 0.77073100  | -2.55984800 |
| C | 0.95083100 | 2.58460400  | -1.78541300 |
| C | 3.14914700 | 2.42467600  | -2.98244500 |
| H | 2.44504600 | 4.45856700  | 0.72662200  |
| H | 1.42151600 | 3.04068600  | 0.91490000  |
| C | 1.40394300 | 3.88368400  | -1.09900300 |
| H | 5.18304500 | 2.74545800  | -1.16355600 |
| H | 4.65512500 | 4.28308200  | -0.47736900 |
| C | 3.61181600 | 3.72672300  | -2.30544900 |
| H | 0.22508900 | 2.04960900  | -1.16430100 |
| H | 0.44266800 | 2.80906700  | -2.73060100 |
| H | 4.01505200 | 1.78776600  | -3.20623400 |
| H | 2.65918700 | 2.64600200  | -3.93851500 |

|    |             |             |             |
|----|-------------|-------------|-------------|
| H  | 0.53297500  | 4.51973900  | -0.89776000 |
| C  | 2.39272000  | 4.62630400  | -2.01918400 |
| H  | 4.31614900  | 4.25720200  | -2.95786800 |
| H  | 1.89572000  | 4.89458000  | -2.95961300 |
| H  | 2.72053500  | 5.56270800  | -1.54888600 |
| C  | 2.28194200  | 0.38895100  | 2.08195800  |
| H  | 1.94352700  | -0.52798900 | 2.57407700  |
| H  | 1.56476800  | 1.15146400  | 2.39609400  |
| C  | 3.68241800  | 0.75677800  | 2.62111600  |
| H  | 4.47625200  | 0.50174000  | 1.91545500  |
| H  | 3.74115200  | 1.84073700  | 2.76383500  |
| C  | 3.97155900  | 0.08225700  | 3.96776800  |
| H  | 3.92018400  | -1.00791400 | 3.84513400  |
| H  | 3.17697000  | 0.34474700  | 4.67874600  |
| C  | 5.33435500  | 0.47131600  | 4.54303400  |
| H  | 5.51985900  | -0.02069400 | 5.50278100  |
| H  | 6.14347600  | 0.18850200  | 3.86029900  |
| H  | 5.40090800  | 1.55314800  | 4.70385000  |
| Rh | -0.52380400 | -0.23427900 | -0.12984400 |
| Cl | -0.16078000 | -0.83878500 | -2.45332600 |

**TS3**

|   |             |             |             |
|---|-------------|-------------|-------------|
| C | -7.22310000 | -2.15140000 | 1.19330000  |
| C | -5.85570000 | -2.21930000 | 1.47030000  |
| C | -4.90540000 | -1.85190000 | 0.51040000  |
| C | -5.36880000 | -1.39310000 | -0.73650000 |
| C | -6.72950000 | -1.32100000 | -1.03010000 |
| C | -7.65470000 | -1.70780000 | -0.05870000 |
| H | -7.94800000 | -2.44660000 | 1.94600000  |
| H | -5.52750000 | -2.57040000 | 2.44620000  |

|    |             |             |             |
|----|-------------|-------------|-------------|
| H  | -7.04310000 | -0.97130000 | -2.00820000 |
| H  | -8.71710000 | -1.65660000 | -0.27930000 |
| O  | -4.45720000 | -1.07710000 | -1.72360000 |
| C  | -3.55130000 | 0.02250000  | -1.46690000 |
| H  | -2.88910000 | 0.01980000  | -2.33520000 |
| H  | -4.13070000 | 0.95470000  | -1.45990000 |
| C  | -2.76400000 | -0.13250000 | -0.18050000 |
| C  | -2.27380000 | 0.98240000  | 0.52340000  |
| C  | -1.47410000 | 0.73060000  | 2.31130000  |
| C  | -2.45900000 | -1.62710000 | 2.44540000  |
| C  | -2.29540000 | -0.27200000 | 3.14790000  |
| H  | -1.07780000 | 1.53420000  | 2.93240000  |
| H  | -3.10940000 | -2.18880000 | 3.12580000  |
| H  | -1.45970000 | -2.07290000 | 2.52840000  |
| H  | -1.80890000 | -0.39810000 | 4.12280000  |
| Si | -3.03760000 | -1.79250000 | 0.65310000  |
| C  | -2.25070000 | -3.24930000 | -0.22900000 |
| H  | -2.48090000 | -3.19800000 | -1.29630000 |
| H  | -1.16470000 | -3.22740000 | -0.11460000 |
| H  | -2.63190000 | -4.19750000 | 0.16570000  |
| C  | -2.44240000 | 2.39530000  | 0.09020000  |
| C  | -2.81390000 | 3.37730000  | 1.02120000  |
| C  | -2.22610000 | 2.78520000  | -1.24200000 |
| C  | -2.96100000 | 4.70920000  | 0.63540000  |
| H  | -3.00560000 | 3.09720000  | 2.05270000  |
| C  | -2.37440000 | 4.11490000  | -1.62720000 |
| H  | -1.88540000 | 2.05070000  | -1.96240000 |
| C  | -2.74250000 | 5.08320000  | -0.69080000 |
| H  | -3.24920000 | 5.45350000  | 1.37170000  |
| H  | -2.18480000 | 4.39730000  | -2.65820000 |

|   |             |             |             |
|---|-------------|-------------|-------------|
| H | -2.85120000 | 6.12080000  | -0.99110000 |
| H | -0.75060000 | -0.05140000 | 2.43760000  |
| H | -3.27550000 | 0.17950000  | 3.34020000  |
| C | 2.39730000  | -1.73340000 | 0.41330000  |
| H | 1.49550000  | -1.60770000 | -0.18980000 |
| H | 2.07970000  | -2.04680000 | 1.41690000  |
| C | 3.15000000  | -0.38130000 | 0.49640000  |
| C | 3.29880000  | -2.81410000 | -0.20890000 |
| H | 2.73980000  | -3.75650000 | -0.25460000 |
| C | 3.69500000  | -2.37650000 | -1.63030000 |
| H | 2.79650000  | -2.24720000 | -2.24450000 |
| H | 4.31030000  | -3.15070000 | -2.10610000 |
| C | 3.59210000  | 0.03950000  | -0.92630000 |
| H | 4.16730000  | 0.97060000  | -0.87120000 |
| H | 2.71550000  | 0.21940000  | -1.55080000 |
| C | 4.47620000  | -1.05280000 | -1.55770000 |
| H | 4.75510000  | -0.73380000 | -2.56900000 |
| C | 5.74050000  | -1.24180000 | -0.70370000 |
| H | 6.39340000  | -2.00330000 | -1.14840000 |
| H | 6.31400000  | -0.30650000 | -0.66700000 |
| C | 4.42470000  | -0.58630000 | 1.34720000  |
| H | 4.16210000  | -0.90560000 | 2.35890000  |
| H | 4.98430000  | 0.35350000  | 1.43090000  |
| C | 4.56030000  | -2.99760000 | 0.65130000  |
| H | 4.28350000  | -3.32240000 | 1.66300000  |
| H | 5.20090000  | -3.78030000 | 0.22600000  |
| C | 5.32900000  | -1.66620000 | 0.71560000  |
| H | 6.22130000  | -1.78340000 | 1.34310000  |
| P | 1.93030000  | 0.87830000  | 1.21690000  |
| C | 2.70950000  | 2.56490000  | 0.96760000  |

|   |             |             |             |
|---|-------------|-------------|-------------|
| H | 3.78930000  | 2.38050000  | 1.05890000  |
| C | 2.32730000  | 3.61570000  | 2.04470000  |
| C | 2.44840000  | 3.19630000  | -0.43050000 |
| H | 2.46170000  | 3.19960000  | 3.04340000  |
| C | 0.87090000  | 4.08700000  | 1.88250000  |
| C | 3.27300000  | 4.82410000  | 1.88630000  |
| H | 2.64570000  | 2.46740000  | -1.21760000 |
| C | 0.99670000  | 3.68340000  | -0.56870000 |
| C | 3.39900000  | 4.40110000  | -0.58570000 |
| H | 0.63080000  | 4.80030000  | 2.68150000  |
| H | 0.18420000  | 3.23990000  | 1.98100000  |
| C | 0.67790000  | 4.73450000  | 0.50190000  |
| H | 4.31350000  | 4.50460000  | 2.02820000  |
| H | 3.05460000  | 5.56400000  | 2.66700000  |
| C | 3.09010000  | 5.45520000  | 0.49490000  |
| H | 0.31480000  | 2.83620000  | -0.47460000 |
| H | 0.85250000  | 4.10070000  | -1.57270000 |
| H | 4.44460000  | 4.07510000  | -0.50770000 |
| H | 3.27270000  | 4.83860000  | -1.58370000 |
| H | -0.36070000 | 5.06460000  | 0.39450000  |
| C | 1.63210000  | 5.93320000  | 0.35020000  |
| H | 3.77270000  | 6.30680000  | 0.38480000  |
| H | 1.48590000  | 6.40350000  | -0.63050000 |
| H | 1.41230000  | 6.69590000  | 1.10870000  |
| C | 2.00640000  | 0.57290000  | 3.06490000  |
| H | 1.81590000  | -0.50370000 | 3.14880000  |
| H | 1.11730000  | 1.05580000  | 3.47950000  |
| C | 3.23560000  | 0.95920000  | 3.91880000  |
| H | 4.12110000  | 1.12450000  | 3.30100000  |
| H | 3.04410000  | 1.91350000  | 4.42070000  |



|    |             |             |             |
|----|-------------|-------------|-------------|
| C  | 3.55360000  | -0.09090000 | 4.98980000  |
| H  | 3.74840000  | -1.05680000 | 4.50490000  |
| H  | 2.66690000  | -0.24160000 | 5.61970000  |
| C  | 4.74980000  | 0.29710000  | 5.86070000  |
| H  | 4.95780000  | -0.46410000 | 6.61890000  |
| H  | 5.65320000  | 0.41920000  | 5.25270000  |
| H  | 4.56980000  | 1.24520000  | 6.37950000  |
| Rh | -0.29760000 | 0.60840000  | 0.57730000  |
| Cl | 0.18950000  | 0.28800000  | -1.69510000 |

**3a**

|   |             |             |             |
|---|-------------|-------------|-------------|
| C | -7.75467700 | 0.41437500  | 0.05868100  |
| C | -6.59626300 | 0.89111200  | 0.67821200  |
| C | -5.36773600 | 0.24456800  | 0.49925100  |
| C | -5.33807300 | -0.87668000 | -0.33970400 |
| C | -6.47735700 | -1.37092300 | -0.96938200 |
| C | -7.69373600 | -0.71766500 | -0.75755200 |
| H | -8.70297600 | 0.92039100  | 0.21365900  |
| H | -6.65422900 | 1.77122900  | 1.31403400  |
| H | -6.40368500 | -2.24943300 | -1.60221500 |
| H | -8.59412400 | -1.09080000 | -1.23689100 |
| O | -4.13166900 | -1.54006800 | -0.49969500 |
| C | -3.08357600 | -0.78715200 | -1.13647200 |
| H | -2.27814200 | -1.51878800 | -1.21343500 |
| H | -3.43017600 | -0.52235800 | -2.14394800 |
| C | -2.64469700 | 0.47646600  | -0.36962900 |
| C | -2.07396100 | 1.64169700  | -0.95635700 |
| C | -2.30127900 | 3.04811000  | -0.39329000 |
| C | -3.65724300 | 2.46971400  | 1.70647700  |
| C | -3.58956100 | 3.28313300  | 0.40581300  |

|    |             |             |             |
|----|-------------|-------------|-------------|
| H  | -2.32769600 | 3.73498400  | -1.24526200 |
| H  | -4.55867000 | 2.72608400  | 2.27657800  |
| H  | -2.79124700 | 2.68494600  | 2.33810600  |
| H  | -3.65133900 | 4.35742500  | 0.62035000  |
| Si | -3.68006600 | 0.65971800  | 1.22521800  |
| C  | -3.32120000 | -0.58797000 | 2.58128900  |
| H  | -3.38508400 | -1.60123000 | 2.17659700  |
| H  | -2.32959100 | -0.42887200 | 3.00548600  |
| H  | -4.07429700 | -0.48891300 | 3.37111700  |
| C  | -1.14186600 | 1.54294700  | -2.10264100 |
| C  | -0.88405300 | 0.31157700  | -2.78426700 |
| C  | -0.35258800 | 2.67161400  | -2.50908900 |
| C  | 0.04891500  | 0.25738400  | -3.84468300 |
| H  | -1.52914200 | -0.54009900 | -2.67661600 |
| C  | 0.56596300  | 2.58289500  | -3.53118000 |
| H  | -0.47598900 | 3.61617900  | -1.99801500 |
| C  | 0.76638700  | 1.37068800  | -4.22554400 |
| H  | 0.17096000  | -0.68169500 | -4.37708100 |
| H  | 1.13781200  | 3.46360400  | -3.80847800 |
| H  | 1.47347400  | 1.32082500  | -5.04744300 |
| H  | -1.44050500 | 3.33660500  | 0.22095700  |
| H  | -4.45419000 | 3.04673000  | -0.22863100 |
| C  | 2.68852300  | 2.24802700  | 0.46582600  |
| H  | 1.64436200  | 2.42717100  | 0.73092500  |
| H  | 2.78613100  | 2.42676800  | -0.61340200 |
| C  | 3.05729000  | 0.77688500  | 0.78819400  |
| C  | 3.60645400  | 3.21063900  | 1.24023300  |
| H  | 3.32088300  | 4.24223800  | 1.00019600  |
| C  | 3.43349700  | 2.96298600  | 2.74986900  |
| H  | 2.38967400  | 3.13260400  | 3.03782700  |

|   |             |             |             |
|---|-------------|-------------|-------------|
| H | 4.05187000  | 3.66745100  | 3.32082800  |
| C | 2.93681500  | 0.53403700  | 2.31221000  |
| H | 3.24462700  | -0.49217500 | 2.54626700  |
| H | 1.90154300  | 0.65675000  | 2.62890900  |
| C | 3.84008300  | 1.51592600  | 3.08268100  |
| H | 3.71353700  | 1.33641700  | 4.15711300  |
| C | 5.30621900  | 1.28334300  | 2.68453300  |
| H | 5.96706200  | 1.96239600  | 3.23817300  |
| H | 5.60846500  | 0.25934300  | 2.93996200  |
| C | 4.53654400  | 0.55353800  | 0.39580900  |
| H | 4.67902800  | 0.72785000  | -0.67314900 |
| H | 4.83497000  | -0.48072700 | 0.60636300  |
| C | 5.07124100  | 2.96921000  | 0.83759800  |
| H | 5.20273100  | 3.15550400  | -0.23649600 |
| H | 5.73249600  | 3.66540500  | 1.36879500  |
| C | 5.45708700  | 1.51814600  | 1.17297800  |
| H | 6.49430900  | 1.33054800  | 0.86805900  |
| P | 1.83961700  | -0.30815700 | -0.17718000 |
| C | 1.98277500  | -2.03475100 | 0.54212400  |
| H | 3.02744900  | -2.10634300 | 0.87482800  |
| C | 1.74170000  | -3.17905600 | -0.47776200 |
| C | 1.06764100  | -2.28700500 | 1.77314600  |
| H | 2.34419000  | -3.02120700 | -1.37173200 |
| C | 0.25783600  | -3.27204800 | -0.87670200 |
| C | 2.17975600  | -4.50438700 | 0.17848400  |
| H | 1.16331100  | -1.46874900 | 2.48887000  |
| C | -0.41017500 | -2.41294400 | 1.36605900  |
| C | 1.51046900  | -3.61205600 | 2.42782500  |
| H | 0.13175800  | -4.06640300 | -1.62360000 |
| H | -0.06434500 | -2.33175300 | -1.34217400 |

|    |             |             |             |
|----|-------------|-------------|-------------|
| C  | -0.60060100 | -3.56008000 | 0.36713800  |
| H  | 3.24453400  | -4.45587100 | 0.44035000  |
| H  | 2.06251200  | -5.32518500 | -0.54062700 |
| C  | 1.33056600  | -4.77478500 | 1.43241900  |
| H  | -0.76394200 | -1.47082000 | 0.92550600  |
| H  | -1.01568100 | -2.57768500 | 2.26378000  |
| H  | 2.55890200  | -3.54710000 | 2.74715000  |
| H  | 0.91098700  | -3.79210700 | 3.32856100  |
| H  | -1.65765300 | -3.62703500 | 0.08174400  |
| C  | -0.15007900 | -4.88188400 | 1.01779300  |
| H  | 1.65223600  | -5.71335200 | 1.89998000  |
| H  | -0.77295000 | -5.09427800 | 1.89544800  |
| H  | -0.28312900 | -5.71727800 | 0.31820600  |
| C  | 2.58029800  | -0.42390400 | -1.87821500 |
| H  | 2.69616000  | 0.62254400  | -2.18125300 |
| H  | 1.77201700  | -0.79687000 | -2.50509600 |
| C  | 3.87452300  | -1.21135300 | -2.18607900 |
| H  | 4.45403500  | -1.42705800 | -1.28583100 |
| H  | 3.61159200  | -2.18722500 | -2.60826200 |
| C  | 4.76315100  | -0.48123400 | -3.20023800 |
| H  | 5.04170900  | 0.50191500  | -2.79825800 |
| H  | 4.17765800  | -0.28099700 | -4.10758500 |
| C  | 6.02556800  | -1.26737100 | -3.55696000 |
| H  | 6.64224900  | -0.72915200 | -4.28346500 |
| H  | 6.63871400  | -1.44821700 | -2.66696800 |
| H  | 5.77490000  | -2.24272800 | -3.98887900 |
| Rh | -0.39862100 | 0.46620700  | -0.29163000 |
| Cl | -0.40268200 | 1.17303000  | 1.98660300  |

**TS4**

|   |             |             |             |
|---|-------------|-------------|-------------|
| C | -6.08600000 | -2.77140000 | -0.67230000 |
| C | -5.38190000 | -1.66000000 | -0.17270000 |
| C | -6.10090000 | -0.73660000 | 0.61350000  |
| C | -7.47040000 | -0.91350000 | 0.85820000  |
| C | -8.13540000 | -2.01490000 | 0.33300000  |
| C | -7.44390000 | -2.95810000 | -0.43420000 |
| H | -5.55350000 | -3.49870000 | -1.28230000 |
| H | -7.98530000 | -0.17590000 | 1.46490000  |
| H | -9.19590000 | -2.14320000 | 0.53020000  |
| H | -7.96090000 | -3.82110000 | -0.84230000 |
| C | -3.19800000 | -1.12160000 | -2.43820000 |
| C | -2.04680000 | 1.09130000  | -1.78360000 |
| C | -3.00620000 | 0.37530000  | -2.75730000 |
| H | -3.97570000 | -1.55510000 | -3.07620000 |
| H | -2.27070000 | -1.66730000 | -2.65650000 |
| H | -3.97530000 | 0.88970000  | -2.73660000 |
| H | -2.60900000 | 0.48760000  | -3.77410000 |
| C | -2.49800000 | -2.71350000 | 0.13260000  |
| H | -2.46130000 | -2.66130000 | 1.22560000  |
| H | -2.90000000 | -3.69630000 | -0.13920000 |
| H | -1.48250000 | -2.65410000 | -0.27010000 |
| C | -4.15870000 | 0.46780000  | 1.45820000  |
| C | -3.32340000 | 0.31330000  | 0.21200000  |
| C | -2.60410000 | 1.29780000  | -0.38030000 |
| C | -2.29390000 | 2.59560000  | 0.27760000  |
| C | -1.85520000 | 2.64190000  | 1.61350000  |
| C | -2.38840000 | 3.81320000  | -0.41890000 |
| C | -1.53140000 | 3.84870000  | 2.23180000  |
| H | -1.74080000 | 1.71360000  | 2.16030000  |
| C | -2.06950000 | 5.02250000  | 0.19700000  |

|    |             |             |             |
|----|-------------|-------------|-------------|
| H  | -2.73830000 | 3.81430000  | -1.44600000 |
| C  | -1.63680000 | 5.04700000  | 1.52490000  |
| H  | -1.19100000 | 3.85050000  | 3.26310000  |
| H  | -2.16520000 | 5.95000000  | -0.35970000 |
| H  | -1.38390000 | 5.98890000  | 2.00180000  |
| O  | -5.56820000 | 0.40040000  | 1.16310000  |
| Si | -3.58540000 | -1.35370000 | -0.59980000 |
| C  | 1.90020000  | -2.85230000 | -1.84880000 |
| H  | 0.87370000  | -2.63000000 | -2.15480000 |
| H  | 1.85340000  | -3.40870000 | -0.90590000 |
| C  | 2.68720000  | -1.53240000 | -1.64800000 |
| C  | 2.59310000  | -3.73010000 | -2.90830000 |
| H  | 2.01250000  | -4.65190000 | -3.03370000 |
| C  | 2.66380000  | -2.97460000 | -4.24640000 |
| H  | 1.65280000  | -2.73880000 | -4.59820000 |
| H  | 3.13700000  | -3.60560000 | -5.00940000 |
| C  | 2.76530000  | -0.79480000 | -3.00990000 |
| H  | 3.30700000  | 0.15090000  | -2.89960000 |
| H  | 1.75380000  | -0.54260000 | -3.33970000 |
| C  | 3.46880000  | -1.67760000 | -4.05540000 |
| H  | 3.51780000  | -1.12960000 | -5.00390000 |
| C  | 4.89180000  | -2.01330000 | -3.57510000 |
| H  | 5.41070000  | -2.62510000 | -4.32330000 |
| H  | 5.47580000  | -1.09170000 | -3.45160000 |
| C  | 4.12200000  | -1.88740000 | -1.18190000 |
| H  | 4.09460000  | -2.41960000 | -0.22540000 |
| H  | 4.71790000  | -0.98340000 | -1.02660000 |
| C  | 4.01520000  | -4.07290000 | -2.43180000 |
| H  | 3.97310000  | -4.63340000 | -1.48890000 |
| H  | 4.51700000  | -4.71570000 | -3.16600000 |

|   |            |             |             |
|---|------------|-------------|-------------|
| C | 4.81530000 | -2.77280000 | -2.23890000 |
| H | 5.82760000 | -3.00870000 | -1.88790000 |
| P | 1.75810000 | -0.43170000 | -0.43110000 |
| C | 3.01300000 | 0.64330000  | 0.44340000  |
| H | 3.70070000 | -0.05950000 | 0.93050000  |
| C | 2.33120000 | 1.49600000  | 1.54060000  |
| C | 3.84550000 | 1.58390000  | -0.46470000 |
| H | 1.70590000 | 0.86870000  | 2.17700000  |
| C | 1.47200000 | 2.60930000  | 0.91930000  |
| C | 3.42490000 | 2.15370000  | 2.40630000  |
| H | 4.31820000 | 1.01240000  | -1.26710000 |
| C | 2.96840000 | 2.68990000  | -1.07770000 |
| C | 4.94420000 | 2.23230000  | 0.40380000  |
| H | 0.96560000 | 3.16830000  | 1.71400000  |
| H | 0.62840000 | 2.17480000  | 0.33020000  |
| C | 2.32640000 | 3.52850000  | 0.03860000  |
| H | 4.03470000 | 1.37710000  | 2.88470000  |
| H | 2.95410000 | 2.72890000  | 3.21090000  |
| C | 4.30300000 | 3.06460000  | 1.52980000  |
| H | 2.17980000 | 2.24240000  | -1.70970000 |
| H | 3.57770000 | 3.32310000  | -1.73390000 |
| H | 5.59340000 | 1.45530000  | 0.82720000  |
| H | 5.57690000 | 2.87220000  | -0.22360000 |
| H | 1.69750000 | 4.31140000  | -0.40060000 |
| C | 3.42650000 | 4.16880000  | 0.90900000  |
| H | 5.08920000 | 3.52020000  | 2.14340000  |
| H | 4.04110000 | 4.84020000  | 0.29710000  |
| H | 2.97190000 | 4.77860000  | 1.69950000  |
| C | 1.09280000 | -1.53750000 | 0.89690000  |
| H | 0.48830000 | -2.28210000 | 0.37410000  |

|    |             |             |             |
|----|-------------|-------------|-------------|
| H  | 0.37450000  | -0.92850000 | 1.45080000  |
| C  | 2.05680000  | -2.21340000 | 1.87750000  |
| H  | 2.86220000  | -2.73080000 | 1.34600000  |
| H  | 2.53910000  | -1.45370000 | 2.50570000  |
| C  | 1.32700000  | -3.22580000 | 2.76940000  |
| H  | 0.95540000  | -4.04650000 | 2.14300000  |
| H  | 0.43470000  | -2.75300000 | 3.19690000  |
| C  | 2.20690000  | -3.77910000 | 3.89120000  |
| H  | 1.66750000  | -4.51120000 | 4.49990000  |
| H  | 3.09900000  | -4.27120000 | 3.48790000  |
| H  | 2.54540000  | -2.97650000 | 4.55680000  |
| Rh | 0.21220000  | 0.87230000  | -1.24320000 |
| Cl | 0.81830000  | 1.82410000  | -3.21040000 |
| H  | -0.91710000 | -0.29130000 | -1.41800000 |
| H  | -1.76890000 | 2.06260000  | -2.20010000 |
| H  | -4.04510000 | 1.43840000  | 1.94200000  |
| H  | -3.92550000 | -0.31740000 | 2.19430000  |

**D**

|   |             |             |             |
|---|-------------|-------------|-------------|
| C | -5.39062000 | -2.81309500 | -0.02599800 |
| C | -4.39580400 | -1.89089200 | 0.34904500  |
| C | -4.78495900 | -0.82087700 | 1.18386900  |
| C | -6.11801200 | -0.68242600 | 1.59794800  |
| C | -7.07222700 | -1.61054500 | 1.20069600  |
| C | -6.71359100 | -2.68985800 | 0.38631700  |
| H | -5.11636000 | -3.64427900 | -0.67291000 |
| H | -6.37525100 | 0.15831500  | 2.23365500  |
| H | -8.10057600 | -1.49376400 | 1.53055200  |
| H | -7.45762100 | -3.41666100 | 0.07584100  |
| C | -2.47797600 | -2.23546400 | -2.16037500 |



|    |             |             |             |
|----|-------------|-------------|-------------|
| C  | -2.23296600 | 0.38420000  | -2.27864000 |
| C  | -2.57088800 | -0.92221200 | -2.96920900 |
| H  | -3.20876900 | -2.95861800 | -2.53940900 |
| H  | -1.49362900 | -2.69234200 | -2.32202100 |
| H  | -3.60481400 | -0.80294400 | -3.32670400 |
| H  | -1.95084300 | -0.99144000 | -3.86899400 |
| C  | -1.72910300 | -3.37004800 | 0.61312700  |
| H  | -1.71288900 | -3.19613000 | 1.69377300  |
| H  | -2.25737700 | -4.31648700 | 0.44993600  |
| H  | -0.70219700 | -3.49450800 | 0.26385900  |
| C  | -2.52230900 | 0.02235800  | 1.52859400  |
| C  | -2.09607000 | -0.24843500 | 0.09552900  |
| C  | -2.43057900 | 0.72423800  | -0.92363800 |
| C  | -2.76996500 | 2.14195200  | -0.60252400 |
| C  | -2.07339800 | 2.89639900  | 0.35211800  |
| C  | -3.83411300 | 2.74783100  | -1.28602300 |
| C  | -2.42634400 | 4.21795400  | 0.61449100  |
| H  | -1.23254600 | 2.45596300  | 0.87229500  |
| C  | -4.19691400 | 4.06614200  | -1.01710300 |
| H  | -4.38586200 | 2.16986900  | -2.02047100 |
| C  | -3.49277700 | 4.80669900  | -0.06641800 |
| H  | -1.86531900 | 4.78828200  | 1.34888500  |
| H  | -5.02888200 | 4.51523800  | -1.55091100 |
| H  | -3.77208600 | 5.83505700  | 0.14140200  |
| O  | -3.95167900 | 0.16414800  | 1.64392300  |
| Si | -2.63825300 | -1.99228200 | -0.29987200 |
| C  | 1.90946300  | -2.85563900 | -0.25851000 |
| H  | 1.04158000  | -2.74262200 | -0.91782000 |
| H  | 1.53216800  | -3.11225100 | 0.73753700  |
| C  | 2.69536300  | -1.52214700 | -0.21098400 |

|   |            |             |             |
|---|------------|-------------|-------------|
| C | 2.80481600 | -3.99709000 | -0.77492500 |
| H | 2.21812300 | -4.92377800 | -0.79226200 |
| C | 3.29574700 | -3.66169600 | -2.19353800 |
| H | 2.44118200 | -3.55782900 | -2.87351600 |
| H | 3.91932300 | -4.47856900 | -2.57806500 |
| C | 3.19433100 | -1.21247200 | -1.64443700 |
| H | 3.74879900 | -0.27067800 | -1.66191300 |
| H | 2.34250100 | -1.07285500 | -2.31291600 |
| C | 4.09751500 | -2.34962300 | -2.15495200 |
| H | 4.43938000 | -2.09638700 | -3.16516500 |
| C | 5.30829900 | -2.51124600 | -1.21977300 |
| H | 5.97041400 | -3.30525500 | -1.58751400 |
| H | 5.89592300 | -1.58449900 | -1.20147700 |
| C | 3.91739300 | -1.71275700 | 0.72370400  |
| H | 3.59497700 | -1.95323500 | 1.73808900  |
| H | 4.50366800 | -0.79293300 | 0.78762700  |
| C | 4.01239700 | -4.16306600 | 0.16403700  |
| H | 3.67217900 | -4.42296400 | 1.17498600  |
| H | 4.64858000 | -4.98655200 | -0.18322300 |
| C | 4.81559600 | -2.85128600 | 0.19725300  |
| H | 5.67288000 | -2.96021700 | 0.87285800  |
| P | 1.50707400 | -0.16753100 | 0.34614800  |
| C | 2.53396500 | 1.26520500  | 1.00273000  |
| H | 2.91758000 | 0.87471300  | 1.95371100  |
| C | 1.63442400 | 2.48813200  | 1.32485200  |
| C | 3.76238000 | 1.76570600  | 0.20013600  |
| H | 0.73460000 | 2.15932000  | 1.85984100  |
| C | 1.23308300 | 3.22881300  | 0.03595600  |
| C | 2.42744200 | 3.44969300  | 2.23245600  |
| H | 4.40584600 | 0.92563800  | -0.06700100 |

|   |             |             |             |
|---|-------------|-------------|-------------|
| C | 3.35325100  | 2.51670300  | -1.07524300 |
| C | 4.55659900  | 2.71944800  | 1.11947700  |
| H | 0.57347800  | 4.06768000  | 0.28398500  |
| H | 0.66437600  | 2.57316400  | -0.63570600 |
| C | 2.48333000  | 3.72806700  | -0.70396800 |
| H | 2.70214000  | 2.94361900  | 3.16686300  |
| H | 1.79584600  | 4.30545000  | 2.50238200  |
| C | 3.68925200  | 3.93497400  | 1.49519800  |
| H | 2.80262600  | 1.86628500  | -1.75856800 |
| H | 4.25810400  | 2.85083500  | -1.59874600 |
| H | 4.88191900  | 2.19075800  | 2.02517800  |
| H | 5.46286000  | 3.05238200  | 0.59883200  |
| H | 2.17648200  | 4.25054000  | -1.61638600 |
| C | 3.27357500  | 4.68083900  | 0.21240800  |
| H | 4.25949500  | 4.60682700  | 2.14812100  |
| H | 4.16370300  | 5.05233000  | -0.31051300 |
| H | 2.66241900  | 5.55566400  | 0.46923900  |
| C | 0.73476500  | -0.76685700 | 1.93502900  |
| H | 0.01604600  | -1.52943600 | 1.63185600  |
| H | 0.12831400  | 0.08849100  | 2.25043000  |
| C | 1.55039100  | -1.26591700 | 3.13145000  |
| H | 1.98448000  | -2.24617000 | 2.90808100  |
| H | 2.39138100  | -0.59593300 | 3.34740200  |
| C | 0.67646500  | -1.39015100 | 4.38628000  |
| H | -0.17826600 | -2.04332700 | 4.16491200  |
| H | 0.25324800  | -0.40607900 | 4.62803200  |
| C | 1.44339800  | -1.93480700 | 5.59269700  |
| H | 0.80036200  | -2.01062600 | 6.47483700  |
| H | 1.84580800  | -2.93274100 | 5.38593800  |
| H | 2.28732300  | -1.28455700 | 5.84901500  |

|    |             |             |             |
|----|-------------|-------------|-------------|
| Rh | -0.30335900 | 0.30758800  | -1.07265700 |
| Cl | 0.85777600  | 0.95396100  | -3.07750300 |
| H  | -0.23567200 | -1.15400300 | -1.39149600 |
| H  | -2.22606800 | 1.22601400  | -2.96645800 |
| H  | -2.14051400 | 0.94911400  | 1.95389900  |
| H  | -2.20049200 | -0.79841900 | 2.18323600  |

**TS5**

|   |             |             |             |
|---|-------------|-------------|-------------|
| C | -5.26399000 | -3.11021500 | 0.51589900  |
| C | -4.41081900 | -2.00326200 | 0.68485600  |
| C | -4.96807400 | -0.84034000 | 1.25189000  |
| C | -6.31942100 | -0.79091900 | 1.61864300  |
| C | -7.13117500 | -1.90298300 | 1.43121900  |
| C | -6.60630200 | -3.07576900 | 0.87896600  |
| H | -4.86050200 | -4.01972600 | 0.07547800  |
| H | -6.70598500 | 0.12686700  | 2.04902400  |
| H | -8.17717600 | -1.85548000 | 1.71937700  |
| H | -7.23881400 | -3.94528400 | 0.73139800  |
| C | -2.27479500 | -2.67628600 | -1.58141800 |
| C | -2.12065200 | -0.16082700 | -2.30247800 |
| C | -2.43961800 | -1.59613400 | -2.66588900 |
| H | -2.88377300 | -3.55371700 | -1.82796600 |
| H | -1.23065000 | -3.00913100 | -1.56544600 |
| H | -3.48131900 | -1.59373800 | -3.02131300 |
| H | -1.82543500 | -1.84997900 | -3.53577000 |
| C | -1.61298600 | -3.00506500 | 1.40804100  |
| H | -1.59235600 | -2.51715700 | 2.38696800  |
| H | -2.06839600 | -3.99220500 | 1.54592300  |
| H | -0.58620800 | -3.15079200 | 1.06291100  |
| C | -2.86113700 | 0.40264400  | 1.43922200  |

|    |             |             |             |
|----|-------------|-------------|-------------|
| C  | -2.27904700 | -0.17983200 | 0.15245500  |
| C  | -2.41901200 | 0.55072200  | -1.12629500 |
| C  | -2.66700800 | 2.02571800  | -1.20779600 |
| C  | -1.83646900 | 2.83248200  | -2.00548300 |
| C  | -3.74623200 | 2.62556200  | -0.54285300 |
| C  | -2.06140300 | 4.20222800  | -2.10749800 |
| H  | -0.99793100 | 2.38312200  | -2.52611200 |
| C  | -3.96702900 | 4.00069400  | -0.64743000 |
| H  | -4.42001900 | 2.01719000  | 0.04817600  |
| C  | -3.12447300 | 4.79576800  | -1.42198200 |
| H  | -1.39821000 | 4.80730000  | -2.71850900 |
| H  | -4.80700100 | 4.44626200  | -0.12242700 |
| H  | -3.29549700 | 5.86546200  | -1.49690200 |
| O  | -4.29035400 | 0.33755100  | 1.46790100  |
| Si | -2.61739200 | -2.03410000 | 0.14557400  |
| C  | 1.99622300  | -2.64567600 | -0.88644000 |
| H  | 1.36308800  | -2.23353600 | -1.67539600 |
| H  | 1.33310100  | -3.08954000 | -0.13179100 |
| C  | 2.82756800  | -1.50740500 | -0.24159300 |
| C  | 2.92758200  | -3.72886400 | -1.46057300 |
| H  | 2.31482900  | -4.51783900 | -1.91370700 |
| C  | 3.83419000  | -3.09656700 | -2.53195600 |
| H  | 3.22191700  | -2.67263600 | -3.33601600 |
| H  | 4.48042500  | -3.86318700 | -2.97818100 |
| C  | 3.77426300  | -0.90099700 | -1.30621500 |
| H  | 4.39429100  | -0.12221500 | -0.84749000 |
| H  | 3.18790000  | -0.44289700 | -2.10373200 |
| C  | 4.69158400  | -1.99175300 | -1.88905700 |
| H  | 5.33513900  | -1.53551200 | -2.65074800 |
| C  | 5.55537200  | -2.58655700 | -0.76535400 |

|   |             |             |             |
|---|-------------|-------------|-------------|
| H | 6.23217900  | -3.35196800 | -1.16567100 |
| H | 6.18194300  | -1.80425000 | -0.31758300 |
| C | 3.69460600  | -2.12595600 | 0.87814900  |
| H | 3.05427700  | -2.59766800 | 1.62760100  |
| H | 4.28133400  | -1.35111900 | 1.38594300  |
| C | 3.79174900  | -4.32251700 | -0.33499600 |
| H | 3.15256400  | -4.79050500 | 0.42528700  |
| H | 4.44702600  | -5.10763400 | -0.73264400 |
| C | 4.63633600  | -3.20398000 | 0.30099400  |
| H | 5.23926500  | -3.61520200 | 1.12020800  |
| P | 1.60105000  | -0.20533100 | 0.38383500  |
| C | 2.58423600  | 1.36555400  | 0.68489100  |
| H | 3.56763300  | 0.99918700  | 1.01177500  |
| C | 2.03117200  | 2.27105300  | 1.82208400  |
| C | 2.80366000  | 2.25745400  | -0.56941200 |
| H | 1.82480600  | 1.68394300  | 2.71712000  |
| C | 0.74636100  | 3.00545600  | 1.39652100  |
| C | 3.11962500  | 3.30925100  | 2.16624900  |
| H | 3.12528000  | 1.64902500  | -1.41514400 |
| C | 1.51665600  | 2.99932000  | -0.96525800 |
| C | 3.89350800  | 3.29247500  | -0.22354600 |
| H | 0.38116700  | 3.60653200  | 2.23933800  |
| H | -0.04174300 | 2.28781400  | 1.13978800  |
| C | 1.03519600  | 3.89885300  | 0.17925900  |
| H | 4.03101700  | 2.79684200  | 2.50122200  |
| H | 2.77694600  | 3.93394800  | 3.00106700  |
| C | 3.41793300  | 4.18655700  | 0.93792900  |
| H | 0.74135100  | 2.27441800  | -1.21720400 |
| H | 1.70885200  | 3.58991100  | -1.86937600 |
| H | 4.82909200  | 2.78548900  | 0.04786100  |

|           |             |             |             |
|-----------|-------------|-------------|-------------|
| H         | 4.10620400  | 3.90716300  | -1.10683900 |
| H         | 0.11642500  | 4.41432400  | -0.12157400 |
| C         | 2.12867800  | 4.92502500  | 0.52823800  |
| H         | 4.19951600  | 4.91468200  | 1.18731500  |
| H         | 2.32455900  | 5.56986300  | -0.33772200 |
| H         | 1.79488100  | 5.57682200  | 1.34626500  |
| C         | 1.13752800  | -0.72394800 | 2.12075700  |
| H         | 0.66830000  | -1.70525600 | 2.02637700  |
| H         | 0.32024100  | -0.03875700 | 2.37127300  |
| C         | 2.15263800  | -0.72851200 | 3.28220500  |
| H         | 2.61998600  | -1.71222800 | 3.37132400  |
| H         | 2.97286200  | -0.02622500 | 3.10214800  |
| C         | 1.48187200  | -0.38455700 | 4.61795900  |
| H         | 0.65801500  | -1.08838800 | 4.79744100  |
| H         | 1.02137500  | 0.61025300  | 4.54638600  |
| C         | 2.45759700  | -0.41550300 | 5.79541100  |
| H         | 1.95832500  | -0.16578800 | 6.73664600  |
| H         | 2.90822200  | -1.40771400 | 5.90887900  |
| H         | 3.27196200  | 0.30271300  | 5.64808500  |
| Rh        | -0.34601800 | -0.00811800 | -0.91736500 |
| Cl        | 0.89729000  | 0.11818100  | -2.97175300 |
| H         | -0.91338600 | 0.15033700  | 0.58741300  |
| H         | -2.01892400 | 0.46372500  | -3.18529100 |
| H         | -2.63480100 | 1.46385500  | 1.56104100  |
| H         | -2.45965200 | -0.14096700 | 2.30608700  |
| <b>4a</b> |             |             |             |
| C         | -5.42499900 | -3.03061400 | 0.44659600  |
| C         | -4.52043400 | -1.97062900 | 0.64806000  |
| C         | -5.03804000 | -0.77012500 | 1.17164200  |

|   |             |             |             |
|---|-------------|-------------|-------------|
| C | -6.40132600 | -0.63954500 | 1.46757500  |
| C | -7.26381900 | -1.70713000 | 1.25182800  |
| C | -6.77940000 | -2.91545900 | 0.74024500  |
| H | -5.05170700 | -3.96686500 | 0.03701800  |
| H | -6.75663900 | 0.30475300  | 1.86622200  |
| H | -8.31863800 | -1.59689200 | 1.48535000  |
| H | -7.45217000 | -3.74984100 | 0.57023000  |
| C | -2.28878700 | -2.79818600 | -1.47669400 |
| C | -2.10074300 | -0.32003200 | -2.29301300 |
| C | -2.45265100 | -1.76071700 | -2.59983200 |
| H | -2.85736300 | -3.70532500 | -1.71249900 |
| H | -1.23371500 | -3.09012000 | -1.41216300 |
| H | -3.49926300 | -1.75939900 | -2.94135500 |
| H | -1.85496700 | -2.06111600 | -3.46695600 |
| C | -1.78103200 | -3.05715700 | 1.54683200  |
| H | -1.76227900 | -2.52554200 | 2.50319800  |
| H | -2.27203700 | -4.02117800 | 1.71959200  |
| H | -0.75096400 | -3.25612900 | 1.23656000  |
| C | -2.88004000 | 0.37246100  | 1.43766700  |
| C | -2.24325000 | -0.26997000 | 0.19836900  |
| C | -2.33127000 | 0.43900800  | -1.13317200 |
| C | -2.56711700 | 1.91465000  | -1.26657400 |
| C | -1.74716100 | 2.67240300  | -2.12344300 |
| C | -3.62404800 | 2.56515500  | -0.61222300 |
| C | -1.95776600 | 4.03776400  | -2.29037300 |
| H | -0.92621000 | 2.18838900  | -2.64052200 |
| C | -3.82783900 | 3.93695200  | -0.77876800 |
| H | -4.30269400 | 2.00017800  | 0.01370400  |
| C | -2.99437200 | 4.68178700  | -1.61026000 |
| H | -1.30071500 | 4.60056200  | -2.94678900 |



|    |             |             |             |
|----|-------------|-------------|-------------|
| H  | -4.65094100 | 4.41828900  | -0.25844100 |
| H  | -3.15263400 | 5.74892900  | -1.73402300 |
| O  | -4.30753700 | 0.37066700  | 1.40805400  |
| Si | -2.71086400 | -2.10634100 | 0.21078400  |
| C  | 2.20428900  | -2.61244900 | -0.86408000 |
| H  | 1.55788800  | -2.24634600 | -1.66561700 |
| H  | 1.55650000  | -3.08806800 | -0.11442600 |
| C  | 2.95767500  | -1.42004900 | -0.22003700 |
| C  | 3.20782700  | -3.64173100 | -1.41581500 |
| H  | 2.65112400  | -4.47234700 | -1.86679400 |
| C  | 4.08406500  | -2.96389900 | -2.48481000 |
| H  | 3.45458100  | -2.58723700 | -3.29914400 |
| H  | 4.78149500  | -3.69260900 | -2.91728800 |
| C  | 3.87708800  | -0.76447800 | -1.27904300 |
| H  | 4.44672800  | 0.04906600  | -0.81563000 |
| H  | 3.27353900  | -0.34057800 | -2.08354500 |
| C  | 4.86436500  | -1.80156900 | -1.84546100 |
| H  | 5.48609500  | -1.31352200 | -2.60555700 |
| C  | 5.75200400  | -2.33064700 | -0.70720700 |
| H  | 6.47882400  | -3.05666300 | -1.09299700 |
| H  | 6.32440400  | -1.50644900 | -0.26213500 |
| C  | 3.84792100  | -1.97271700 | 0.91503000  |
| H  | 3.23045700  | -2.47970100 | 1.66006600  |
| H  | 4.37668200  | -1.15790100 | 1.42456100  |
| C  | 4.09580100  | -4.16856200 | -0.27539300 |
| H  | 3.47926700  | -4.66838000 | 0.48336300  |
| H  | 4.80266900  | -4.91518400 | -0.65865000 |
| C  | 4.86265500  | -2.99350900 | 0.35735700  |
| H  | 5.48232900  | -3.35885600 | 1.18577800  |
| P  | 1.64187300  | -0.19356800 | 0.36219800  |

|   |             |             |             |
|---|-------------|-------------|-------------|
| C | 2.52469600  | 1.41067000  | 0.77233700  |
| H | 3.49589700  | 1.08779600  | 1.17353600  |
| C | 1.82301900  | 2.25141600  | 1.87619500  |
| C | 2.80079900  | 2.34833200  | -0.43688300 |
| H | 1.57378400  | 1.62746500  | 2.73493300  |
| C | 0.53874600  | 2.91938200  | 1.35097800  |
| C | 2.81174900  | 3.34005800  | 2.34122400  |
| H | 3.23425500  | 1.78308800  | -1.26281800 |
| C | 1.51359800  | 3.02769700  | -0.93213600 |
| C | 3.79322800  | 3.43334100  | 0.03053900  |
| H | 0.05973300  | 3.47184600  | 2.16983900  |
| H | -0.17441600 | 2.16267100  | 1.00236500  |
| C | 0.87977500  | 3.86364600  | 0.18675600  |
| H | 3.71879700  | 2.87162100  | 2.74533300  |
| H | 2.35969400  | 3.92088000  | 3.15542300  |
| C | 3.16447300  | 4.26623600  | 1.16435100  |
| H | 0.80925700  | 2.26973700  | -1.27556100 |
| H | 1.75334300  | 3.65886200  | -1.79677900 |
| H | 4.72905400  | 2.97252000  | 0.37392300  |
| H | 4.04719500  | 4.08382400  | -0.81544200 |
| H | -0.03788600 | 4.33375300  | -0.18200800 |
| C | 1.87450100  | 4.94024200  | 0.65762900  |
| H | 3.87647700  | 5.03079400  | 1.49869400  |
| H | 2.10704800  | 5.62052000  | -0.17138500 |
| H | 1.43098100  | 5.54759700  | 1.45755800  |
| C | 1.10465500  | -0.79680000 | 2.05230500  |
| H | 0.70959100  | -1.80374900 | 1.89690700  |
| H | 0.23018900  | -0.17503600 | 2.27383400  |
| C | 2.04243400  | -0.77533000 | 3.27704300  |
| H | 2.56826500  | -1.72920100 | 3.36625800  |

|    |             |             |             |
|----|-------------|-------------|-------------|
| H  | 2.82311600  | -0.01533300 | 3.17079900  |
| C  | 1.26842500  | -0.52158400 | 4.57650000  |
| H  | 0.48305900  | -1.28238700 | 4.68082300  |
| H  | 0.74926200  | 0.44404600  | 4.50543500  |
| C  | 2.16860100  | -0.53088900 | 5.81303200  |
| H  | 1.59645200  | -0.34558900 | 6.72728100  |
| H  | 2.67514000  | -1.49589200 | 5.92526900  |
| H  | 2.94185400  | 0.24203000  | 5.73994900  |
| Rh | -0.27253900 | -0.09410100 | -0.98781600 |
| Cl | 0.95821600  | 0.12113800  | -3.00142500 |
| H  | -1.09854100 | -0.23595100 | 0.55623500  |
| H  | -2.02288300 | 0.27378200  | -3.19950000 |
| H  | -2.60961000 | 1.42524300  | 1.54001300  |
| H  | -2.53966300 | -0.16124100 | 2.33629500  |

**L=L1**

**Rh-L1**

|   |             |             |             |
|---|-------------|-------------|-------------|
| C | -1.20133205 | -1.00938265 | -0.32834506 |
| C | -1.03538835 | -0.52806500 | 1.10240348  |
| C | -1.17227583 | 0.95620769  | 1.39154272  |
| C | -0.37041260 | 1.94953381  | 0.55356773  |
| H | -0.06011121 | -0.87473949 | 1.38374782  |
| H | -2.19647443 | 1.28737438  | 1.28382278  |
| P | 0.70228443  | 0.75871347  | -1.26334169 |
| O | 0.91441470  | 1.54819954  | 0.21394187  |
| O | 0.02102456  | -0.78092640 | -1.06515487 |
| C | 2.34449321  | 0.62171075  | -1.98642062 |
| C | 3.29739250  | 1.60799275  | -1.70316023 |
| C | 2.66662817  | -0.45835914 | -2.80623141 |
| C | 4.58503802  | 1.51098249  | -2.23316860 |

|    |             |             |             |
|----|-------------|-------------|-------------|
| H  | 3.03516354  | 2.44002250  | -1.08082932 |
| C  | 3.95715236  | -0.56272376 | -3.33518747 |
| H  | 1.92864668  | -1.19976495 | -3.02701776 |
| C  | 4.91586672  | 0.42281747  | -3.05100719 |
| H  | 5.31287416  | 2.26591414  | -2.01719213 |
| H  | 4.20852592  | -1.39300804 | -3.95878157 |
| H  | 5.90219239  | 0.33800602  | -3.45063568 |
| O  | -0.80568832 | 0.92049666  | 2.73787045  |
| O  | -1.99738304 | -0.97618943 | 1.99840993  |
| C  | -1.54560826 | -0.25568904 | 3.18307905  |
| C  | -2.77714418 | 0.10145890  | 4.04879226  |
| H  | -3.27688768 | -0.79873014 | 4.34594759  |
| H  | -2.45942952 | 0.63496611  | 4.92249154  |
| H  | -3.45437910 | 0.71313032  | 3.48796862  |
| C  | -0.55538464 | -1.10290765 | 3.97681238  |
| H  | -0.26072256 | -0.57760202 | 4.85817470  |
| H  | -1.01667278 | -2.02564856 | 4.24762627  |
| H  | 0.30344250  | -1.29353118 | 3.36792939  |
| Rh | -0.64916853 | 1.99265522  | -2.65632082 |
| Cl | -1.96453570 | 3.19479545  | -4.01230733 |
| C  | -2.38630512 | -0.74424146 | -1.27146539 |
| C  | -2.55013712 | -1.55010222 | -2.40153891 |
| C  | -3.32243848 | 0.26388687  | -0.98641691 |
| C  | -3.64206998 | -1.34922789 | -3.25338004 |
| H  | -1.83437311 | -2.31355041 | -2.61728704 |
| C  | -4.44278366 | 0.43242841  | -1.81158255 |
| H  | -3.18925083 | 0.89526022  | -0.13128511 |
| C  | -4.59690200 | -0.36766521 | -2.95221147 |
| H  | -3.74771626 | -1.94551603 | -4.13541383 |
| H  | -5.18140076 | 1.17006367  | -1.57122430 |

|   |             |             |             |
|---|-------------|-------------|-------------|
| H | -5.44215217 | -0.22940195 | -3.59264640 |
| C | -1.01551102 | -2.51838063 | -0.17811693 |
| C | 0.21290848  | -2.74055662 | 0.45033200  |
| C | -1.87235853 | -3.58409315 | -0.46294586 |
| C | 0.58779746  | -4.03768218 | 0.80791770  |
| H | 0.86218394  | -1.91465671 | 0.66303235  |
| C | -1.49305176 | -4.88493589 | -0.11734760 |
| H | -2.81283884 | -3.40341692 | -0.94146019 |
| C | -0.26470917 | -5.11279291 | 0.51952606  |
| H | 1.52031947  | -4.20824059 | 1.30141327  |
| H | -2.14162963 | -5.70465121 | -0.33848558 |
| H | 0.02437334  | -6.10697386 | 0.78451071  |
| C | -1.05233813 | 3.18311702  | -0.02145168 |
| C | -2.40439224 | 3.58311055  | 0.07410067  |
| C | -0.15969479 | 3.99916548  | -0.75695358 |
| C | -2.87766010 | 4.73306070  | -0.57339210 |
| H | -3.08777129 | 2.98871909  | 0.64650592  |
| C | -0.63881036 | 5.18574134  | -1.37209671 |
| H | 0.87232442  | 3.73702741  | -0.83744242 |
| C | -1.99720408 | 5.53425581  | -1.29912602 |
| H | -3.91660720 | 4.99120146  | -0.52095509 |
| H | 0.03581914  | 5.82571125  | -1.90152660 |
| H | -2.35991531 | 6.41511306  | -1.79199333 |
| C | 0.42333623  | 2.39271172  | 1.76708775  |
| C | 0.24441984  | 3.56667569  | 2.48218100  |
| C | 1.42841212  | 1.47723622  | 2.13526611  |
| C | 1.11288013  | 3.82281813  | 3.56653240  |
| H | -0.52075592 | 4.25365098  | 2.21344023  |
| C | 2.26599967  | 1.71338954  | 3.21163862  |
| H | 1.54736213  | 0.56826348  | 1.57013571  |

|           |            |             |             |
|-----------|------------|-------------|-------------|
| C         | 2.11218389 | 2.89374758  | 3.93303882  |
| H         | 1.00767678 | 4.72564333  | 4.12394358  |
| H         | 3.01242762 | 0.99162518  | 3.48764284  |
| H         | 2.76466831 | 3.09552163  | 4.75487781  |
| <b>A'</b> |            |             |             |
| C         | 6.18152500 | -0.17098400 | 0.87694900  |
| C         | 5.20752200 | 0.68245100  | 0.32738300  |
| C         | 4.68537800 | 1.67290200  | 1.17634100  |
| C         | 5.11064700 | 1.81356300  | 2.49807000  |
| C         | 6.07644600 | 0.94854500  | 3.01151500  |
| C         | 6.61021700 | -0.05211000 | 2.19874400  |
| H         | 6.61177400 | -0.95269500 | 0.25759600  |
| H         | 4.68007000 | 2.60315700  | 3.10607900  |
| H         | 6.41011300 | 1.05808800  | 4.03917000  |
| H         | 7.36033100 | -0.73252100 | 2.58989100  |
| C         | 5.85483900 | -0.58217200 | -2.55067900 |
| C         | 3.76112000 | -1.33008000 | -1.67500600 |
| C         | 4.66899800 | -1.52581100 | -2.91704100 |
| H         | 6.62837700 | -1.11861400 | -1.99220700 |
| H         | 6.33180500 | -0.07610800 | -3.39360600 |
| H         | 4.94575100 | -2.56996500 | -3.10433200 |
| H         | 4.14119800 | -1.15503800 | -3.80097600 |
| C         | 4.06340300 | 1.93753300  | -2.34897900 |
| H         | 3.35533600 | 2.51769100  | -1.75994900 |
| H         | 4.94105000 | 2.56639100  | -2.54266900 |
| H         | 3.60023200 | 1.66450100  | -3.30038800 |
| C         | 2.37084100 | 2.10504500  | 1.01534200  |
| H         | 2.20387900 | 2.14602800  | 2.10166000  |
| H         | 1.71441300 | 2.82932100  | 0.52958100  |

|    |             |             |             |
|----|-------------|-------------|-------------|
| C  | 2.10961700  | 0.73517400  | 0.53630600  |
| C  | 2.00156300  | -0.51479800 | 0.71377300  |
| C  | 2.17196200  | -1.70006900 | 1.50500900  |
| C  | 2.91977900  | -1.63583600 | 2.69873300  |
| C  | 1.60768300  | -2.92058600 | 1.10621800  |
| C  | 3.07291000  | -2.77504900 | 3.48243300  |
| H  | 3.38334100  | -0.69726600 | 2.98491900  |
| C  | 1.76360800  | -4.05432100 | 1.89941200  |
| H  | 1.04959000  | -2.96083000 | 0.18033500  |
| C  | 2.49140700  | -3.98551800 | 3.08880600  |
| H  | 3.65309200  | -2.72302800 | 4.39910000  |
| H  | 1.31596200  | -4.99087300 | 1.58291000  |
| H  | 2.61356200  | -4.87129500 | 3.70494800  |
| O  | 3.70931200  | 2.54145000  | 0.71097300  |
| Si | 4.64286000  | 0.39384600  | -1.45313800 |
| Rh | 1.53726400  | -0.07279000 | -1.27841900 |
| Cl | 1.26233100  | 0.02316400  | -3.64837500 |
| H  | 4.11898100  | -1.90938700 | -0.81578200 |
| H  | 2.72641300  | -1.67405000 | -1.84406400 |
| C  | -1.97203100 | 1.19260400  | 1.35378800  |
| C  | -3.06156800 | 0.19433500  | 0.85493300  |
| C  | -2.49925100 | -1.20404000 | 0.57649600  |
| C  | -2.30864200 | -1.45344400 | -0.95372400 |
| H  | -3.51281400 | 0.60099200  | -0.05406200 |
| H  | -1.53043400 | -1.34836700 | 1.06481900  |
| P  | -0.48849500 | 0.66885800  | -0.99446300 |
| O  | -1.74918800 | -0.23453800 | -1.50579600 |
| O  | -0.75773900 | 0.93834500  | 0.59781000  |
| C  | -0.89684100 | 2.22794600  | -1.82976000 |
| C  | -2.21518100 | 2.66928400  | -2.00089000 |

|   |             |             |             |
|---|-------------|-------------|-------------|
| C | 0.16706500  | 3.06213100  | -2.19346500 |
| C | -2.46369300 | 3.94068100  | -2.50981900 |
| H | -3.04396900 | 2.03371800  | -1.71909800 |
| C | -0.08555700 | 4.33597100  | -2.70082600 |
| H | 1.18396500  | 2.69917800  | -2.09689900 |
| C | -1.39984100 | 4.77756600  | -2.85425200 |
| H | -3.48719100 | 4.28228100  | -2.62516500 |
| H | 0.74380000  | 4.97608500  | -2.98530600 |
| H | -1.59714600 | 5.77061700  | -3.24683600 |
| O | -3.45267200 | -2.08758800 | 1.13177200  |
| O | -4.08069300 | 0.00553000  | 1.81663800  |
| C | -4.27855200 | -1.39307600 | 2.07037800  |
| C | -3.84195900 | -1.72632500 | 3.49169400  |
| H | -4.40874200 | -1.12853100 | 4.20940600  |
| H | -4.01890800 | -2.78626100 | 3.69415700  |
| H | -2.78084500 | -1.51042900 | 3.62395700  |
| C | -5.72941200 | -1.74271800 | 1.77840100  |
| H | -5.89361100 | -2.81463300 | 1.91658300  |
| H | -6.38939800 | -1.19559600 | 2.45652600  |
| H | -5.96766200 | -1.47943700 | 0.74631300  |
| C | -1.59562600 | 0.90457100  | 2.80609300  |
| C | -0.51400400 | 0.07134300  | 3.10983600  |
| C | -2.36475500 | 1.42866000  | 3.85124800  |
| C | -0.21261400 | -0.24610800 | 4.43543500  |
| H | 0.10156400  | -0.31611900 | 2.31253700  |
| C | -2.06319300 | 1.11232600  | 5.17425600  |
| H | -3.20132700 | 2.07986800  | 3.62784900  |
| C | -0.98886200 | 0.27065700  | 5.47218700  |
| H | 0.63160500  | -0.89686500 | 4.64321200  |
| H | -2.66991700 | 1.52461000  | 5.97502500  |



|   |             |             |             |
|---|-------------|-------------|-------------|
| H | -0.75757800 | 0.02598100  | 6.50464200  |
| C | -2.39685000 | 2.64406900  | 1.16950500  |
| C | -1.41254200 | 3.63722400  | 1.12067200  |
| C | -3.74120200 | 3.01072500  | 1.06073200  |
| C | -1.75987600 | 4.96825300  | 0.91724400  |
| H | -0.37206700 | 3.35265400  | 1.21957100  |
| C | -4.09093600 | 4.34985700  | 0.87045300  |
| H | -4.51832800 | 2.25757700  | 1.13220600  |
| C | -3.10327700 | 5.32889200  | 0.78474800  |
| H | -0.98309600 | 5.72389500  | 0.85409900  |
| H | -5.13849700 | 4.62223600  | 0.78289800  |
| H | -3.37563400 | 6.36712600  | 0.62127600  |
| C | -1.39532400 | -2.64354700 | -1.22338600 |
| C | -1.40900100 | -3.76548300 | -0.38435500 |
| C | -0.57336500 | -2.64490800 | -2.35475400 |
| C | -0.61562500 | -4.87487600 | -0.68242000 |
| H | -2.03478700 | -3.77448000 | 0.50078600  |
| C | 0.24689000  | -3.73953500 | -2.62723600 |
| H | -0.55233300 | -1.78526000 | -3.01114700 |
| C | 0.22448500  | -4.86146400 | -1.79647100 |
| H | -0.64499200 | -5.74300900 | -0.03051000 |
| H | 0.89925100  | -3.70681900 | -3.49421600 |
| H | 0.85599000  | -5.71725000 | -2.01505100 |
| C | -3.65377000 | -1.63031700 | -1.66715200 |
| C | -4.16031600 | -0.63999200 | -2.51493500 |
| C | -4.40436200 | -2.79796200 | -1.47181200 |
| C | -5.40394700 | -0.79880300 | -3.13046600 |
| H | -3.57071400 | 0.24346200  | -2.71529600 |
| C | -5.64624400 | -2.95226200 | -2.08239500 |
| H | -4.01891900 | -3.58688900 | -0.84047000 |

|   |             |             |             |
|---|-------------|-------------|-------------|
| C | -6.15627200 | -1.94996800 | -2.91035900 |
| H | -5.77630600 | -0.01931000 | -3.78850800 |
| H | -6.21441100 | -3.86230800 | -1.91433300 |
| H | -7.12358100 | -2.07365200 | -3.38794800 |

**TS6**

|   |             |             |             |
|---|-------------|-------------|-------------|
| C | -6.10523800 | -0.19204800 | -0.68121700 |
| C | -5.09256000 | 0.69340800  | -0.27078800 |
| C | -4.66547800 | 1.64179400  | -1.21634000 |
| C | -5.21852800 | 1.71476800  | -2.49498200 |
| C | -6.22230400 | 0.82138700  | -2.86790800 |
| C | -6.66284900 | -0.14055800 | -1.95874800 |
| H | -6.46551700 | -0.94546500 | 0.01306500  |
| H | -4.85379300 | 2.47389500  | -3.17991400 |
| H | -6.65594100 | 0.87762800  | -3.86197400 |
| H | -7.44062700 | -0.84377800 | -2.24018900 |
| C | -5.52155300 | -0.36862100 | 2.68698200  |
| C | -3.57986200 | -1.33006600 | 1.66427000  |
| C | -4.42982300 | -1.44130700 | 2.94549900  |
| H | -6.41019700 | -0.79873900 | 2.21519600  |
| H | -5.84497300 | 0.18507600  | 3.57221700  |
| H | -4.80985700 | -2.45601600 | 3.11684100  |
| H | -3.81198300 | -1.16107000 | 3.80224000  |
| C | -3.87571900 | 2.19489500  | 2.20466400  |
| H | -3.28213700 | 2.79840400  | 1.52097500  |
| H | -4.81338700 | 2.73004800  | 2.40563200  |
| H | -3.33796600 | 2.05102300  | 3.14381600  |
| C | -2.33942300 | 2.04000800  | -1.21864300 |
| H | -2.20780800 | 2.01458400  | -2.31035600 |
| H | -1.64560300 | 2.76884100  | -0.79579900 |

|    |             |             |             |
|----|-------------|-------------|-------------|
| C  | -2.10268300 | 0.69321600  | -0.67352000 |
| C  | -2.00471200 | -0.56339500 | -0.77679100 |
| C  | -2.16459900 | -1.78681500 | -1.50995800 |
| C  | -2.86967200 | -1.77170300 | -2.73114300 |
| C  | -1.63288100 | -2.99409500 | -1.03429800 |
| C  | -3.01322700 | -2.94490800 | -3.46465400 |
| H  | -3.30915400 | -0.84160600 | -3.07718900 |
| C  | -1.78080900 | -4.16325600 | -1.77604400 |
| H  | -1.10490700 | -2.99859400 | -0.09043600 |
| C  | -2.46573500 | -4.14291100 | -2.99222200 |
| H  | -3.56001000 | -2.92945700 | -4.40291000 |
| H  | -1.35897600 | -5.08919000 | -1.39882100 |
| H  | -2.58073500 | -5.05606100 | -3.56841600 |
| O  | -3.65334100 | 2.53512400  | -0.89702600 |
| Si | -4.36738900 | 0.53376200  | 1.47079600  |
| Rh | -1.63026900 | -0.02501600 | 1.22068200  |
| Cl | -1.30336900 | 0.18100600  | 3.59033000  |
| H  | -4.07420500 | -1.78936200 | 0.80064400  |
| H  | -2.60469100 | -1.83615500 | 1.74499900  |
| C  | 1.97357800  | 1.14384900  | -1.39200300 |
| C  | 3.04038200  | 0.14987000  | -0.83787000 |
| C  | 2.45804800  | -1.23197900 | -0.52041700 |
| C  | 2.24045800  | -1.42309800 | 1.01426600  |
| H  | 3.47965700  | 0.58276200  | 0.06475800  |
| H  | 1.49531400  | -1.38337700 | -1.01871200 |
| P  | 0.43427900  | 0.71790800  | 0.94247800  |
| O  | 1.67616700  | -0.18387500 | 1.50927800  |
| O  | 0.74116400  | 0.93083900  | -0.65373100 |
| C  | 0.86270700  | 2.29845600  | 1.72727400  |
| C  | 2.18594100  | 2.71783600  | 1.91457800  |

|   |             |             |             |
|---|-------------|-------------|-------------|
| C | -0.18974500 | 3.17037600  | 2.02735400  |
| C | 2.45027100  | 4.00352200  | 2.37769900  |
| H | 3.00680600  | 2.05313000  | 1.68125600  |
| C | 0.07802400  | 4.45825100  | 2.48937900  |
| H | -1.21088400 | 2.82742700  | 1.91515200  |
| C | 1.39754800  | 4.87699900  | 2.66008000  |
| H | 3.47805800  | 4.32746800  | 2.50546700  |
| H | -0.74381300 | 5.12754500  | 2.72444600  |
| H | 1.60759700  | 5.88085200  | 3.01701200  |
| O | 3.41022200  | -2.14438000 | -1.03010000 |
| O | 4.07496100  | -0.08333300 | -1.77344900 |
| C | 4.25947400  | -1.49138900 | -1.97772000 |
| C | 3.84208100  | -1.86766900 | -3.39413700 |
| H | 4.42786400  | -1.30128700 | -4.12198100 |
| H | 4.00962900  | -2.93586000 | -3.55755500 |
| H | 2.78604500  | -1.64440900 | -3.55170100 |
| C | 5.70142000  | -1.84793400 | -1.65162400 |
| H | 5.85448000  | -2.92583900 | -1.75058800 |
| H | 6.37792900  | -1.33238800 | -2.33815900 |
| H | 5.92786000  | -1.55186400 | -0.62585400 |
| C | 1.62444500  | 0.81082100  | -2.84181800 |
| C | 0.54388000  | -0.02602400 | -3.13999200 |
| C | 2.41812600  | 1.29457300  | -3.88803500 |
| C | 0.26774900  | -0.38607000 | -4.46020400 |
| H | -0.09016800 | -0.38267500 | -2.34282400 |
| C | 2.14159600  | 0.93588400  | -5.20573600 |
| H | 3.25439200  | 1.94776400  | -3.66943600 |
| C | 1.06817600  | 0.09104100  | -5.49757700 |
| H | -0.57533300 | -1.03970000 | -4.66366500 |
| H | 2.76738300  | 1.31741100  | -6.00708500 |

|   |             |             |             |
|---|-------------|-------------|-------------|
| H | 0.85654900  | -0.18704300 | -6.52578100 |
| C | 2.41737700  | 2.59464600  | -1.24905400 |
| C | 1.44872900  | 3.60404500  | -1.25319100 |
| C | 3.76522400  | 2.94467600  | -1.12828500 |
| C | 1.81331900  | 4.93597700  | -1.08970200 |
| H | 0.40592600  | 3.33255700  | -1.36254200 |
| C | 4.13280100  | 4.28409600  | -0.97842200 |
| H | 4.53163800  | 2.17801100  | -1.15923100 |
| C | 3.15960400  | 5.28059500  | -0.94506900 |
| H | 1.04744500  | 5.70491900  | -1.06710800 |
| H | 5.18287100  | 4.54320000  | -0.88107400 |
| H | 3.44544000  | 6.31964400  | -0.81271600 |
| C | 1.32307100  | -2.60255800 | 1.31631200  |
| C | 1.35162800  | -3.75852400 | 0.52510900  |
| C | 0.48877100  | -2.56142600 | 2.43779000  |
| C | 0.56059200  | -4.85884000 | 0.86057600  |
| H | 1.98756100  | -3.80112200 | -0.35168900 |
| C | -0.32864900 | -3.64833900 | 2.74708900  |
| H | 0.45560200  | -1.67436800 | 3.05620800  |
| C | -0.29157900 | -4.80396400 | 1.96421800  |
| H | 0.60142300  | -5.75311200 | 0.24568000  |
| H | -0.98976000 | -3.58400100 | 3.60576200  |
| H | -0.92034600 | -5.65377400 | 2.21213800  |
| C | 3.57114600  | -1.57841700 | 1.76081900  |
| C | 4.04877400  | -0.57191000 | 2.60634000  |
| C | 4.33244100  | -2.74557500 | 1.60705900  |
| C | 5.27562900  | -0.71350800 | 3.25863700  |
| H | 3.44903800  | 0.31100400  | 2.77589700  |
| C | 5.55785500  | -2.88256100 | 2.25413700  |
| H | 3.96854400  | -3.54766400 | 0.97975700  |

|   |            |             |            |
|---|------------|-------------|------------|
| C | 6.03987200 | -1.86374200 | 3.07866600 |
| H | 5.62526000 | 0.07886500  | 3.91377100 |
| H | 6.13482000 | -3.79235700 | 2.11749700 |
| H | 6.99423500 | -1.97407700 | 3.58474300 |

**B'**

|   |            |             |             |
|---|------------|-------------|-------------|
| C | 6.17227200 | -0.01675400 | 0.35291700  |
| C | 5.01698300 | 0.76547200  | 0.19108100  |
| C | 4.64318900 | 1.56769300  | 1.28030900  |
| C | 5.37691100 | 1.61781600  | 2.46288600  |
| C | 6.52671100 | 0.83639900  | 2.58645000  |
| C | 6.92035500 | 0.01245400  | 1.53176900  |
| H | 6.49685200 | -0.66265800 | -0.45684200 |
| H | 5.04189900 | 2.26594800  | 3.26679400  |
| H | 7.10828400 | 0.87014300  | 3.50297800  |
| H | 7.81051800 | -0.60259100 | 1.62396400  |
| C | 4.89721000 | -0.26545400 | -2.71883100 |
| C | 3.38196600 | -1.75045700 | -1.37614100 |
| C | 4.21605900 | -1.64826100 | -2.65235800 |
| H | 5.97264400 | -0.31336300 | -2.51436200 |
| H | 4.78304100 | 0.19362700  | -3.70480000 |
| H | 4.95222100 | -2.46483800 | -2.68477900 |
| H | 3.56187300 | -1.77012700 | -3.51800600 |
| C | 3.90091800 | 2.58633200  | -1.97791800 |
| H | 3.55476500 | 3.25095700  | -1.18512900 |
| H | 4.92195900 | 2.88768200  | -2.24705800 |
| H | 3.26788600 | 2.68267800  | -2.86222900 |
| C | 2.30458400 | 1.62846300  | 1.55658900  |
| H | 2.27506200 | 1.48969200  | 2.64752900  |
| H | 1.47191700 | 2.26892200  | 1.26398500  |

|    |             |             |             |
|----|-------------|-------------|-------------|
| C  | 2.18164400  | 0.30483200  | 0.92189600  |
| C  | 2.02718400  | -0.94261500 | 0.93059700  |
| C  | 1.97471700  | -2.21114200 | 1.60165900  |
| C  | 2.50701500  | -2.32018400 | 2.90221100  |
| C  | 1.36561500  | -3.32708600 | 1.01186400  |
| C  | 2.41235300  | -3.52242100 | 3.59586600  |
| H  | 2.99320700  | -1.45839200 | 3.34799400  |
| C  | 1.27558800  | -4.52695100 | 1.71237300  |
| H  | 0.96077500  | -3.24153900 | 0.01371300  |
| C  | 1.79445200  | -4.62900700 | 3.00392200  |
| H  | 2.82637600  | -3.60065700 | 4.59674200  |
| H  | 0.79664000  | -5.38085400 | 1.24457800  |
| H  | 1.72322000  | -5.56598800 | 3.54784000  |
| O  | 3.48974200  | 2.33882700  | 1.18068400  |
| Si | 4.00783200  | 0.78722400  | -1.41757800 |
| Rh | 1.87582400  | -0.26458200 | -1.09519300 |
| Cl | 1.62607600  | 0.22453500  | -3.42751600 |
| H  | 4.01763500  | -1.84332200 | -0.48996600 |
| H  | 2.70379100  | -2.61221300 | -1.39340600 |
| C  | -1.96022200 | 1.15059400  | 1.41456400  |
| C  | -3.04611900 | 0.25636100  | 0.73822500  |
| C  | -2.52404400 | -1.13274800 | 0.35775400  |
| C  | -2.23160900 | -1.23383300 | -1.17399200 |
| H  | -3.40791900 | 0.77225400  | -0.15514500 |
| H  | -1.59966800 | -1.37158600 | 0.89317800  |
| P  | -0.31346700 | 0.78492400  | -0.86390700 |
| O  | -1.58487700 | 0.00195500  | -1.55668000 |
| O  | -0.70005400 | 0.90674500  | 0.73125100  |
| C  | -0.62504500 | 2.43864300  | -1.54702100 |
| C  | -1.90207600 | 2.94187500  | -1.82544300 |

|   |             |             |             |
|---|-------------|-------------|-------------|
| C | 0.49023700  | 3.27385300  | -1.65970600 |
| C | -2.05591500 | 4.27350000  | -2.19989900 |
| H | -2.77133600 | 2.30480500  | -1.72945900 |
| C | 0.33458700  | 4.60727800  | -2.03540700 |
| H | 1.47449600  | 2.87206500  | -1.46078200 |
| C | -0.93941600 | 5.10789900  | -2.30246200 |
| H | -3.04845300 | 4.66470100  | -2.39918600 |
| H | 1.20717800  | 5.24690000  | -2.12534700 |
| H | -1.06566000 | 6.14685500  | -2.59211300 |
| O | -3.54933400 | -2.02092400 | 0.75596600  |
| O | -4.14350900 | 0.02301700  | 1.59964800  |
| C | -4.41679200 | -1.38151900 | 1.69697600  |
| C | -4.10522000 | -1.87271600 | 3.10535200  |
| H | -4.69978300 | -1.32004400 | 3.83659700  |
| H | -4.34192600 | -2.93720400 | 3.18698500  |
| H | -3.04926500 | -1.72399200 | 3.33487800  |
| C | -5.85414600 | -1.63109500 | 1.26757300  |
| H | -6.07180500 | -2.70231200 | 1.28391900  |
| H | -6.54105200 | -1.12245200 | 1.94889000  |
| H | -6.00232700 | -1.25608500 | 0.25340200  |
| C | -1.71463400 | 0.70721900  | 2.85563900  |
| C | -0.70556700 | -0.21499900 | 3.15547500  |
| C | -2.53767200 | 1.17269900  | 3.88727200  |
| C | -0.53144200 | -0.67635400 | 4.46157200  |
| H | -0.04813000 | -0.56109300 | 2.37182500  |
| C | -2.36167300 | 0.71377700  | 5.19106300  |
| H | -3.31891800 | 1.89040200  | 3.66724800  |
| C | -1.36125500 | -0.21600900 | 5.48332400  |
| H | 0.25423400  | -1.39729900 | 4.66664600  |
| H | -3.00931300 | 1.08284000  | 5.98078700  |



|   |             |             |             |
|---|-------------|-------------|-------------|
| H | -1.22846100 | -0.57336500 | 6.50016000  |
| C | -2.32286800 | 2.62933900  | 1.33861700  |
| C | -1.31295700 | 3.58855100  | 1.46780800  |
| C | -3.64273200 | 3.05427700  | 1.15758000  |
| C | -1.60467800 | 4.94454800  | 1.36757900  |
| H | -0.29240700 | 3.26402700  | 1.62797100  |
| C | -3.93866800 | 4.41671400  | 1.07239100  |
| H | -4.44496400 | 2.32760000  | 1.09326100  |
| C | -2.92132500 | 5.36417800  | 1.16294600  |
| H | -0.80389400 | 5.67355700  | 1.44149800  |
| H | -4.96760300 | 4.73251500  | 0.92810400  |
| H | -3.15021300 | 6.42230400  | 1.08042300  |
| C | -1.35580000 | -2.43849100 | -1.50030300 |
| C | -1.52132600 | -3.65563700 | -0.82417600 |
| C | -0.42590900 | -2.35694500 | -2.54123900 |
| C | -0.77669800 | -4.77362700 | -1.20133600 |
| H | -2.22717600 | -3.72995000 | -0.00494000 |
| C | 0.34985500  | -3.46525300 | -2.88439700 |
| H | -0.29634600 | -1.42848500 | -3.07999100 |
| C | 0.17091000  | -4.68066400 | -2.22297600 |
| H | -0.92576000 | -5.71469500 | -0.68016000 |
| H | 1.08897400  | -3.36675100 | -3.67303500 |
| H | 0.76458000  | -5.54697500 | -2.49822100 |
| C | -3.52369500 | -1.27669800 | -2.00162400 |
| C | -3.88925800 | -0.20504400 | -2.82296100 |
| C | -4.35865700 | -2.40201900 | -1.95510000 |
| C | -5.07795600 | -0.24170500 | -3.55511700 |
| H | -3.23086900 | 0.64730000  | -2.91036900 |
| C | -5.54619800 | -2.43462800 | -2.68183800 |
| H | -4.08364900 | -3.25396100 | -1.34921100 |

|   |             |             |             |
|---|-------------|-------------|-------------|
| C | -5.91639800 | -1.35119600 | -3.48108800 |
| H | -5.33942600 | 0.60055300  | -4.18878000 |
| H | -6.18115600 | -3.31387800 | -2.62686800 |
| H | -6.84138700 | -1.38006600 | -4.04908700 |

**TS7**

|   |             |             |             |
|---|-------------|-------------|-------------|
| C | -6.09708900 | 0.40322700  | 1.20635900  |
| C | -4.77452200 | 0.71132400  | 0.80652400  |
| C | -4.62750900 | 1.93277600  | 0.12294000  |
| C | -5.72038500 | 2.75189200  | -0.19183300 |
| C | -7.00013400 | 2.39687000  | 0.20686000  |
| C | -7.19013000 | 1.21682600  | 0.92945000  |
| H | -6.27938900 | -0.51569700 | 1.75370500  |
| H | -5.52665700 | 3.67109600  | -0.73487100 |
| H | -7.84095700 | 3.04039800  | -0.03421600 |
| H | -8.18083200 | 0.92717700  | 1.26534500  |
| C | -4.57150400 | -2.26469100 | 1.08056400  |
| C | -2.64609600 | -2.86460100 | -0.35081100 |
| C | -3.65212100 | -3.40883000 | 0.65096900  |
| H | -5.29470000 | -2.05038600 | 0.28483500  |
| H | -5.15050700 | -2.50428400 | 1.98121100  |
| H | -4.23801300 | -4.22686700 | 0.20362500  |
| H | -3.12805400 | -3.82001600 | 1.51508300  |
| C | -3.14449800 | -0.32462300 | 3.14673900  |
| H | -2.51142500 | 0.55602700  | 3.27805200  |
| H | -4.08783200 | -0.14285300 | 3.67617300  |
| H | -2.62577500 | -1.17878200 | 3.58615600  |
| C | -2.27440500 | 1.83084700  | 0.24636800  |
| C | -2.12989400 | 0.44607800  | -0.27945400 |
| C | -1.94439000 | -0.26757900 | -1.32145200 |

|    |             |             |             |
|----|-------------|-------------|-------------|
| C  | -2.17869300 | -0.46832200 | -2.71969200 |
| C  | -2.99794900 | 0.45455800  | -3.40395100 |
| C  | -1.60702200 | -1.53745700 | -3.42868700 |
| C  | -3.21422900 | 0.31401800  | -4.77054900 |
| H  | -3.43846900 | 1.27451600  | -2.84690000 |
| C  | -1.82796200 | -1.66929200 | -4.79662000 |
| H  | -1.00827700 | -2.25754000 | -2.88788300 |
| C  | -2.62716400 | -0.74409100 | -5.47237700 |
| H  | -3.84466400 | 1.02851600  | -5.29149400 |
| H  | -1.38064000 | -2.49823300 | -5.33700700 |
| H  | -2.79968900 | -0.85057800 | -6.53901700 |
| O  | -3.42572300 | 2.44638400  | -0.29899200 |
| Si | -3.53550100 | -0.67515700 | 1.33358100  |
| Rh | -1.40507500 | -1.34524100 | 0.43230900  |
| Cl | -0.84870100 | -2.83891900 | 2.23278000  |
| H  | -1.87743000 | -3.59582000 | -0.62932700 |
| H  | -3.15873200 | -2.52607300 | -1.25593800 |
| H  | -2.32292200 | 1.84255200  | 1.34117600  |
| H  | -1.42606800 | 2.43028800  | -0.07180600 |
| C  | 1.66335200  | 2.09613400  | -0.16008700 |
| C  | 2.66841300  | 1.06801700  | -0.75350300 |
| C  | 2.15099300  | -0.32062500 | -1.16662000 |
| C  | 2.42192600  | -1.41215500 | -0.09457000 |
| H  | 3.46725900  | 0.94489700  | -0.01719000 |
| H  | 1.06695900  | -0.31035300 | -1.33226000 |
| P  | 0.49972600  | -0.08145600 | 1.32117000  |
| O  | 1.94860200  | -0.85413600 | 1.16318400  |
| O  | 0.77967200  | 1.47152600  | 0.80787500  |
| C  | 0.58222500  | 0.22586000  | 3.11330400  |
| C  | 1.11225400  | -0.73377200 | 3.98379000  |

|   |             |             |             |
|---|-------------|-------------|-------------|
| C | 0.02665700  | 1.40524600  | 3.63015800  |
| C | 1.09702300  | -0.50474300 | 5.35910300  |
| H | 1.52535800  | -1.65005200 | 3.58301300  |
| C | 0.01266300  | 1.62730800  | 5.00613500  |
| H | -0.36801600 | 2.15673300  | 2.95447100  |
| C | 0.54601400  | 0.67070600  | 5.87196200  |
| H | 1.51204100  | -1.24949500 | 6.03131800  |
| H | -0.41190700 | 2.54562300  | 5.40015100  |
| H | 0.53232800  | 0.84163700  | 6.94420800  |
| O | 2.80224700  | -0.58851700 | -2.39707800 |
| O | 3.19024000  | 1.61066100  | -1.95671500 |
| C | 3.62613800  | 0.53564700  | -2.77578100 |
| C | 3.33205400  | 0.88194500  | -4.22586200 |
| H | 3.90500600  | 1.76392100  | -4.52257500 |
| H | 3.61232000  | 0.04673900  | -4.87239500 |
| H | 2.26894900  | 1.09267300  | -4.35082200 |
| C | 5.10063700  | 0.23519400  | -2.52612000 |
| H | 5.39939000  | -0.66896600 | -3.06091600 |
| H | 5.70523700  | 1.07460200  | -2.88037300 |
| H | 5.29671500  | 0.08559700  | -1.46439900 |
| C | 0.74081100  | 2.76328000  | -1.18416200 |
| C | 0.19939100  | 4.01942600  | -0.87313000 |
| C | 0.31367600  | 2.12979300  | -2.35663100 |
| C | -0.74126400 | 4.62410500  | -1.70577600 |
| H | 0.51165400  | 4.52140500  | 0.03533500  |
| C | -0.61783200 | 2.73816800  | -3.19757400 |
| H | 0.69715200  | 1.16038000  | -2.63718600 |
| C | -1.15379800 | 3.98382100  | -2.87375400 |
| H | -1.15336400 | 5.59159500  | -1.43641900 |
| H | -0.93387300 | 2.22396600  | -4.09819500 |

|   |             |             |             |
|---|-------------|-------------|-------------|
| H | -1.88735400 | 4.44960700  | -3.52452900 |
| C | 2.52692600  | 3.12404100  | 0.57891400  |
| C | 2.66311000  | 3.09597900  | 1.96785500  |
| C | 3.27240100  | 4.05140400  | -0.16260300 |
| C | 3.51986000  | 3.99262700  | 2.61063200  |
| H | 2.09737300  | 2.38059100  | 2.54810100  |
| C | 4.12786800  | 4.94251700  | 0.48098500  |
| H | 3.18206700  | 4.06628100  | -1.24225500 |
| C | 4.25359000  | 4.91885000  | 1.87193500  |
| H | 3.60809900  | 3.96234000  | 3.69268700  |
| H | 4.69676900  | 5.65762700  | -0.10582200 |
| H | 4.91806300  | 5.61670000  | 2.37261100  |
| C | 1.70857500  | -2.72052000 | -0.41071100 |
| C | 1.14804100  | -2.98425200 | -1.66515600 |
| C | 1.69829800  | -3.72457700 | 0.56326900  |
| C | 0.57066400  | -4.22863600 | -1.93113000 |
| H | 1.19660100  | -2.24209600 | -2.45164800 |
| C | 1.11419900  | -4.95839200 | 0.30224100  |
| H | 2.13222800  | -3.52262700 | 1.53506900  |
| C | 0.54566100  | -5.21491400 | -0.94741700 |
| H | 0.14383400  | -4.42410200 | -2.91048500 |
| H | 1.08887200  | -5.71508600 | 1.07914900  |
| H | 0.08959000  | -6.17866300 | -1.15194000 |
| C | 3.91180800  | -1.66592100 | 0.10632100  |
| C | 4.63210100  | -1.01522500 | 1.11421700  |
| C | 4.58468400  | -2.54079200 | -0.75567900 |
| C | 6.00707500  | -1.22201400 | 1.24351300  |
| H | 4.11289800  | -0.35934600 | 1.80222600  |
| C | 5.95532000  | -2.74804700 | -0.62281200 |
| H | 4.03130000  | -3.05306400 | -1.53342000 |

|           |             |             |             |
|-----------|-------------|-------------|-------------|
| C         | 6.67346100  | -2.08504600 | 0.37428800  |
| H         | 6.55328100  | -0.70969800 | 2.02976000  |
| H         | 6.46342300  | -3.42815900 | -1.29982600 |
| H         | 7.74222300  | -2.24666400 | 0.47729200  |
| <b>C'</b> |             |             |             |
| C         | -6.71172000 | 0.04900800  | 0.68133900  |
| C         | -5.31970900 | 0.24492300  | 0.74486400  |
| C         | -4.85325900 | 1.57612200  | 0.69235800  |
| C         | -5.74607600 | 2.64964800  | 0.56828200  |
| C         | -7.11459300 | 2.41407100  | 0.50526000  |
| C         | -7.60828600 | 1.10755100  | 0.56525900  |
| H         | -7.09819200 | -0.96722300 | 0.71300500  |
| H         | -5.34212100 | 3.65597100  | 0.52795200  |
| H         | -7.79795200 | 3.25324600  | 0.41259800  |
| H         | -8.67638200 | 0.92030500  | 0.51755800  |
| C         | -4.47898800 | -2.58835100 | -0.39467100 |
| C         | -2.02306200 | -3.07393600 | -0.96264500 |
| C         | -3.32467600 | -3.61725600 | -0.39046900 |
| H         | -4.62420700 | -2.18355400 | -1.40476900 |
| H         | -5.42281400 | -3.07346400 | -0.11406800 |
| H         | -3.63303300 | -4.49496400 | -0.98036000 |
| H         | -3.14504100 | -3.98119300 | 0.62667400  |
| C         | -3.90261600 | -1.85020000 | 2.55600200  |
| H         | -3.76032800 | -1.03560200 | 3.27231800  |
| H         | -4.79303800 | -2.41084700 | 2.86260900  |
| H         | -3.02975400 | -2.50845700 | 2.60629400  |
| C         | -2.52183300 | 1.01827400  | 1.12955300  |
| C         | -2.55785700 | -0.25910000 | 0.30726700  |
| C         | -1.94495200 | -0.37835900 | -0.95100700 |

|    |             |             |             |
|----|-------------|-------------|-------------|
| C  | -2.25139900 | -0.00593900 | -2.29563300 |
| C  | -3.38337200 | 0.78533700  | -2.58101800 |
| C  | -1.42706700 | -0.44727200 | -3.35101400 |
| C  | -3.68364600 | 1.11794400  | -3.89755500 |
| H  | -4.00515200 | 1.13132000  | -1.76448300 |
| C  | -1.73149900 | -0.11104500 | -4.66275100 |
| H  | -0.56697300 | -1.05973500 | -3.10716500 |
| C  | -2.86089800 | 0.67110100  | -4.93543700 |
| H  | -4.55643300 | 1.72442400  | -4.11774400 |
| H  | -1.09920300 | -0.45449600 | -5.47557600 |
| H  | -3.09975400 | 0.93178800  | -5.96242700 |
| O  | -3.53036100 | 1.94652400  | 0.70231700  |
| Si | -4.11045100 | -1.19646800 | 0.80698400  |
| Rh | -0.94712400 | -1.57487500 | 0.10820700  |
| Cl | -0.53934000 | -3.33553500 | 1.79546700  |
| H  | -1.23919500 | -3.83559500 | -0.93314600 |
| H  | -2.16957900 | -2.75794300 | -2.00096100 |
| H  | -2.67158800 | 0.78390900  | 2.19079400  |
| H  | -1.58327100 | 1.55344000  | 1.01280000  |
| C  | 1.47924300  | 2.15351400  | 0.21407300  |
| C  | 2.69500900  | 1.41641000  | -0.40085000 |
| C  | 2.39470900  | 0.10136500  | -1.14416500 |
| C  | 2.70262500  | -1.18299700 | -0.32086700 |
| H  | 3.40135700  | 1.23772500  | 0.41673500  |
| H  | 1.33159800  | 0.04814200  | -1.40179600 |
| P  | 0.69028200  | -0.35549700 | 1.31472200  |
| O  | 2.20537400  | -0.94030900 | 1.02019600  |
| O  | 0.85921300  | 1.29261300  | 1.19922000  |
| C  | 0.73892500  | -0.41267500 | 3.13139100  |
| C  | 1.37541800  | -1.46900900 | 3.79404400  |

|   |             |             |             |
|---|-------------|-------------|-------------|
| C | 0.07333500  | 0.57522900  | 3.87064800  |
| C | 1.35831600  | -1.52341200 | 5.18675700  |
| H | 1.87247200  | -2.24034900 | 3.22095100  |
| C | 0.05498600  | 0.51104400  | 5.26325200  |
| H | -0.40673800 | 1.40243500  | 3.36010500  |
| C | 0.69698500  | -0.53874200 | 5.92233500  |
| H | 1.85531900  | -2.34267600 | 5.69713500  |
| H | -0.45566300 | 1.28266900  | 5.83154400  |
| H | 0.68124300  | -0.58932600 | 7.00699400  |
| O | 3.14699300  | 0.18964900  | -2.34636200 |
| O | 3.27643400  | 2.24863200  | -1.39328700 |
| C | 3.91368400  | 1.41446300  | -2.34991700 |
| C | 3.78866500  | 2.05649300  | -3.72215500 |
| H | 4.32082100  | 3.01068900  | -3.73481600 |
| H | 4.22611900  | 1.40101700  | -4.47913800 |
| H | 2.74063700  | 2.23549200  | -3.96612800 |
| C | 5.36804000  | 1.16449100  | -1.96173300 |
| H | 5.82007600  | 0.43284500  | -2.63413200 |
| H | 5.92300100  | 2.10406500  | -2.03080500 |
| H | 5.44829300  | 0.78630600  | -0.94329800 |
| C | 0.40215100  | 2.62945100  | -0.76559100 |
| C | -0.63683500 | 3.40432500  | -0.22784500 |
| C | 0.38922500  | 2.36671100  | -2.13848200 |
| C | -1.66602200 | 3.88803000  | -1.02923800 |
| H | -0.62571200 | 3.63718900  | 0.83168200  |
| C | -0.62953100 | 2.87141600  | -2.94892400 |
| H | 1.16916200  | 1.78030200  | -2.59800800 |
| C | -1.66083200 | 3.62863000  | -2.40050300 |
| H | -2.46889800 | 4.46283000  | -0.58085700 |
| H | -0.62271200 | 2.64858200  | -4.01056500 |



|   |             |             |             |
|---|-------------|-------------|-------------|
| H | -2.45746000 | 4.00627400  | -3.03337700 |
| C | 2.04096100  | 3.34341300  | 1.00233700  |
| C | 2.30014800  | 3.23742300  | 2.37162800  |
| C | 2.36503500  | 4.52926900  | 0.33252300  |
| C | 2.86423300  | 4.31042400  | 3.06450000  |
| H | 2.04777200  | 2.32322100  | 2.89429800  |
| C | 2.93348800  | 5.59555100  | 1.02552900  |
| H | 2.17332900  | 4.61033000  | -0.73080500 |
| C | 3.18245000  | 5.49155200  | 2.39568200  |
| H | 3.05141400  | 4.21906800  | 4.13042400  |
| H | 3.17897200  | 6.51057200  | 0.49464800  |
| H | 3.61937300  | 6.32594000  | 2.93627000  |
| C | 2.03604300  | -2.41029400 | -0.93857200 |
| C | 1.58811100  | -2.42552000 | -2.26791000 |
| C | 1.98023200  | -3.59220100 | -0.19166000 |
| C | 1.08608600  | -3.59989900 | -2.83067900 |
| H | 1.67706100  | -1.53761300 | -2.88239300 |
| C | 1.46990500  | -4.75981600 | -0.74991200 |
| H | 2.31564300  | -3.58476200 | 0.83746000  |
| C | 1.02282800  | -4.76840200 | -2.07244100 |
| H | 0.74565700  | -3.59801600 | -3.86179800 |
| H | 1.40356000  | -5.65622800 | -0.14321600 |
| H | 0.62424600  | -5.67974500 | -2.50740100 |
| C | 4.19862800  | -1.42439600 | -0.15765600 |
| C | 4.87639800  | -1.00628800 | 0.99269700  |
| C | 4.91895700  | -2.04381400 | -1.18621900 |
| C | 6.25665400  | -1.18808300 | 1.10240200  |
| H | 4.31947400  | -0.55235100 | 1.80274400  |
| C | 6.29500300  | -2.22568900 | -1.07371200 |
| H | 4.39911300  | -2.37802300 | -2.07600200 |

|   |            |             |             |
|---|------------|-------------|-------------|
| C | 6.97084700 | -1.79325200 | 0.06905700  |
| H | 6.76991000 | -0.85910400 | 2.00098900  |
| H | 6.84048900 | -2.70695500 | -1.87996300 |
| H | 8.04373800 | -1.93570200 | 0.15625200  |

**TS8**

|    |              |             |             |
|----|--------------|-------------|-------------|
| C  | -9.09010600  | 0.91816700  | 0.69320100  |
| C  | -7.86892000  | 0.39831200  | 1.11381000  |
| C  | -6.79526300  | 0.19072400  | 0.22855200  |
| C  | -7.00988700  | 0.51393100  | -1.12504900 |
| C  | -8.22982700  | 1.04580900  | -1.56252200 |
| C  | -9.26229400  | 1.25056800  | -0.65407100 |
| H  | -9.89771900  | 1.06770100  | 1.40322800  |
| H  | -7.73622900  | 0.15517100  | 2.16633100  |
| H  | -8.34410600  | 1.28235600  | -2.61532600 |
| H  | -10.20717800 | 1.66042800  | -0.99948900 |
| O  | -6.05359200  | 0.36747100  | -2.10092500 |
| C  | -5.10571400  | -0.70587100 | -1.94884400 |
| H  | -5.67079000  | -1.64595400 | -1.85061600 |
| H  | -4.56304000  | -0.71983500 | -2.89632300 |
| C  | -4.18593900  | -0.51650100 | -0.76311900 |
| C  | -2.87654700  | -0.24273400 | -0.92347300 |
| C  | -2.41515700  | 1.59163100  | -0.13979900 |
| C  | -4.31076200  | 1.15604500  | 1.70601700  |
| C  | -3.69265000  | 2.04326400  | 0.60772400  |
| H  | -5.09655300  | 1.72819900  | 2.21440600  |
| H  | -3.57281400  | 0.86418900  | 2.45217700  |
| H  | -3.45671400  | 3.02558000  | 1.03805500  |
| Si | -5.09851000  | -0.33748300 | 0.85884500  |
| C  | -5.26185900  | -1.90054400 | 1.89213900  |

|    |             |             |             |
|----|-------------|-------------|-------------|
| H  | -4.27361300 | -2.24964400 | 2.19776100  |
| H  | -5.85872000 | -1.71076600 | 2.79132900  |
| H  | -5.76217900 | -2.68785400 | 1.31915800  |
| C  | -2.00552000 | -0.50791600 | -2.07263700 |
| C  | -0.89954000 | 0.33983300  | -2.36519300 |
| C  | -2.06340100 | -1.76919700 | -2.73445000 |
| C  | 0.11514300  | -0.09148900 | -3.24992900 |
| H  | -0.88445500 | 1.37460400  | -2.06265300 |
| C  | -1.08279300 | -2.15358300 | -3.62303800 |
| H  | -2.89141900 | -2.42940900 | -2.50363400 |
| C  | 0.03216000  | -1.32310200 | -3.86828600 |
| H  | 0.93979100  | 0.57771500  | -3.46069000 |
| H  | -1.15990400 | -3.11262200 | -4.12719300 |
| H  | 0.80667200  | -1.64575300 | -4.55577700 |
| H  | -4.46553400 | 2.22170500  | -0.15061200 |
| Rh | -1.17488900 | -0.11145200 | 0.09802600  |
| Cl | -1.84604600 | -0.95667300 | 2.17284600  |
| C  | 2.96077300  | 1.53824400  | -0.53443200 |
| C  | 3.49692700  | 0.07097600  | -0.63121600 |
| C  | 2.45186900  | -1.06060100 | -0.69858400 |
| C  | 2.19682600  | -1.73898100 | 0.68259200  |
| H  | 4.14535000  | -0.07415800 | 0.23793300  |
| H  | 1.50150800  | -0.67255400 | -1.07879200 |
| P  | 0.90416500  | 0.53328800  | 1.16579700  |
| O  | 1.95469600  | -0.66177400 | 1.62958700  |
| O  | 1.97632400  | 1.62033200  | 0.50471800  |
| C  | 0.77555600  | 1.44739800  | 2.73315100  |
| C  | -0.46220700 | 1.90468700  | 3.19697400  |
| C  | 1.94688700  | 1.76835100  | 3.43690700  |
| C  | -0.52951700 | 2.66799400  | 4.36399800  |

|   |             |             |             |
|---|-------------|-------------|-------------|
| H | -1.36670700 | 1.64852300  | 2.66159600  |
| C | 1.87327000  | 2.52042000  | 4.60520500  |
| H | 2.90851600  | 1.44334900  | 3.05601200  |
| C | 0.63371900  | 2.97118300  | 5.07002500  |
| H | -1.49301700 | 3.01769700  | 4.72176800  |
| H | 2.78066300  | 2.76208300  | 5.15053000  |
| H | 0.57865600  | 3.56134800  | 5.98010400  |
| O | 2.96510900  | -1.98596400 | -1.64020800 |
| O | 4.24157600  | -0.10797400 | -1.82701300 |
| C | 4.15231000  | -1.46565700 | -2.25009800 |
| C | 3.97340100  | -1.47758000 | -3.76051100 |
| H | 3.83020800  | -2.50265900 | -4.11117700 |
| H | 3.10001500  | -0.87912100 | -4.02513500 |
| H | 4.85513200  | -1.05806600 | -4.25206100 |
| C | 5.37713000  | -2.24272000 | -1.78058400 |
| H | 5.26131300  | -3.30497800 | -2.00781900 |
| H | 6.26919500  | -1.86612200 | -2.28889300 |
| H | 5.50961800  | -2.13510900 | -0.70348800 |
| C | 2.36427100  | 2.14174200  | -1.81679500 |
| C | 3.06224000  | 2.15496000  | -3.03495800 |
| C | 1.15181600  | 2.83765200  | -1.74171600 |
| C | 2.52151100  | 2.78262100  | -4.15666200 |
| H | 4.02600100  | 1.67467500  | -3.10666400 |
| C | 0.61833900  | 3.47731500  | -2.86170300 |
| H | 0.62354800  | 2.88038600  | -0.79875600 |
| C | 1.29208000  | 3.43938700  | -4.08080100 |
| H | 3.07251400  | 2.76581400  | -5.09240000 |
| H | -0.32763500 | 4.00418700  | -2.77540600 |
| H | 0.87502300  | 3.92899800  | -4.95534100 |
| C | 4.09569800  | 2.47058400  | -0.06674000 |

|   |             |             |             |
|---|-------------|-------------|-------------|
| C | 3.78885300  | 3.56030800  | 0.75716200  |
| C | 5.42159900  | 2.27835300  | -0.47163300 |
| C | 4.78952300  | 4.43602400  | 1.17347300  |
| H | 2.76732800  | 3.70592600  | 1.08513900  |
| C | 6.42108600  | 3.15898000  | -0.05386300 |
| H | 5.67775800  | 1.44090700  | -1.10901400 |
| C | 6.11111300  | 4.24036100  | 0.76919200  |
| H | 4.53425000  | 5.27193100  | 1.81817800  |
| H | 7.44597500  | 2.99199300  | -0.37228300 |
| H | 6.89068100  | 4.92260700  | 1.09471500  |
| C | 0.98546400  | -2.66275700 | 0.69677400  |
| C | 0.18481700  | -2.90079500 | -0.42345700 |
| C | 0.65788300  | -3.27506200 | 1.91358400  |
| C | -0.92353700 | -3.75137700 | -0.32240200 |
| H | 0.43770200  | -2.47536600 | -1.38592500 |
| C | -0.44809900 | -4.10829100 | 2.01219900  |
| H | 1.27089400  | -3.07622100 | 2.78575200  |
| C | -1.24449700 | -4.35106500 | 0.88935700  |
| H | -1.53186600 | -3.93404000 | -1.20003500 |
| H | -0.69748500 | -4.56220900 | 2.96605800  |
| H | -2.11158300 | -4.99990100 | 0.96475500  |
| C | 3.43746600  | -2.47431800 | 1.16941300  |
| C | 4.34486200  | -1.87204900 | 2.04619100  |
| C | 3.69741700  | -3.76924400 | 0.70344400  |
| C | 5.50505900  | -2.54598100 | 2.43428500  |
| H | 4.13028400  | -0.88470100 | 2.43611800  |
| C | 4.85230100  | -4.44190300 | 1.09402700  |
| H | 2.99253200  | -4.24270300 | 0.03053100  |
| C | 5.76448400  | -3.83005000 | 1.95672500  |
| H | 6.20045400  | -2.06639300 | 3.11657400  |

|            |             |             |             |
|------------|-------------|-------------|-------------|
| H          | 5.04109800  | -5.44509500 | 0.72376900  |
| H          | 6.66514900  | -4.35468700 | 2.26102700  |
| H          | -1.58236200 | 2.20967100  | 0.23191500  |
| H          | -2.52852900 | 1.87693400  | -1.18637500 |
| <b>3a'</b> |             |             |             |
| C          | 7.20701500  | -2.79349500 | -1.94705600 |
| C          | 5.81913500  | -2.65269100 | -1.87663200 |
| C          | 5.20888100  | -2.06843700 | -0.75997200 |
| C          | 6.03796500  | -1.60231700 | 0.27634500  |
| C          | 7.42449500  | -1.73346900 | 0.22216500  |
| C          | 8.00452700  | -2.33861800 | -0.89435000 |
| H          | 7.66512600  | -3.25815100 | -2.81504700 |
| H          | 5.20453600  | -3.01250000 | -2.69869200 |
| H          | 8.02487500  | -1.36891700 | 1.04920500  |
| H          | 9.08397600  | -2.44850600 | -0.94443400 |
| O          | 5.46445700  | -1.06013000 | 1.41063500  |
| C          | 4.69896200  | 0.15261400  | 1.23288200  |
| H          | 4.31146000  | 0.37498700  | 2.22839700  |
| H          | 5.38132700  | 0.95681900  | 0.92922500  |
| C          | 3.56805000  | 0.00418600  | 0.23209500  |
| C          | 3.05711500  | 1.10975500  | -0.46935300 |
| C          | 2.02037800  | 0.84655000  | -1.53777600 |
| C          | 2.38516400  | -1.63550300 | -2.04290000 |
| C          | 2.36895200  | -0.20710900 | -2.60640000 |
| H          | 2.77244100  | -2.33501000 | -2.79287800 |
| H          | 1.35784200  | -1.94838600 | -1.82568000 |
| H          | 1.65000000  | -0.12618000 | -3.43019300 |
| Si         | 3.38714300  | -1.74415100 | -0.44622100 |
| C          | 2.69783700  | -3.02783400 | 0.73790900  |

|    |             |             |             |
|----|-------------|-------------|-------------|
| H  | 2.93466500  | -4.03602600 | 0.38012700  |
| H  | 3.14364900  | -2.90193100 | 1.72841600  |
| H  | 1.61370300  | -2.93141100 | 0.82787800  |
| C  | 3.58006700  | 2.49296200  | -0.33182200 |
| C  | 3.89575800  | 3.23428500  | -1.48028900 |
| C  | 3.78000200  | 3.08263900  | 0.92595000  |
| C  | 4.40854500  | 4.52659000  | -1.37758400 |
| H  | 3.75256900  | 2.79157900  | -2.46160900 |
| C  | 4.28858700  | 4.37568500  | 1.02771500  |
| H  | 3.48208200  | 2.54150400  | 1.81758000  |
| C  | 4.60646700  | 5.10284700  | -0.12166200 |
| H  | 4.65365700  | 5.08220100  | -2.27789400 |
| H  | 4.42523800  | 4.82074800  | 2.00883000  |
| H  | 5.00247800  | 6.11049300  | -0.03928100 |
| H  | 3.35087000  | 0.05172200  | -3.01982400 |
| Rh | 1.38929300  | 0.42586100  | 0.71271900  |
| Cl | 1.79799800  | 0.63155800  | 3.00102300  |
| C  | -2.40883200 | -1.56813300 | -0.80050200 |
| C  | -3.40326200 | -0.37195100 | -0.65846400 |
| C  | -2.72930600 | 0.96049200  | -0.99556400 |
| C  | -2.34288800 | 1.75594200  | 0.29464100  |
| H  | -3.79728300 | -0.35827000 | 0.36058700  |
| H  | -1.81345400 | 0.78915900  | -1.56350600 |
| P  | -0.71217700 | -0.30398000 | 1.07857700  |
| O  | -1.94980100 | 0.76756900  | 1.28055700  |
| O  | -1.11561200 | -1.13347700 | -0.29859500 |
| C  | -1.13054100 | -1.40555000 | 2.46321200  |
| C  | -0.10044000 | -2.15610000 | 3.04253500  |
| C  | -2.45346800 | -1.60479100 | 2.88296600  |
| C  | -0.39512100 | -3.11397200 | 4.01267900  |

|   |             |             |             |
|---|-------------|-------------|-------------|
| H | 0.92476500  | -1.97383000 | 2.74796000  |
| C | -2.74291500 | -2.56067800 | 3.85127700  |
| H | -3.25532700 | -1.03045500 | 2.43851500  |
| C | -1.71438400 | -3.32121100 | 4.41304400  |
| H | 0.40921600  | -3.69003100 | 4.45960200  |
| H | -3.77144200 | -2.72087200 | 4.15838700  |
| H | -1.94347800 | -4.07019300 | 5.16536200  |
| O | -3.64741800 | 1.64510700  | -1.82197800 |
| O | -4.46960500 | -0.48524300 | -1.57842600 |
| C | -4.75518600 | 0.79419900  | -2.15301800 |
| C | -4.81611500 | 0.62935800  | -3.66382300 |
| H | -3.86803900 | 0.22370700  | -4.02307200 |
| H | -5.62010000 | -0.05972600 | -3.93507300 |
| H | -5.00269700 | 1.59528300  | -4.14041300 |
| C | -6.02699600 | 1.36476400  | -1.53807100 |
| H | -6.21089800 | 2.37229300  | -1.91896400 |
| H | -6.88053300 | 0.72872900  | -1.78829600 |
| H | -5.92599100 | 1.42064200  | -0.45253500 |
| H | 1.01571500  | 0.45680400  | -1.07131300 |
| H | 1.68912100  | 1.78797700  | -1.97805700 |
| C | -2.18433200 | -1.87233800 | -2.28231100 |
| C | -1.14054400 | -1.26831000 | -2.98956100 |
| C | -3.07128500 | -2.70696200 | -2.97195000 |
| C | -0.98775100 | -1.48652500 | -4.35968000 |
| H | -0.43848800 | -0.63905600 | -2.46137900 |
| C | -2.92080200 | -2.92433600 | -4.33945700 |
| H | -3.88318600 | -3.18342500 | -2.43614600 |
| C | -1.87948700 | -2.31299000 | -5.04109300 |
| H | -0.16709900 | -1.01240000 | -4.89035600 |
| H | -3.61906900 | -3.57402200 | -4.85847600 |



|   |             |             |             |
|---|-------------|-------------|-------------|
| H | -1.76219900 | -2.48533500 | -6.10667400 |
| C | -2.87000200 | -2.80293600 | -0.03954700 |
| C | -4.21720600 | -3.01332200 | 0.26777900  |
| C | -1.92177600 | -3.75517300 | 0.35042600  |
| C | -4.60565000 | -4.14911200 | 0.98204400  |
| H | -4.96556900 | -2.29764200 | -0.05561600 |
| C | -2.30780500 | -4.87879900 | 1.07365700  |
| H | -0.87765900 | -3.59089800 | 0.10996500  |
| C | -3.65262200 | -5.07737000 | 1.39638100  |
| H | -5.65454600 | -4.30056700 | 1.21915600  |
| H | -1.55801700 | -5.59472800 | 1.39528000  |
| H | -3.95327800 | -5.95192500 | 1.96531300  |
| C | -1.20364400 | 2.73336300  | 0.03884000  |
| C | -0.96275200 | 3.25778700  | -1.23554500 |
| C | -0.40369600 | 3.14624200  | 1.11253200  |
| C | 0.06948100  | 4.17975700  | -1.43268700 |
| H | -1.59041200 | 2.96717200  | -2.07181600 |
| C | 0.62362700  | 4.06366000  | 0.91072700  |
| H | -0.57689900 | 2.73577600  | 2.10025600  |
| C | 0.86719900  | 4.58143100  | -0.36247500 |
| H | 0.24634500  | 4.58211900  | -2.42603300 |
| H | 1.25229800  | 4.35297300  | 1.74478700  |
| H | 1.68582100  | 5.27531100  | -0.51781800 |
| C | -3.56144900 | 2.46437900  | 0.87832700  |
| C | -4.26450100 | 1.92890000  | 1.96150800  |
| C | -4.02211300 | 3.64817700  | 0.28831200  |
| C | -5.42085200 | 2.55490600  | 2.43335000  |
| H | -3.89432200 | 1.03703100  | 2.44900700  |
| C | -5.17469800 | 4.27065800  | 0.75922600  |
| H | -3.47843600 | 4.07773700  | -0.54403500 |

|   |             |            |            |
|---|-------------|------------|------------|
| C | -5.88376000 | 3.72297900 | 1.83064700 |
| H | -5.95300000 | 2.12821700 | 3.27836600 |
| H | -5.51964600 | 5.18655400 | 0.28880500 |
| H | -6.78257200 | 4.20935800 | 2.19751000 |

**TS9**

|    |            |             |             |
|----|------------|-------------|-------------|
| C  | 8.32949800 | 1.25156100  | 0.13793700  |
| C  | 7.06873300 | 1.60521900  | -0.34837400 |
| C  | 6.07644400 | 0.63931000  | -0.55416500 |
| C  | 6.37755200 | -0.69763100 | -0.23013200 |
| C  | 7.63034500 | -1.06609600 | 0.25832500  |
| C  | 8.60744900 | -0.08462100 | 0.43439900  |
| H  | 9.09199100 | 2.01124600  | 0.28184000  |
| H  | 6.85938500 | 2.64739100  | -0.57893300 |
| H  | 7.82400800 | -2.10951100 | 0.48460000  |
| H  | 9.58715800 | -0.36492900 | 0.81059100  |
| O  | 5.44678000 | -1.68767700 | -0.47232000 |
| C  | 4.18693500 | -1.61803700 | 0.23585100  |
| H  | 3.57818700 | -2.39676300 | -0.23056300 |
| H  | 4.36212900 | -1.87802200 | 1.28766900  |
| C  | 3.50565000 | -0.27255100 | 0.12283000  |
| C  | 2.67207500 | 0.21756800  | 1.13895000  |
| C  | 2.03087800 | 1.50573200  | 0.91457400  |
| C  | 3.61376700 | 2.60508700  | -0.83858600 |
| C  | 2.86589000 | 2.72265600  | 0.50181600  |
| H  | 1.28186500 | 1.75104300  | 1.65379900  |
| H  | 4.39479700 | 3.37171200  | -0.90110500 |
| H  | 2.91307900 | 2.80679200  | -1.65851500 |
| H  | 2.20970200 | 3.59839100  | 0.49384800  |
| Si | 4.31064000 | 0.87486700  | -1.13674500 |

|    |             |             |             |
|----|-------------|-------------|-------------|
| C  | 4.09806700  | 0.32936400  | -2.91812600 |
| H  | 4.38775800  | -0.71917200 | -3.02205500 |
| H  | 3.05187900  | 0.41872100  | -3.22301300 |
| H  | 4.72244000  | 0.93522400  | -3.58458100 |
| C  | 2.31293100  | -0.53763400 | 2.37081200  |
| C  | 2.46490900  | 0.08918300  | 3.61509800  |
| C  | 1.79941300  | -1.84129500 | 2.32165900  |
| C  | 2.11900700  | -0.57400600 | 4.79165100  |
| H  | 2.85332500  | 1.10209000  | 3.65545700  |
| C  | 1.44298800  | -2.49780800 | 3.49896900  |
| H  | 1.64238000  | -2.32001000 | 1.36067800  |
| C  | 1.60197000  | -1.86939600 | 4.73552500  |
| H  | 2.24984900  | -0.07911200 | 5.74963200  |
| H  | 1.03566200  | -3.50227600 | 3.44951700  |
| H  | 1.32404500  | -2.38588900 | 5.64938400  |
| H  | 1.20596800  | 1.59237700  | -0.58246600 |
| H  | 3.58724200  | 2.88625500  | 1.31415000  |
| Rh | 1.32041000  | 0.04353700  | -0.56213500 |
| Cl | 1.47152400  | -2.00945200 | -1.74159000 |
| C  | -2.35026300 | 1.76247000  | 0.49025000  |
| C  | -3.12030300 | 0.45393900  | 0.79423700  |
| C  | -2.34482500 | -0.87701400 | 0.91413900  |
| C  | -2.34388100 | -1.72514300 | -0.38752200 |
| H  | -3.87102600 | 0.36049100  | 0.00364000  |
| H  | -1.29555700 | -0.70778700 | 1.18747900  |
| P  | -0.76561100 | 0.36076800  | -1.33710500 |
| O  | -1.84049000 | -0.87237000 | -1.45359200 |
| O  | -1.67766100 | 1.61640100  | -0.78069200 |
| C  | -0.76470600 | 0.84333800  | -3.08860900 |
| C  | -0.46583200 | -0.13140700 | -4.05178300 |

|   |             |             |             |
|---|-------------|-------------|-------------|
| C | -0.96002200 | 2.17557700  | -3.47578100 |
| C | -0.38563900 | 0.22794500  | -5.39567300 |
| H | -0.27826300 | -1.15298900 | -3.74154300 |
| C | -0.87436600 | 2.52620300  | -4.82353700 |
| H | -1.18720100 | 2.92604400  | -2.72761500 |
| C | -0.58910900 | 1.55438900  | -5.78369200 |
| H | -0.15693500 | -0.52838600 | -6.14025400 |
| H | -1.03232800 | 3.55831700  | -5.12214500 |
| H | -0.52118100 | 1.83018500  | -6.83183900 |
| O | -3.00003600 | -1.55587600 | 1.97781400  |
| O | -3.75078100 | 0.58829500  | 2.05949500  |
| C | -4.02937200 | -0.71820600 | 2.54123600  |
| C | -3.88157400 | -0.72238900 | 4.05410500  |
| H | -2.87083000 | -0.42229500 | 4.33608600  |
| H | -4.59712100 | -0.02814100 | 4.50145600  |
| H | -4.07373100 | -1.72522300 | 4.44313800  |
| C | -5.41410900 | -1.17049000 | 2.08739500  |
| H | -5.57277700 | -2.21993000 | 2.34441000  |
| H | -6.17406100 | -0.56221000 | 2.58558000  |
| H | -5.53038400 | -1.06276100 | 1.00911300  |
| C | -3.42533600 | 2.83318500  | 0.25012800  |
| C | -3.90334300 | 3.08566200  | -1.03929300 |
| C | -3.99576900 | 3.50775900  | 1.33551700  |
| C | -4.92439100 | 4.01593800  | -1.24157900 |
| H | -3.46933500 | 2.56090600  | -1.88134800 |
| C | -5.01925500 | 4.43069000  | 1.13142300  |
| H | -3.63918200 | 3.30435900  | 2.33815200  |
| C | -5.48489500 | 4.69191500  | -0.15865800 |
| H | -5.27968000 | 4.21004200  | -2.24934800 |
| H | -5.45196000 | 4.94823500  | 1.98237300  |

|   |             |             |             |
|---|-------------|-------------|-------------|
| H | -6.27852900 | 5.41596800  | -0.31691900 |
| C | -1.36368200 | 2.24830900  | 1.55123800  |
| C | -1.07273300 | 1.56814800  | 2.73620100  |
| C | -0.76797000 | 3.49989500  | 1.33280600  |
| C | -0.23050100 | 2.13919700  | 3.69448300  |
| H | -1.50820400 | 0.60224400  | 2.93753500  |
| C | 0.07201200  | 4.07009400  | 2.28482800  |
| H | -0.98904400 | 4.03425400  | 0.41493900  |
| C | 0.33745700  | 3.39292100  | 3.47853200  |
| H | -0.01613800 | 1.58935000  | 4.60421700  |
| H | 0.51313300  | 5.04478700  | 2.09996500  |
| H | 0.98541400  | 3.83770700  | 4.22765200  |
| C | -3.75970300 | -2.11352200 | -0.81236000 |
| C | -4.48443900 | -1.34200900 | -1.72719800 |
| C | -4.36003600 | -3.24975500 | -0.25583100 |
| C | -5.79520500 | -1.68819500 | -2.06141600 |
| H | -4.01408900 | -0.48129600 | -2.18692100 |
| C | -5.66596900 | -3.59664300 | -0.59369300 |
| H | -3.79989500 | -3.85722500 | 0.44454100  |
| C | -6.39149600 | -2.81377000 | -1.49362900 |
| H | -6.34498700 | -1.07909000 | -2.77265200 |
| H | -6.11760900 | -4.48027000 | -0.15276300 |
| H | -7.40955700 | -3.08457400 | -1.75685100 |
| C | -1.48178700 | -2.97702400 | -0.28756000 |
| C | -1.30524900 | -3.73398100 | -1.45225400 |
| C | -0.92143400 | -3.42706600 | 0.90807200  |
| C | -0.56856600 | -4.91102900 | -1.42901800 |
| H | -1.74250500 | -3.38184000 | -2.38026600 |
| C | -0.18246300 | -4.61363700 | 0.93133100  |
| H | -1.06942100 | -2.87617000 | 1.82808000  |

|   |             |             |             |
|---|-------------|-------------|-------------|
| C | 0.00012600  | -5.35484700 | -0.23290100 |
| H | -0.42805500 | -5.47814600 | -2.34385700 |
| H | 0.24412700  | -4.96236800 | 1.86718900  |
| H | 0.57718600  | -6.27435500 | -0.21038500 |

**D'**

|    |            |             |             |
|----|------------|-------------|-------------|
| C  | 8.08964500 | -1.64585000 | -0.36040900 |
| C  | 6.86855400 | -1.80962200 | 0.29816200  |
| C  | 6.01550500 | -0.72237500 | 0.51967000  |
| C  | 6.41113600 | 0.53976700  | 0.03333700  |
| C  | 7.62523700 | 0.71798000  | -0.62863500 |
| C  | 8.46586700 | -0.38077600 | -0.81681200 |
| H  | 8.74555100 | -2.49754000 | -0.51426600 |
| H  | 6.58099200 | -2.79737000 | 0.65131100  |
| H  | 7.89716300 | 1.70897700  | -0.97716900 |
| H  | 9.41533900 | -0.24789400 | -1.32751500 |
| O  | 5.62868400 | 1.64869900  | 0.28523600  |
| C  | 4.28208100 | 1.67670800  | -0.25561200 |
| H  | 3.80449100 | 2.50818900  | 0.26920000  |
| H  | 4.34675900 | 1.91370200  | -1.32406200 |
| C  | 3.51468800 | 0.39584000  | -0.01271600 |
| C  | 2.70647100 | -0.20008500 | -1.00295700 |
| C  | 1.92550600 | -1.36117000 | -0.65539800 |
| C  | 3.39362800 | -2.34577100 | 1.29619600  |
| C  | 2.50626900 | -2.57827700 | 0.05306100  |
| H  | 1.20841100 | -1.64397500 | -1.41434800 |
| H  | 4.08989400 | -3.18431600 | 1.41710800  |
| H  | 2.76616300 | -2.35008500 | 2.19682900  |
| H  | 1.67608100 | -3.24305300 | 0.31078200  |
| Si | 4.31126900 | -0.69478700 | 1.29890300  |

|    |             |             |             |
|----|-------------|-------------|-------------|
| C  | 4.35287000  | 0.07677300  | 3.00739400  |
| H  | 4.88091300  | 1.03298400  | 2.96913700  |
| H  | 3.33842700  | 0.26900700  | 3.36706800  |
| H  | 4.86993700  | -0.57845500 | 3.71721200  |
| C  | 2.37613900  | 0.48023800  | -2.28885100 |
| C  | 2.51969100  | -0.22879500 | -3.48888400 |
| C  | 1.88127700  | 1.79246700  | -2.32665400 |
| C  | 2.19273400  | 0.36463900  | -4.70610000 |
| H  | 2.88657200  | -1.24940000 | -3.45742200 |
| C  | 1.52925300  | 2.37527400  | -3.54486500 |
| H  | 1.75097500  | 2.35275700  | -1.40432100 |
| C  | 1.68900000  | 1.66720700  | -4.73615500 |
| H  | 2.32351700  | -0.19060800 | -5.63036800 |
| H  | 1.13666200  | 3.38628400  | -3.56203400 |
| H  | 1.42419500  | 2.12768800  | -5.68317300 |
| H  | 1.67298800  | -0.58799600 | 1.70483400  |
| H  | 3.09102400  | -3.11943400 | -0.70546900 |
| Rh | 1.29282200  | 0.31805700  | 0.57835800  |
| Cl | 1.52213200  | 2.32415300  | 1.87088500  |
| C  | -2.27436400 | -1.85036700 | -0.44767300 |
| C  | -3.12682000 | -0.60043100 | -0.78183100 |
| C  | -2.41724900 | 0.75453300  | -0.98661400 |
| C  | -2.44319600 | 1.66738600  | 0.27043100  |
| H  | -3.85738400 | -0.50595100 | 0.02727800  |
| H  | -1.36255500 | 0.61074400  | -1.25398700 |
| P  | -0.75898700 | -0.25996100 | 1.30897000  |
| O  | -1.96498100 | 0.85921300  | 1.38041300  |
| O  | -1.54066800 | -1.61216200 | 0.77699600  |
| C  | -0.72671200 | -0.70449800 | 3.07093700  |
| C  | -0.46268400 | 0.30949100  | 4.00335300  |

|   |             |             |             |
|---|-------------|-------------|-------------|
| C | -0.86334000 | -2.03210400 | 3.49627800  |
| C | -0.36316400 | -0.00709900 | 5.35663500  |
| H | -0.30733000 | 1.32752100  | 3.66342700  |
| C | -0.75620500 | -2.33982100 | 4.85322200  |
| H | -1.05779800 | -2.81222600 | 2.77012500  |
| C | -0.50974400 | -1.32924300 | 5.78347500  |
| H | -0.16090800 | 0.77908100  | 6.07750900  |
| H | -0.86632000 | -3.36900900 | 5.18177600  |
| H | -0.42533700 | -1.57163000 | 6.83867500  |
| O | -3.09285000 | 1.33739600  | -2.09059700 |
| O | -3.78405800 | -0.82804300 | -2.01934700 |
| C | -4.11265900 | 0.43706000  | -2.57487700 |
| C | -4.00049500 | 0.35107200  | -4.08821500 |
| H | -2.99290800 | 0.04829200  | -4.37754400 |
| H | -4.71497100 | -0.38026800 | -4.47376800 |
| H | -4.21986800 | 1.32498500  | -4.53238900 |
| C | -5.49997500 | 0.87776800  | -2.11790700 |
| H | -5.69706100 | 1.90263500  | -2.43886100 |
| H | -6.25051400 | 0.21541000  | -2.55794900 |
| H | -5.59054700 | 0.83670300  | -1.03278600 |
| C | -3.28168800 | -2.95726900 | -0.10590000 |
| C | -3.71741600 | -3.13962100 | 1.21019400  |
| C | -3.84450600 | -3.73231600 | -1.12600600 |
| C | -4.68505500 | -4.10149300 | 1.50462500  |
| H | -3.29210100 | -2.53497600 | 2.00157100  |
| C | -4.81501200 | -4.68752300 | -0.83037600 |
| H | -3.52369900 | -3.58198100 | -2.14986900 |
| C | -5.23561800 | -4.87960300 | 0.48686700  |
| H | -5.00670500 | -4.24018200 | 2.53262700  |
| H | -5.24167500 | -5.28386100 | -1.63132600 |



|   |             |             |             |
|---|-------------|-------------|-------------|
| H | -5.98744900 | -5.62866600 | 0.71662500  |
| C | -1.30522800 | -2.32934100 | -1.52662600 |
| C | -1.04898900 | -1.65551300 | -2.72366300 |
| C | -0.65102700 | -3.54744000 | -1.29040300 |
| C | -0.17176500 | -2.19462500 | -3.66763200 |
| H | -1.53239000 | -0.71664800 | -2.94369900 |
| C | 0.22773700  | -4.08367900 | -2.22680400 |
| H | -0.84547700 | -4.07764000 | -0.36437300 |
| C | 0.46702000  | -3.40900000 | -3.42639200 |
| H | 0.01564300  | -1.65024900 | -4.58646400 |
| H | 0.72385500  | -5.02720300 | -2.02143900 |
| H | 1.14682500  | -3.82635500 | -4.16308500 |
| C | -3.86509500 | 2.07701600  | 0.64584400  |
| C | -4.60600600 | 1.35760000  | 1.58950400  |
| C | -4.45537600 | 3.17803700  | 0.01297800  |
| C | -5.92348500 | 1.71994700  | 1.87771500  |
| H | -4.14369500 | 0.52590800  | 2.10692300  |
| C | -5.76792500 | 3.54067200  | 0.30461100  |
| H | -3.88274000 | 3.74522500  | -0.71079000 |
| C | -6.50990000 | 2.80914300  | 1.23404300  |
| H | -6.48640100 | 1.15193500  | 2.61227000  |
| H | -6.21209800 | 4.39622900  | -0.19527300 |
| H | -7.53331700 | 3.09213500  | 1.46108700  |
| C | -1.57344200 | 2.90848500  | 0.12236500  |
| C | -1.40452200 | 3.71930600  | 1.25107800  |
| C | -1.00758100 | 3.30352700  | -1.09167000 |
| C | -0.67532800 | 4.89848900  | 1.17472400  |
| H | -1.84291600 | 3.40830500  | 2.19294900  |
| C | -0.27772900 | 4.49376800  | -1.16778600 |
| H | -1.15262200 | 2.71232500  | -1.98753000 |

|   |             |            |             |
|---|-------------|------------|-------------|
| C | -0.10663400 | 5.29035900 | -0.03895700 |
| H | -0.53774400 | 5.50596900 | 2.06334700  |
| H | 0.14666300  | 4.80353400 | -2.11796100 |
| H | 0.46402900  | 6.21181000 | -0.10230500 |

**TS10**

|   |             |             |             |
|---|-------------|-------------|-------------|
| C | -6.31428700 | 1.94226500  | 0.95005800  |
| C | -5.23558800 | 1.34649500  | 0.27060600  |
| C | -5.45717400 | 0.93863000  | -1.05921100 |
| C | -6.70854500 | 1.09971300  | -1.66803300 |
| C | -7.75301000 | 1.68392100  | -0.96094500 |
| C | -7.56031600 | 2.11646000  | 0.35512700  |
| H | -6.17290900 | 2.26480300  | 1.97989300  |
| H | -6.83346500 | 0.76495600  | -2.69250000 |
| H | -8.71981400 | 1.80823400  | -1.44018500 |
| H | -8.37405100 | 2.57608800  | 0.90728200  |
| C | -3.75872500 | -0.02247700 | 2.68627200  |
| C | -2.97683200 | -2.05937500 | 1.23969600  |
| C | -3.80264100 | -1.53566800 | 2.39801700  |
| H | -4.63401100 | 0.26967100  | 3.27800300  |
| H | -2.86988700 | 0.18624500  | 3.29114800  |
| H | -4.83942500 | -1.84176700 | 2.19097800  |
| H | -3.48605400 | -2.08354100 | 3.28934200  |
| C | -2.65674700 | 2.60183300  | 1.40499000  |
| H | -2.22239600 | 2.97344300  | 0.47194800  |
| H | -3.32549500 | 3.37539600  | 1.79771000  |
| H | -1.84816200 | 2.44424800  | 2.12176600  |
| C | -3.12067300 | 0.53688800  | -1.55361300 |
| C | -2.78878400 | -0.08159600 | -0.20116100 |
| C | -2.86041200 | -1.54023600 | -0.05555100 |

|    |             |             |             |
|----|-------------|-------------|-------------|
| C  | -2.62344400 | -2.46343500 | -1.20144100 |
| C  | -1.66992800 | -2.20446200 | -2.19896300 |
| C  | -3.37365900 | -3.64374300 | -1.28959200 |
| C  | -1.46908500 | -3.09962000 | -3.24508500 |
| H  | -1.04995700 | -1.31944800 | -2.12719600 |
| C  | -3.17105700 | -4.54597700 | -2.33424100 |
| H  | -4.12697700 | -3.84902400 | -0.53572800 |
| C  | -2.21752700 | -4.27752700 | -3.31627000 |
| H  | -0.71318800 | -2.88706800 | -3.99543600 |
| H  | -3.76165800 | -5.45584000 | -2.38156200 |
| H  | -2.05732600 | -4.97842300 | -4.12979400 |
| O  | -4.50812600 | 0.33626900  | -1.84780900 |
| Si | -3.59563700 | 0.99861000  | 1.12005800  |
| Rh | -1.09181900 | -0.76658800 | 0.98463000  |
| Cl | -0.49040700 | -1.86873400 | 3.03737500  |
| H  | -1.23761900 | 0.11303000  | -0.35855200 |
| H  | -2.73132600 | -3.11441200 | 1.33096900  |
| H  | -2.60164200 | 0.08912500  | -2.39522600 |
| H  | -2.89487000 | 1.60734600  | -1.54635000 |
| C  | 1.62111000  | 1.93546700  | -0.91979900 |
| C  | 2.67598400  | 0.82725500  | -1.17939700 |
| C  | 2.21171500  | -0.63853700 | -1.08142500 |
| C  | 2.57393300  | -1.32377400 | 0.26501200  |
| H  | 3.49236800  | 1.00878900  | -0.47335500 |
| H  | 1.12265900  | -0.69726200 | -1.17232800 |
| P  | 0.77392900  | 0.46061100  | 1.33493900  |
| O  | 2.18720500  | -0.37777200 | 1.30636400  |
| O  | 1.08375100  | 1.79322400  | 0.41127000  |
| C  | 1.01658100  | 1.28196900  | 2.94012300  |
| C  | 1.52660100  | 0.56158100  | 4.02853200  |

|   |             |             |             |
|---|-------------|-------------|-------------|
| C | 0.67049800  | 2.63163600  | 3.09768500  |
| C | 1.68728000  | 1.19220300  | 5.26121500  |
| H | 1.78560800  | -0.48123800 | 3.90570600  |
| C | 0.83015100  | 3.25355600  | 4.33573200  |
| H | 0.30193700  | 3.19620100  | 2.24995500  |
| C | 1.33582300  | 2.53402400  | 5.41929800  |
| H | 2.08505400  | 0.63095800  | 6.10119400  |
| H | 0.56495900  | 4.30035400  | 4.44977700  |
| H | 1.45961700  | 3.01863000  | 6.38326700  |
| O | 2.79835700  | -1.27679300 | -2.20626500 |
| O | 3.13667500  | 0.95080300  | -2.51732100 |
| C | 3.59748000  | -0.32592300 | -2.94098200 |
| C | 3.29819300  | -0.48890800 | -4.42279300 |
| H | 3.84301800  | 0.26383300  | -4.99761100 |
| H | 3.61201000  | -1.48087200 | -4.75661000 |
| H | 2.23028200  | -0.37175400 | -4.61285700 |
| C | 5.08407300  | -0.48358300 | -2.63501300 |
| H | 5.40865000  | -1.50450100 | -2.84503400 |
| H | 5.65339500  | 0.20828000  | -3.26187300 |
| H | 5.29990400  | -0.26466500 | -1.58994800 |
| C | 0.46177600  | 2.02637400  | -1.91690500 |
| C | 0.23873600  | 1.13244400  | -2.96824100 |
| C | -0.38408000 | 3.14023100  | -1.79898000 |
| C | -0.77117600 | 1.37270200  | -3.90500100 |
| H | 0.86581900  | 0.26312400  | -3.09249800 |
| C | -1.39130400 | 3.38059800  | -2.72952300 |
| H | -0.21983100 | 3.83974000  | -0.98644500 |
| C | -1.57821000 | 2.50299000  | -3.80087400 |
| H | -0.91789900 | 0.67069800  | -4.72049100 |
| H | -2.02310000 | 4.25737600  | -2.62500700 |

|   |             |             |             |
|---|-------------|-------------|-------------|
| H | -2.35556500 | 2.69144100  | -4.53457500 |
| C | 2.39949900  | 3.25990600  | -0.90819900 |
| C | 2.86443100  | 3.80228200  | 0.29312100  |
| C | 2.71874900  | 3.89347400  | -2.11501800 |
| C | 3.62375800  | 4.97394200  | 0.28785800  |
| H | 2.62212000  | 3.31448200  | 1.22890500  |
| C | 3.48161000  | 5.05909900  | -2.11730000 |
| H | 2.37279800  | 3.46829200  | -3.04957500 |
| C | 3.93406000  | 5.60661200  | -0.91507500 |
| H | 3.97030600  | 5.39036700  | 1.22915500  |
| H | 3.72077700  | 5.54154400  | -3.06033900 |
| H | 4.52335100  | 6.51873700  | -0.91775200 |
| C | 1.84866000  | -2.64992400 | 0.45874300  |
| C | 0.98730000  | -3.18776000 | -0.49898200 |
| C | 2.06224600  | -3.35423500 | 1.64897000  |
| C | 0.32467600  | -4.39443600 | -0.26261800 |
| H | 0.83338000  | -2.69131300 | -1.44572200 |
| C | 1.41145500  | -4.55910800 | 1.88462500  |
| H | 2.72864300  | -2.94001900 | 2.39764100  |
| C | 0.53311800  | -5.08010500 | 0.93134700  |
| H | -0.35368900 | -4.78361800 | -1.01497200 |
| H | 1.57334500  | -5.08320800 | 2.82117900  |
| H | 0.01729600  | -6.01700300 | 1.12046200  |
| C | 4.07692600  | -1.50920300 | 0.42709600  |
| C | 4.85906400  | -0.57840100 | 1.11867000  |
| C | 4.69733800  | -2.62061400 | -0.15725000 |
| C | 6.24288800  | -0.74666800 | 1.20598700  |
| H | 4.38036500  | 0.26551700  | 1.59987200  |
| C | 6.07656300  | -2.78854000 | -0.06621600 |
| H | 4.09322000  | -3.34835600 | -0.68553300 |

|   |            |             |             |
|---|------------|-------------|-------------|
| C | 6.85624600 | -1.84855200 | 0.61109100  |
| H | 6.83790200 | -0.01659200 | 1.74647900  |
| H | 6.54364500 | -3.65483700 | -0.52513900 |
| H | 7.93182100 | -1.97977500 | 0.68196600  |

**4a'**

|   |             |             |             |
|---|-------------|-------------|-------------|
| C | -6.55735900 | 1.77539400  | 0.89274700  |
| C | -5.49556500 | 1.19703500  | 0.17191300  |
| C | -5.82195800 | 0.50286000  | -1.00836800 |
| C | -7.15026100 | 0.37148200  | -1.43199400 |
| C | -8.17251300 | 0.95047800  | -0.68923000 |
| C | -7.88075300 | 1.66563300  | 0.47714200  |
| H | -6.33747900 | 2.31271100  | 1.81314100  |
| H | -7.35182700 | -0.17892400 | -2.34494800 |
| H | -9.20072700 | 0.84952600  | -1.02429200 |
| H | -8.67801900 | 2.12196800  | 1.05529700  |
| C | -3.67562500 | 0.33569100  | 2.50963900  |
| C | -3.07239100 | -1.83767700 | 1.21539500  |
| C | -3.83630100 | -1.18567300 | 2.34691600  |
| H | -4.44389900 | 0.72254400  | 3.19012700  |
| H | -2.69782000 | 0.54217500  | 2.95815800  |
| H | -4.89911400 | -1.42874100 | 2.19393800  |
| H | -3.53029300 | -1.68780200 | 3.26909100  |
| C | -2.96786900 | 2.89660600  | 0.87217700  |
| H | -2.97936600 | 3.36146300  | -0.11696600 |
| H | -3.50646800 | 3.55422600  | 1.56275800  |
| H | -1.92951500 | 2.82500400  | 1.20866700  |
| C | -3.55155300 | 0.37336500  | -1.78598200 |
| C | -2.87823000 | 0.07031200  | -0.43016800 |
| C | -2.84564700 | -1.40432200 | -0.08125200 |

|    |             |             |             |
|----|-------------|-------------|-------------|
| C  | -2.50821700 | -2.39044400 | -1.14639000 |
| C  | -1.56450000 | -2.09050000 | -2.14355200 |
| C  | -3.12642000 | -3.64833500 | -1.17504600 |
| C  | -1.23542600 | -3.02311600 | -3.12267400 |
| H  | -1.06421400 | -1.12980300 | -2.13412000 |
| C  | -2.79532700 | -4.58627900 | -2.15256800 |
| H  | -3.88109400 | -3.88540600 | -0.43257900 |
| C  | -1.84718200 | -4.27920000 | -3.12960000 |
| H  | -0.49134500 | -2.77358400 | -3.87367000 |
| H  | -3.28565600 | -5.55510800 | -2.15524000 |
| H  | -1.59139000 | -5.00813300 | -3.89246800 |
| O  | -4.89212600 | -0.11050500 | -1.81060600 |
| Si | -3.74506500 | 1.18558800  | 0.84263400  |
| Rh | -1.03353700 | -0.71529300 | 0.93363300  |
| Cl | -0.45651700 | -1.93757400 | 2.85946200  |
| H  | -1.78618600 | 0.42624200  | -0.55061800 |
| H  | -2.87382600 | -2.89227900 | 1.38496000  |
| H  | -3.06137200 | -0.12110400 | -2.62209400 |
| H  | -3.54404200 | 1.45252300  | -1.97145600 |
| C  | 1.64482800  | 1.93337000  | -0.90908800 |
| C  | 2.75210400  | 0.87371000  | -1.14600300 |
| C  | 2.35048700  | -0.61064100 | -1.03163500 |
| C  | 2.72327400  | -1.26816300 | 0.32476400  |
| H  | 3.55392200  | 1.10280100  | -0.43686100 |
| H  | 1.26507400  | -0.71596000 | -1.13279100 |
| P  | 0.82429100  | 0.44377800  | 1.33010600  |
| O  | 2.27073300  | -0.33950600 | 1.35375100  |
| O  | 1.13666300  | 1.80169600  | 0.43264500  |
| C  | 0.96220000  | 1.25462000  | 2.95076000  |
| C  | 1.48550000  | 0.55727400  | 4.04703100  |

|   |             |             |             |
|---|-------------|-------------|-------------|
| C | 0.48425200  | 2.56172600  | 3.11834400  |
| C | 1.53479400  | 1.17102800  | 5.29773800  |
| H | 1.84176900  | -0.45603400 | 3.91510300  |
| C | 0.53436700  | 3.16792100  | 4.37293600  |
| H | 0.09832600  | 3.10840200  | 2.26555500  |
| C | 1.05766100  | 2.47240900  | 5.46439700  |
| H | 1.94364800  | 0.62878200  | 6.14492900  |
| H | 0.16968500  | 4.18343000  | 4.49577800  |
| H | 1.09535500  | 2.94430400  | 6.44178700  |
| O | 2.97511200  | -1.23747900 | -2.14245800 |
| O | 3.21597300  | 0.99771800  | -2.48327000 |
| C | 3.73908600  | -0.26290000 | -2.88225300 |
| C | 3.46555800  | -0.46099900 | -4.36480600 |
| H | 3.98106300  | 0.30836100  | -4.94466000 |
| H | 3.82963500  | -1.44172900 | -4.68020000 |
| H | 2.39558000  | -0.39791700 | -4.56894000 |
| C | 5.22773600  | -0.34742100 | -2.55748000 |
| H | 5.60124300  | -1.35535400 | -2.74783800 |
| H | 5.77214600  | 0.36043400  | -3.18864300 |
| H | 5.42085800  | -0.10315900 | -1.51357700 |
| C | 0.47045900  | 1.92679800  | -1.89095900 |
| C | 0.30444800  | 1.01337100  | -2.93572700 |
| C | -0.46301700 | 2.96581500  | -1.75832400 |
| C | -0.74508300 | 1.15825500  | -3.84809300 |
| H | 1.00072400  | 0.20049100  | -3.07092500 |
| C | -1.50434200 | 3.11567200  | -2.66866100 |
| H | -0.34513600 | 3.67673400  | -0.94819900 |
| C | -1.64096200 | 2.21761300  | -3.73087300 |
| H | -0.85008400 | 0.44109500  | -4.65671800 |
| H | -2.20199400 | 3.94059600  | -2.55864000 |



|   |             |             |             |
|---|-------------|-------------|-------------|
| H | -2.44610000 | 2.33691400  | -4.44922300 |
| C | 2.34028100  | 3.30202100  | -0.94569900 |
| C | 2.75579100  | 3.92110400  | 0.23657100  |
| C | 2.62243300  | 3.91038800  | -2.17449600 |
| C | 3.43368700  | 5.14090700  | 0.18956600  |
| H | 2.53711100  | 3.45339800  | 1.18866600  |
| C | 3.30402300  | 5.12441600  | -2.21801700 |
| H | 2.31136100  | 3.42783000  | -3.09336300 |
| C | 3.70976800  | 5.74645600  | -1.03544200 |
| H | 3.74358800  | 5.61639100  | 1.11554500  |
| H | 3.51599300  | 5.58650200  | -3.17763000 |
| H | 4.23583900  | 6.69582600  | -1.07039000 |
| C | 2.06011900  | -2.62701100 | 0.51571100  |
| C | 1.20366200  | -3.19349600 | -0.42933300 |
| C | 2.31970800  | -3.32674500 | 1.69995800  |
| C | 0.59622700  | -4.42741600 | -0.18760900 |
| H | 1.00347200  | -2.69682900 | -1.36771400 |
| C | 1.72375800  | -4.55881900 | 1.94030800  |
| H | 2.98360100  | -2.89001800 | 2.43843700  |
| C | 0.85258500  | -5.11070100 | 0.99813500  |
| H | -0.08065500 | -4.83844800 | -0.92910300 |
| H | 1.92501100  | -5.08207400 | 2.86996600  |
| H | 0.37835300  | -6.06876100 | 1.19002800  |
| C | 4.23118100  | -1.37612700 | 0.51037700  |
| C | 4.95397800  | -0.40012400 | 1.20412700  |
| C | 4.91695200  | -2.45886600 | -0.05445200 |
| C | 6.34324600  | -0.49536000 | 1.31279800  |
| H | 4.42442000  | 0.42155800  | 1.67042900  |
| C | 6.30151900  | -2.55449300 | 0.05836900  |
| H | 4.35894200  | -3.22147700 | -0.58424100 |

|   |            |             |             |
|---|------------|-------------|-------------|
| C | 7.02151300 | -1.56935900 | 0.73760400  |
| H | 6.89168500 | 0.26939200  | 1.85465700  |
| H | 6.81953900 | -3.39952500 | -0.38533500 |
| H | 8.10127500 | -1.64408300 | 0.82523600  |

## 5. References

- [1] P.-H. Chen, T. Xu, G. Dong, Divergent Syntheses of Fused  $\beta$ -Naphthol and Indene Scaffolds by Rhodium-Catalyzed Direct and Decarbonylative Alkyne–Benzocyclobutenone Couplings, *Angew. Chem. Int. Ed.* 2014, **53**, 1674-1678.
- [2] S. Kassamba, M. Reboli, A. Perez-Luna, F. Ferreira, M Durandetti, Synthesis of 6-membered germacycles by intramolecular germylzincation of alkynes, *Org. Chem. Front.* 2023, **10**, 3328-3335.
- [3] W.-K. Zhu, H.-J. Zhu, X.-J. Fang, F. Ye, J. Cao, Z. Xu, L.-W. Xu, Rhodium-Catalyzed Hydrolytic Cleavage of the Silicon–Carbon Bond of Silacyclobutanes to Access Silanols, *Org. Lett.* 2023, **25**, 7186-7191.
- [4] L. Deng, L. Jin, G. Dong, Fused-Ring Formation by an Intramolecular “Cut-and-Sew” Reaction between Cyclobutanones and Alkynes, *Angew. Chem. Int. Ed.* 2018, **57**, 2702-2706.
- [5] M. Durandetti, L. Hardou, R. Lhermet, M. Rouen, J. Maddaluno, Synthetic Applications of the Nickel-Catalyzed Cyclization of Alkynes Combined with Addition Reactions in a Domino Process, *Chem. Eur. J.* 2011, **17**, 12773-12783.
- [6] D. Bouyssi, G. Balme, New Palladium-Catalysed Access to 3-(1'-Indanylidene) Phthalide, Precursor of the Core of Fredericamycin, *Synlett*, 2001, **7**, 1191-1193.

## 6. NMR Spectra

### $^1\text{H}$ NMR spectrum of S9

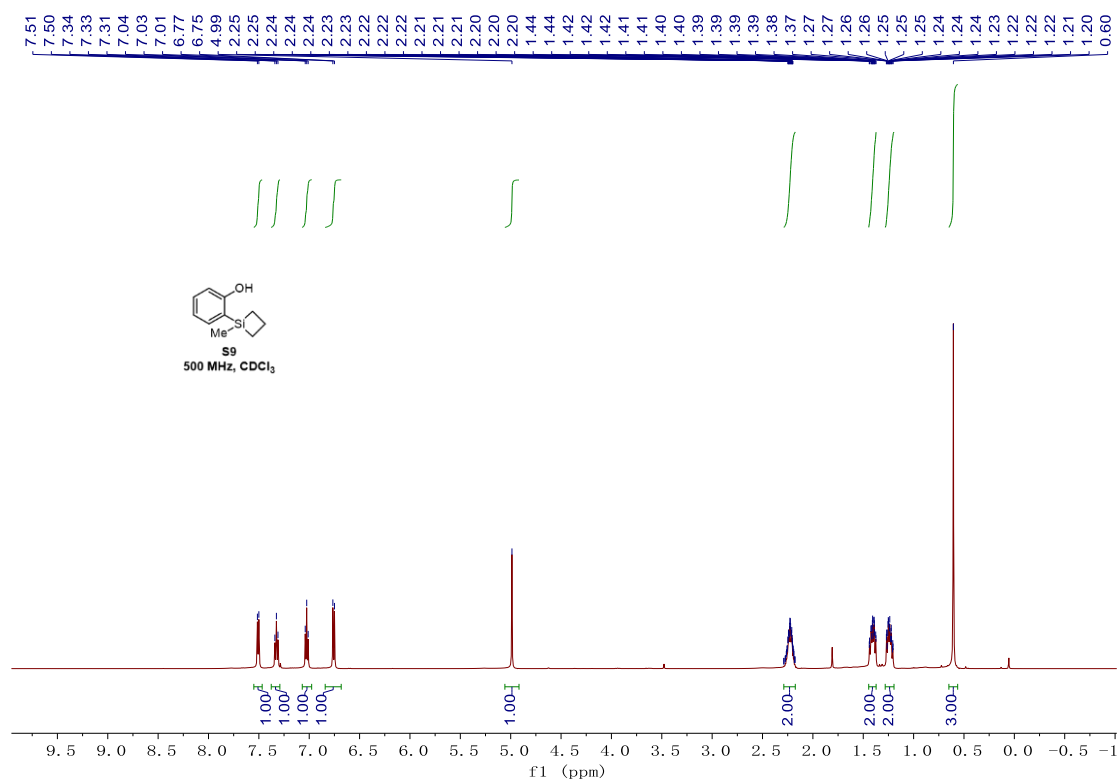

### $^{13}\text{C}$ NMR spectrum of S9

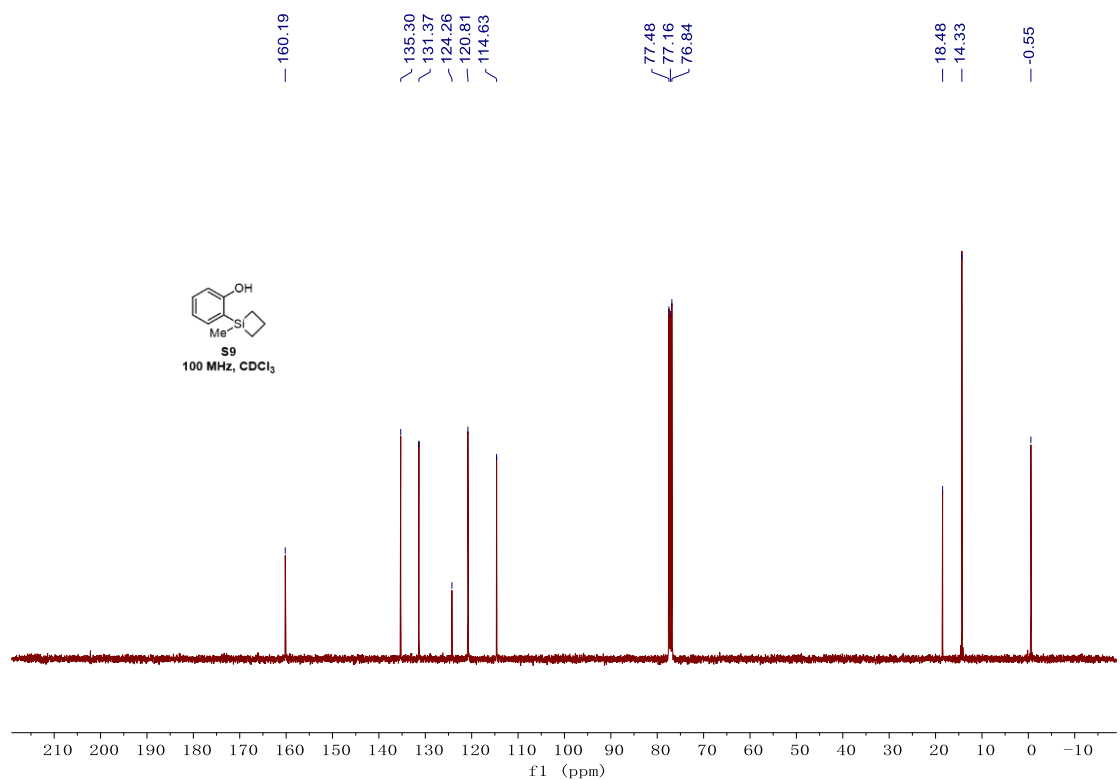



# <sup>1</sup>H NMR spectrum of 1a

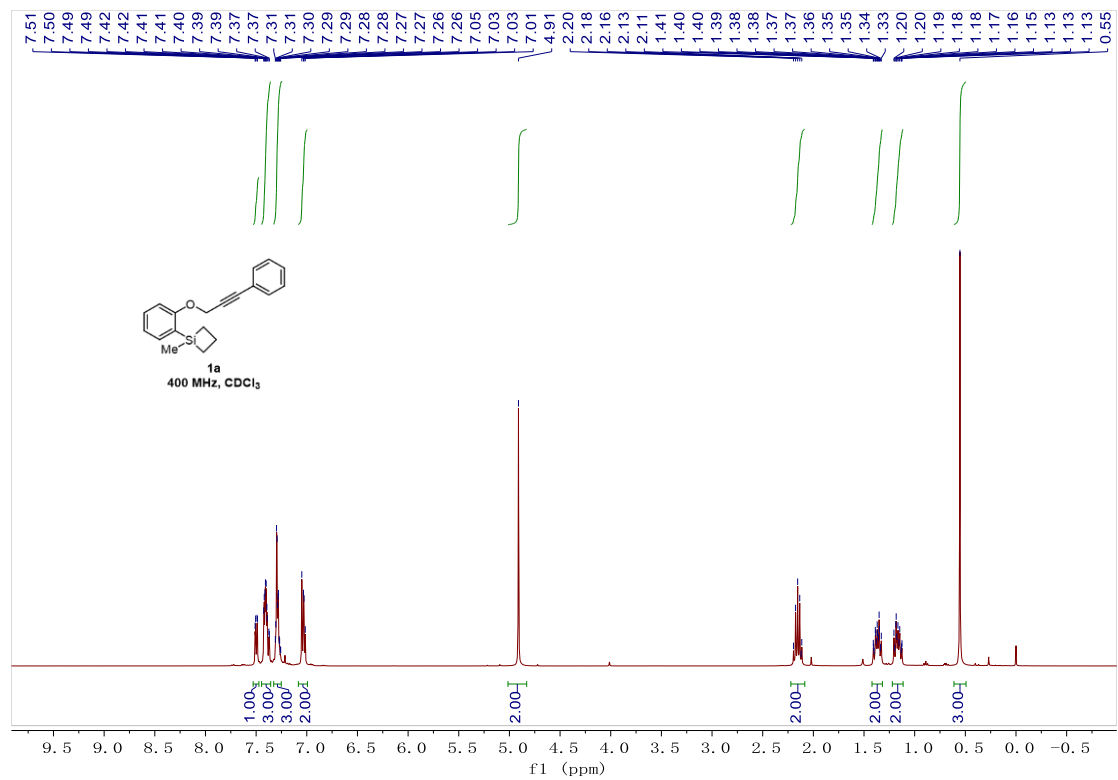

# <sup>13</sup>C NMR spectrum of 1a

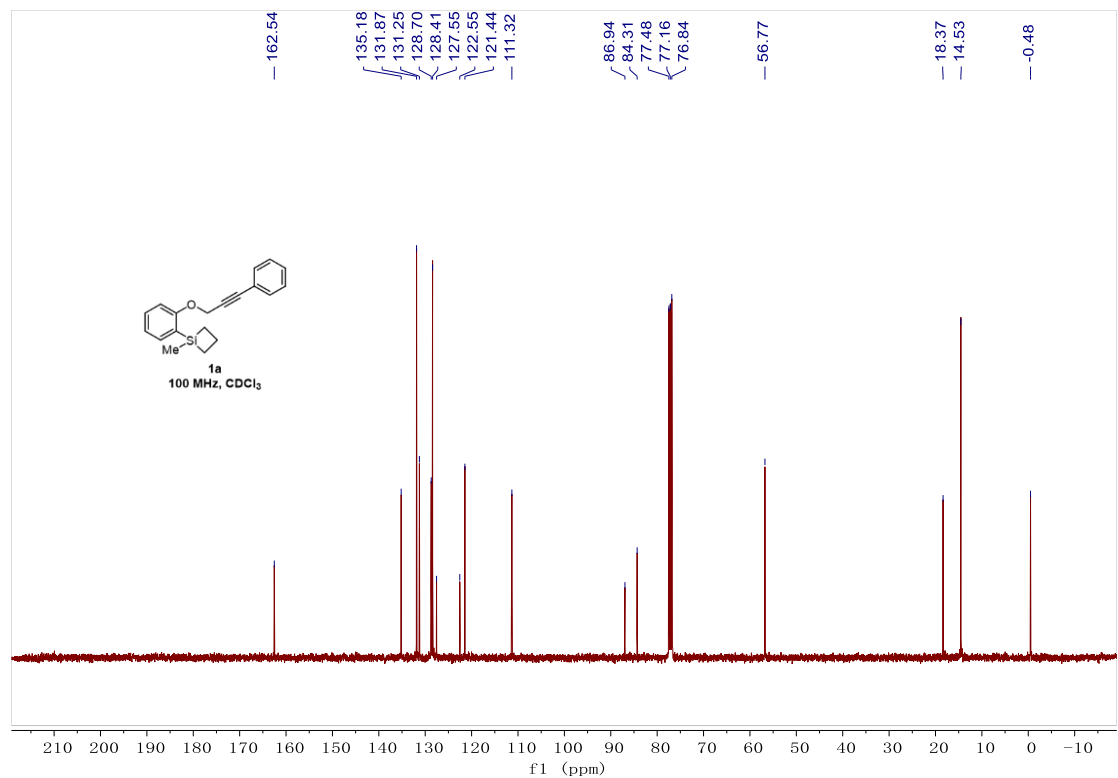

# <sup>1</sup>H NMR spectrum of 1b

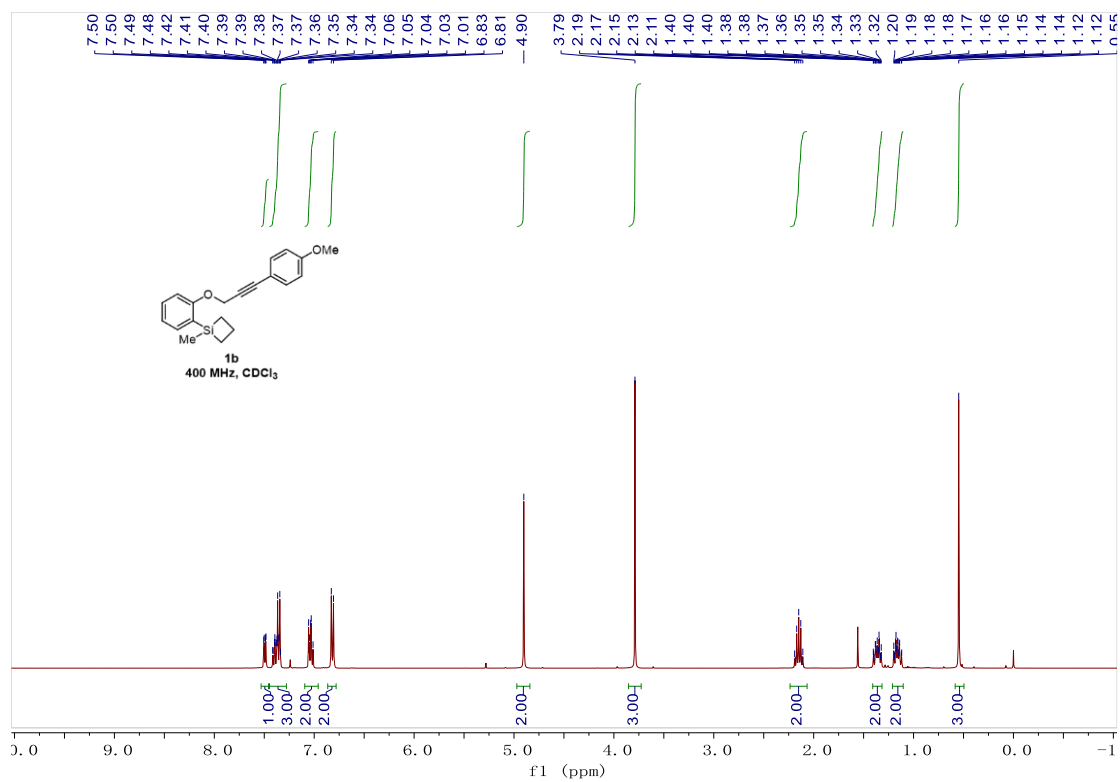

# <sup>13</sup>C NMR spectrum of 1b

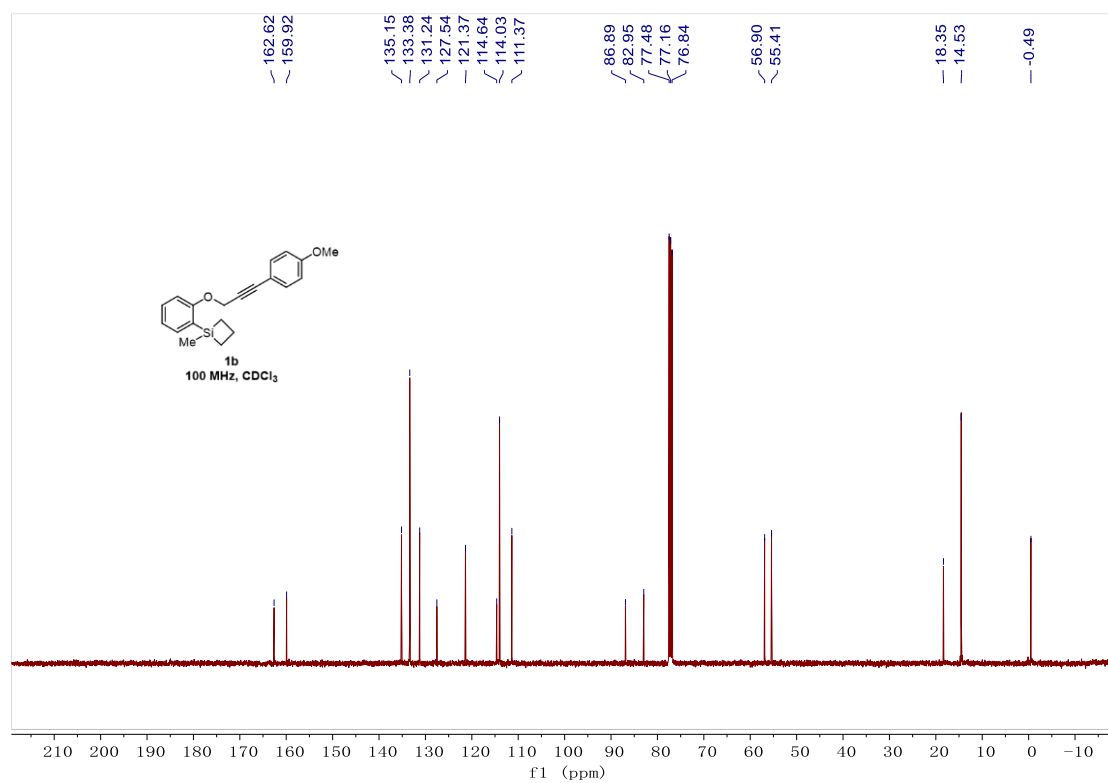

# <sup>1</sup>H NMR spectrum of 1c

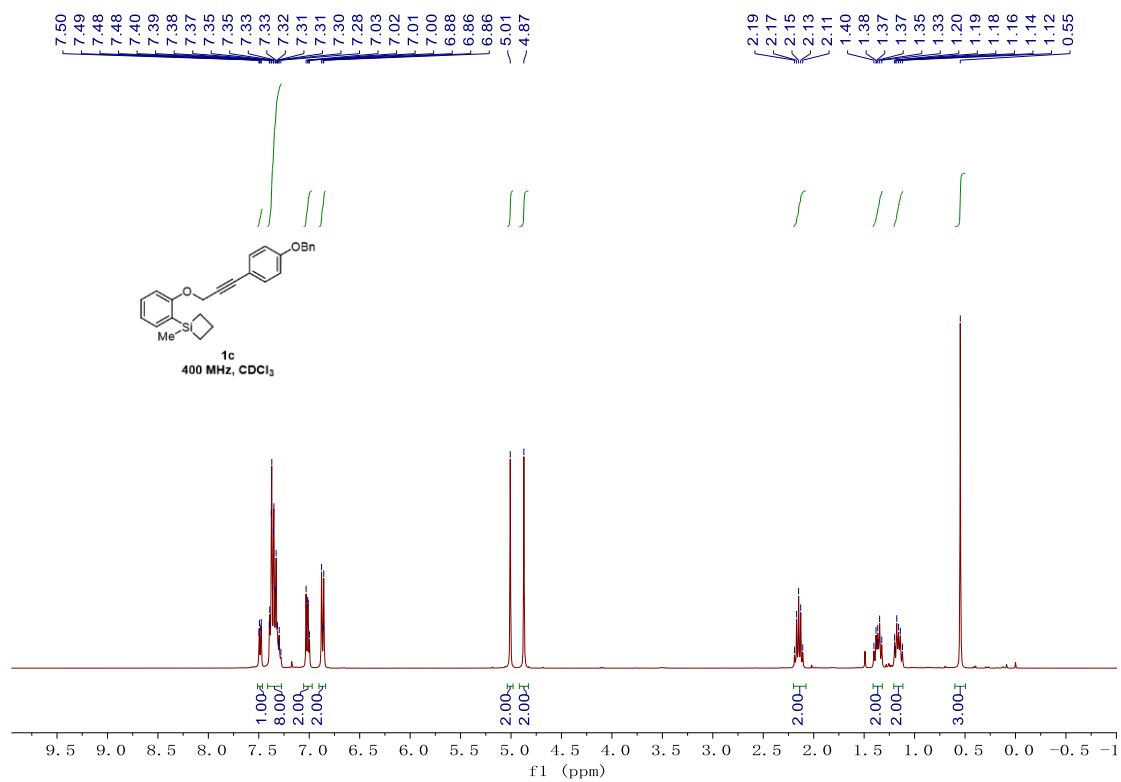

# <sup>13</sup>C NMR spectrum of 1c

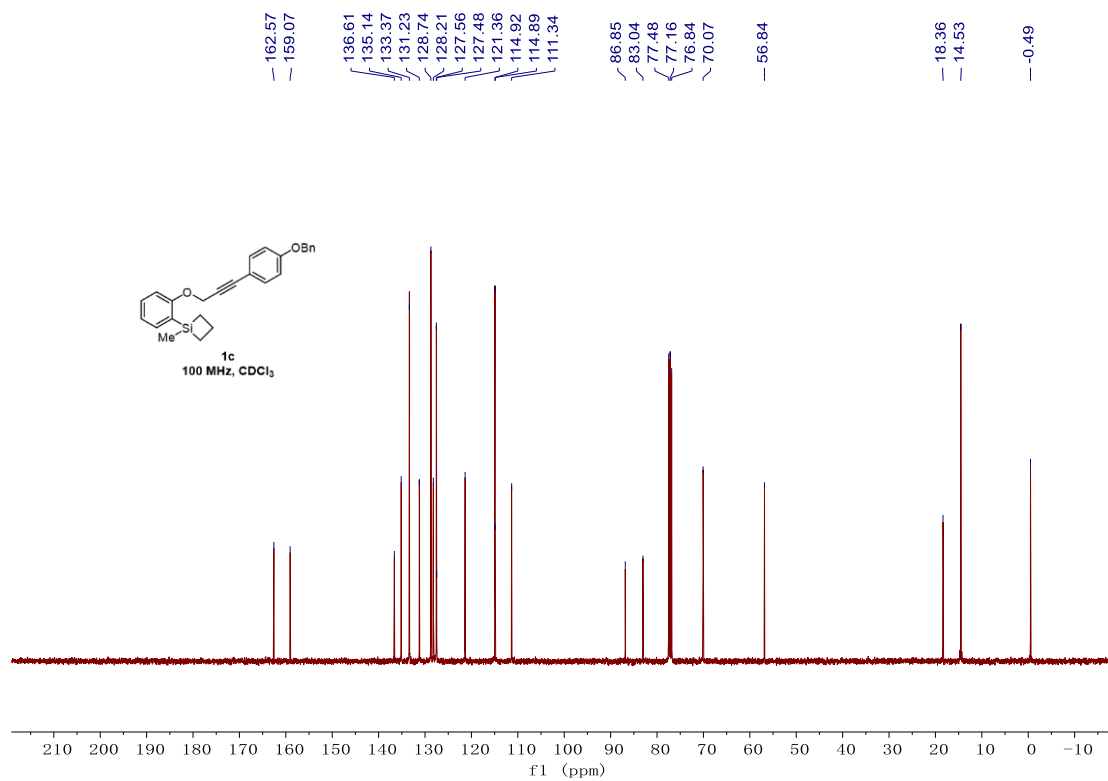



# <sup>1</sup>H NMR spectrum of 1d

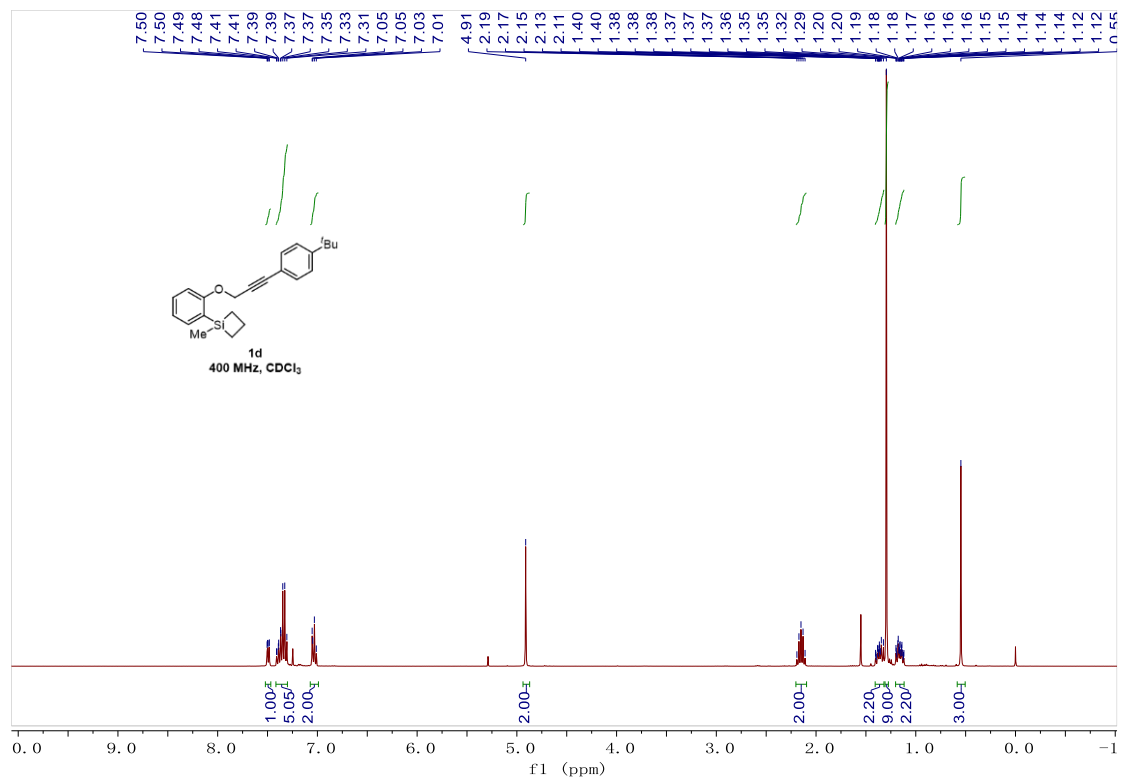

# <sup>13</sup>C NMR spectrum of 1d

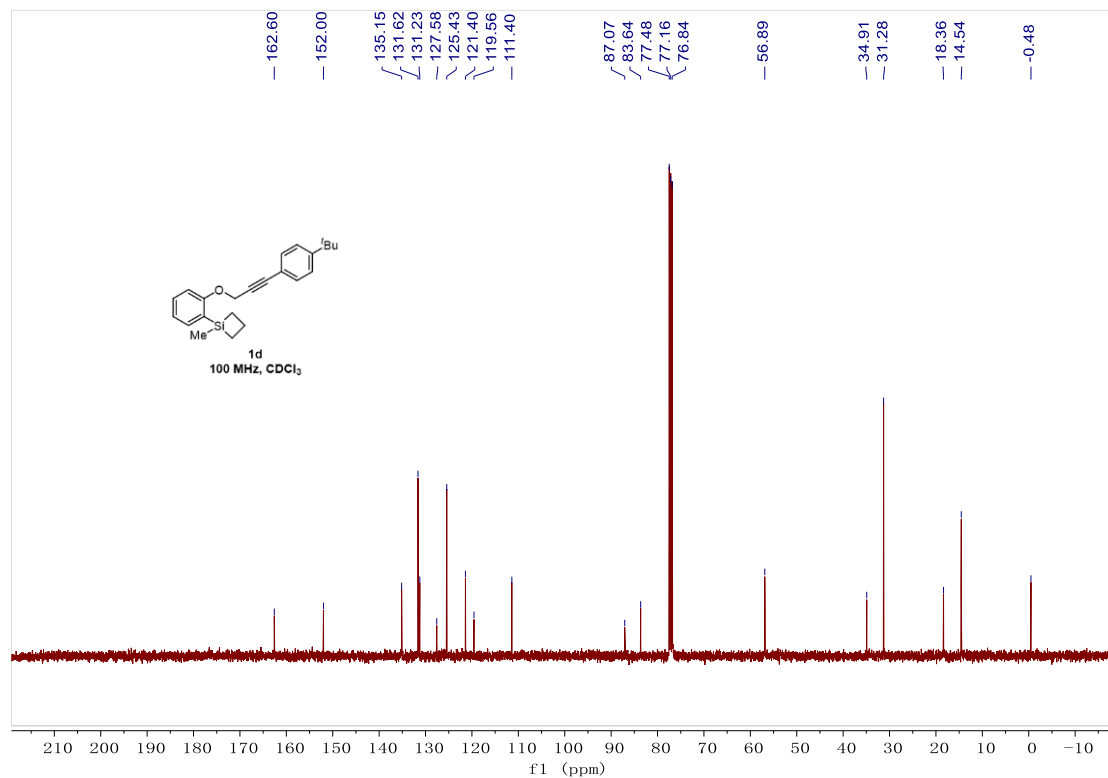

# <sup>1</sup>H NMR spectrum of 1e

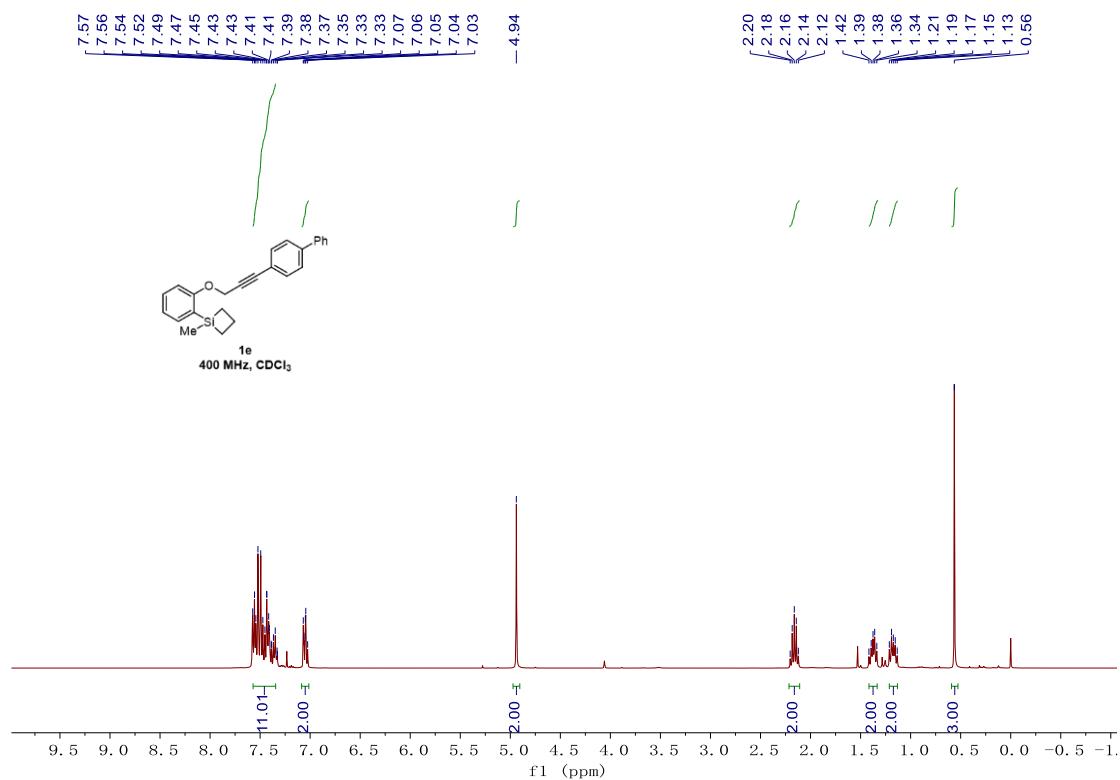

# <sup>13</sup>C NMR spectrum of 1e

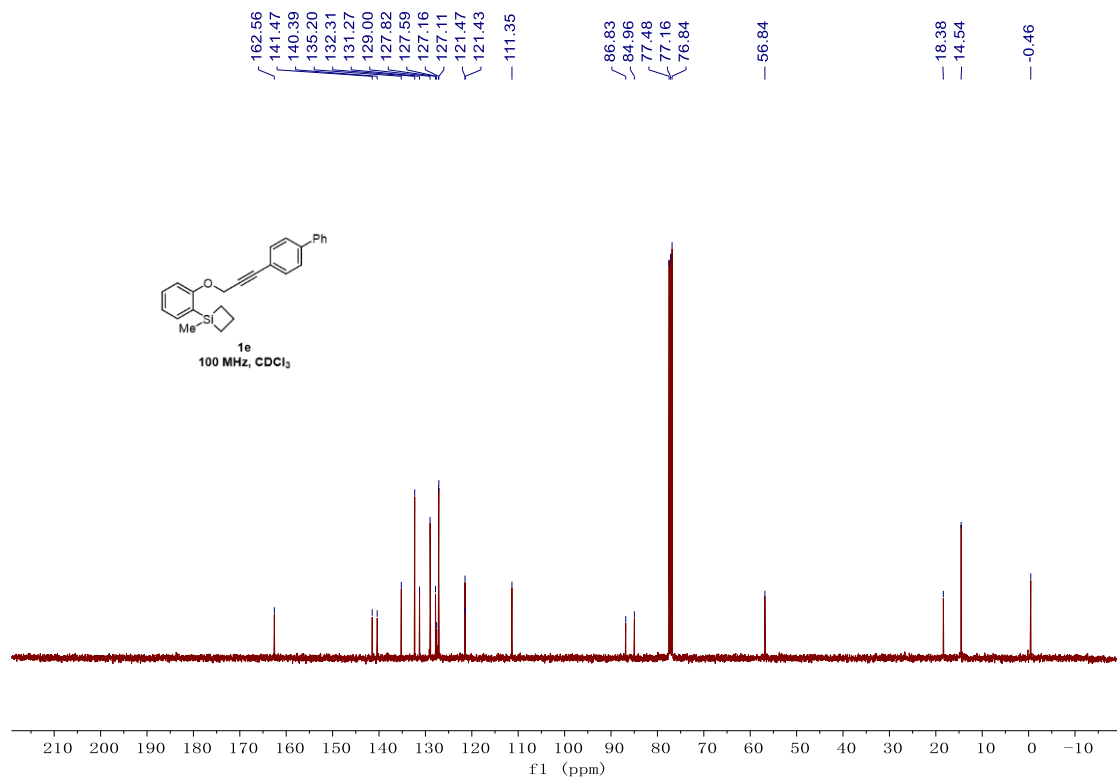

# <sup>1</sup>H NMR spectrum of 1f

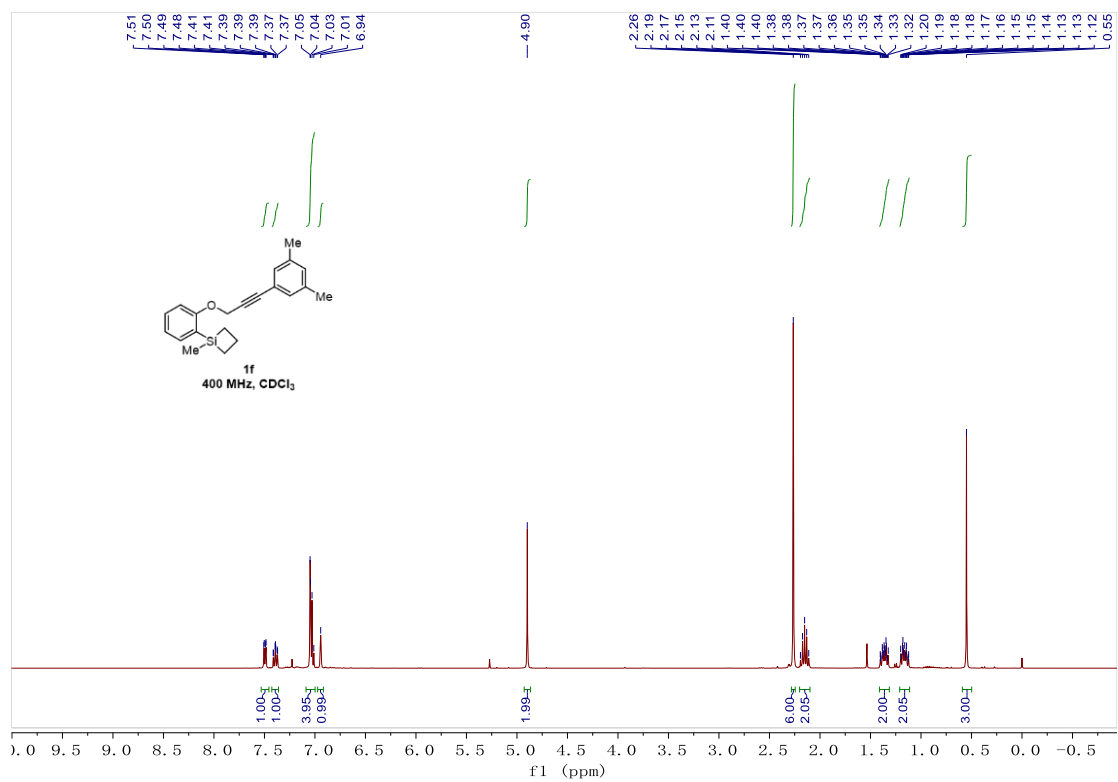

# <sup>13</sup>C NMR spectrum of 1f

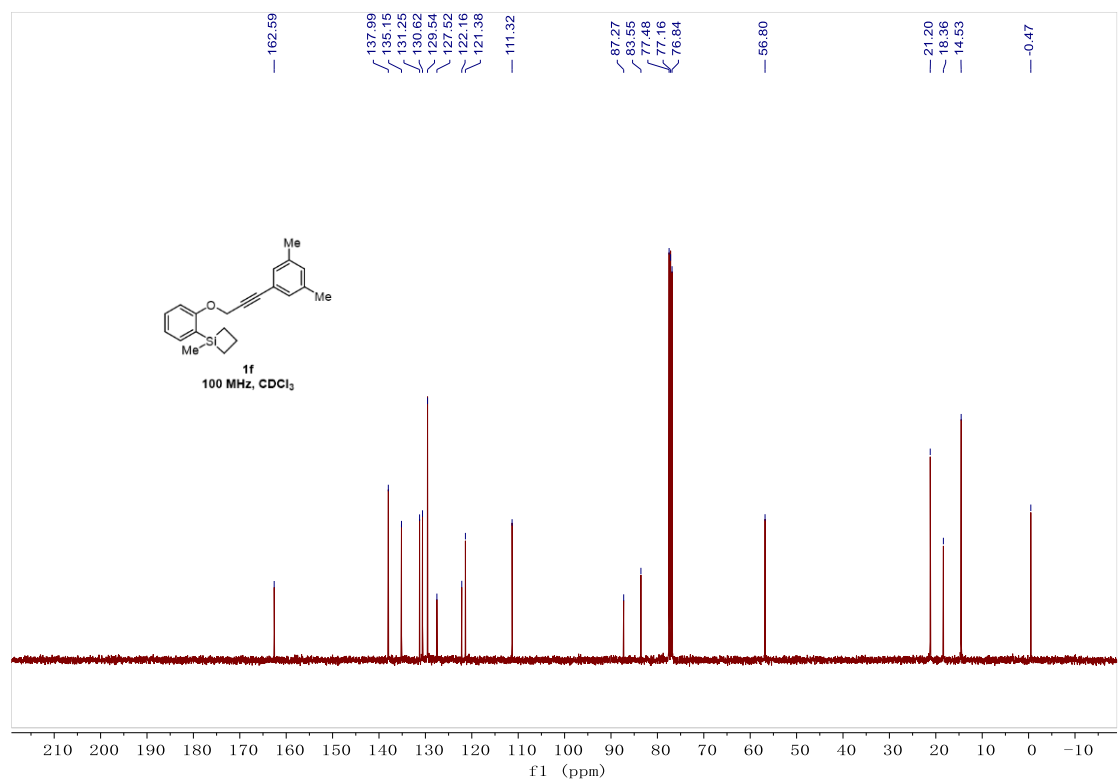

# <sup>1</sup>H NMR spectrum of 1g

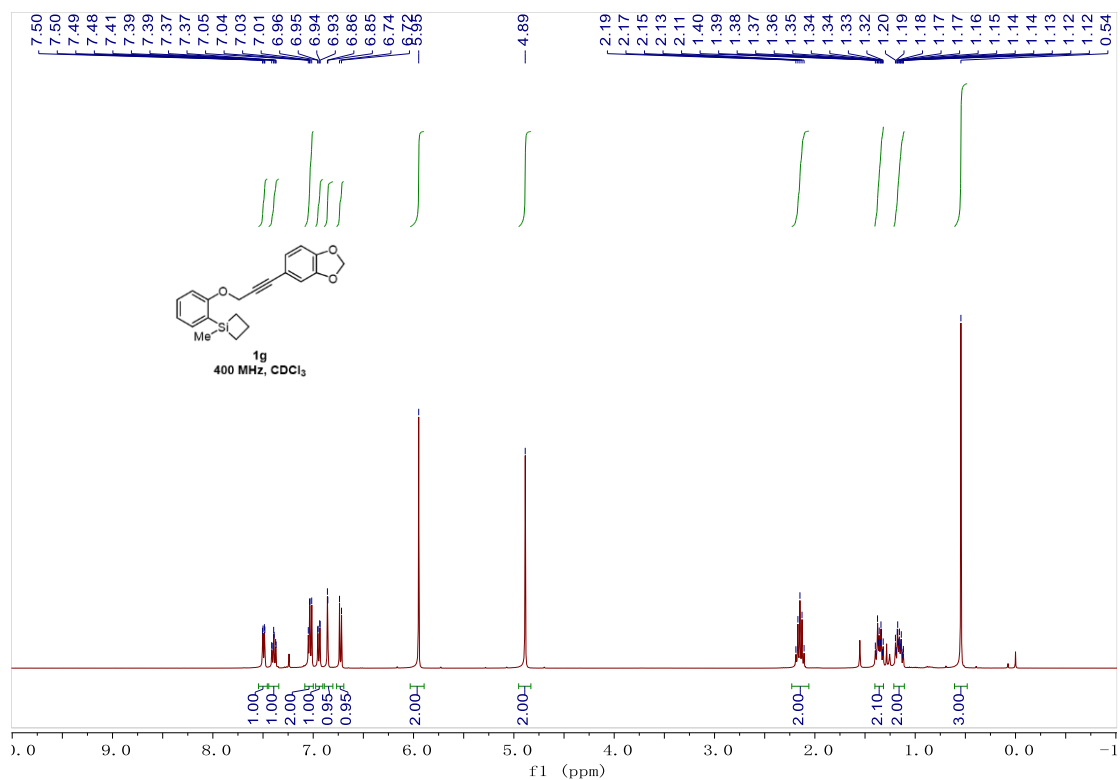

# <sup>13</sup>C NMR spectrum of 1g

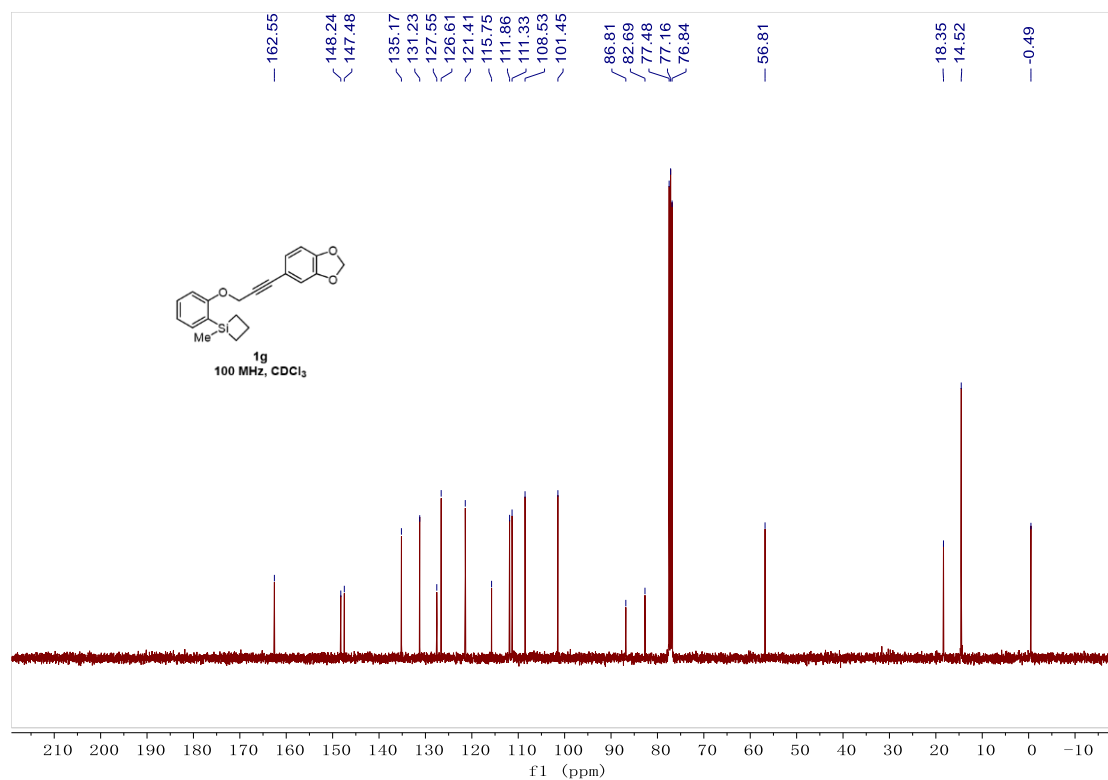

# <sup>1</sup>H NMR spectrum of 1h

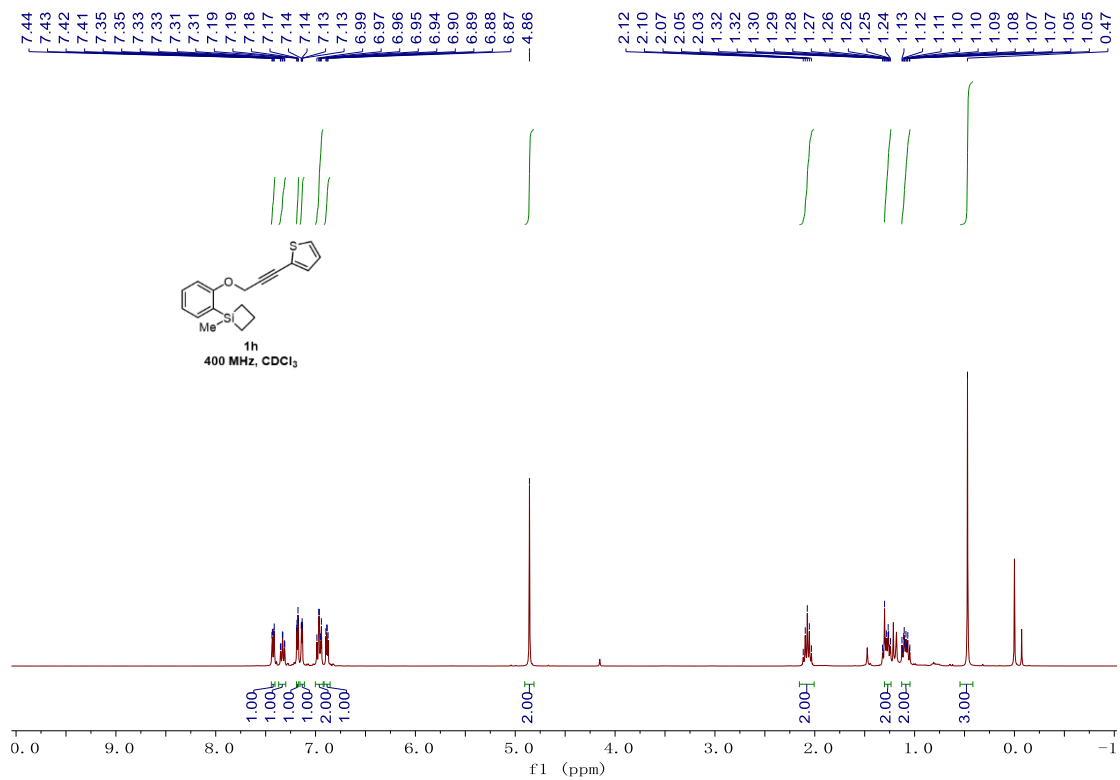

# <sup>13</sup>C NMR spectrum of 1h

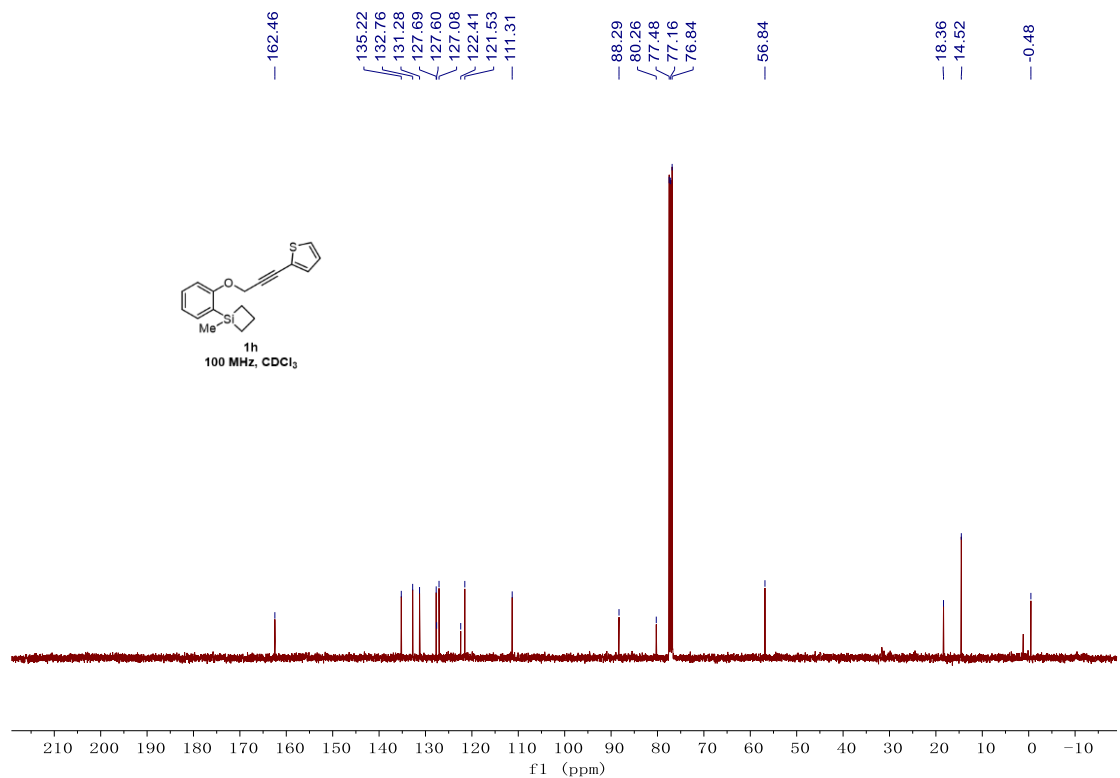

# <sup>1</sup>H NMR spectrum of 1i

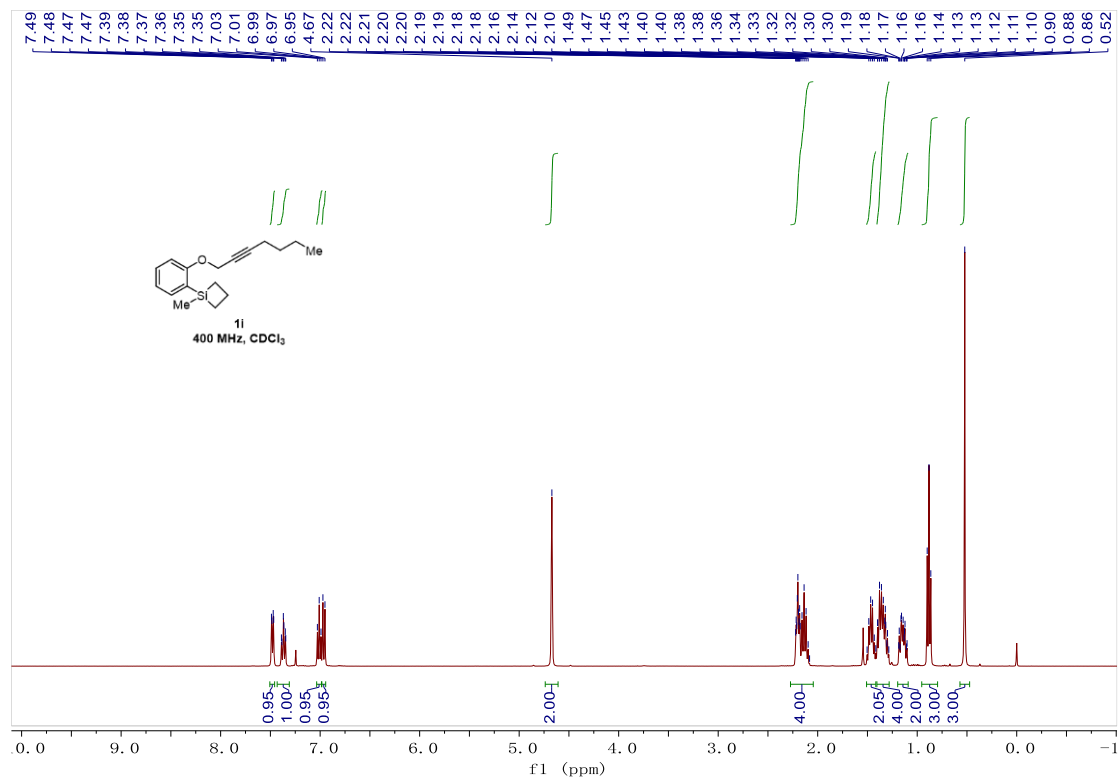

# <sup>13</sup>C NMR spectrum of 1i

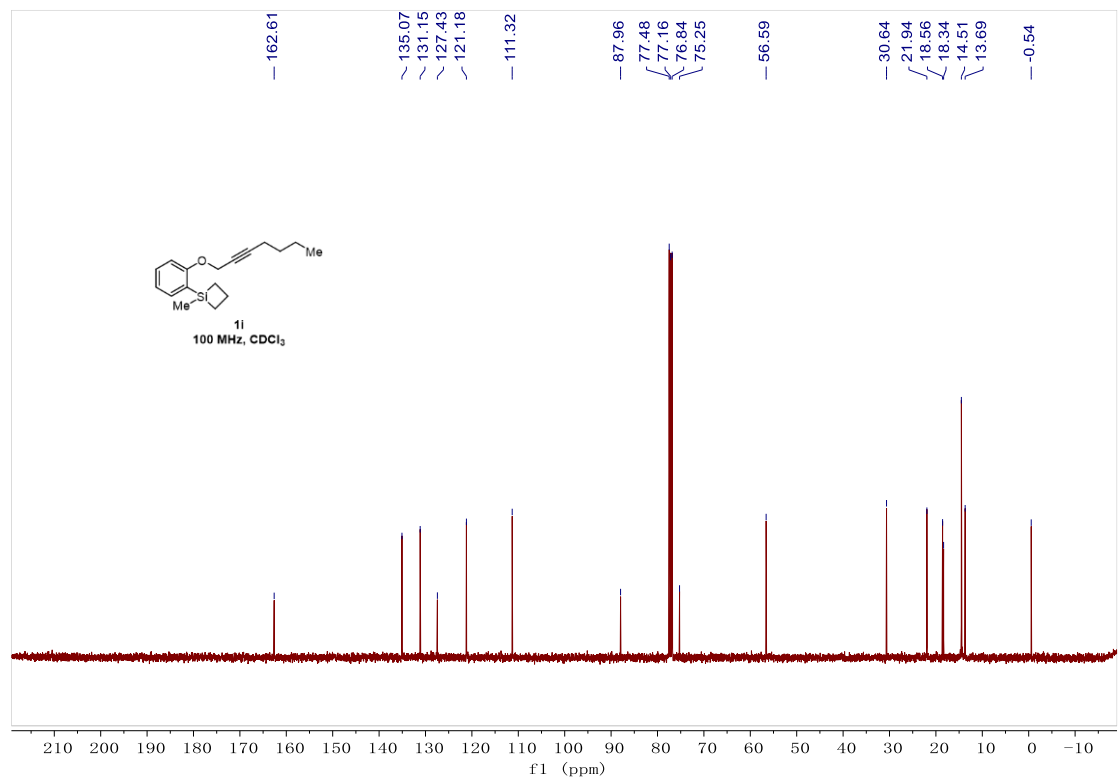

# <sup>1</sup>H NMR spectrum of 1j

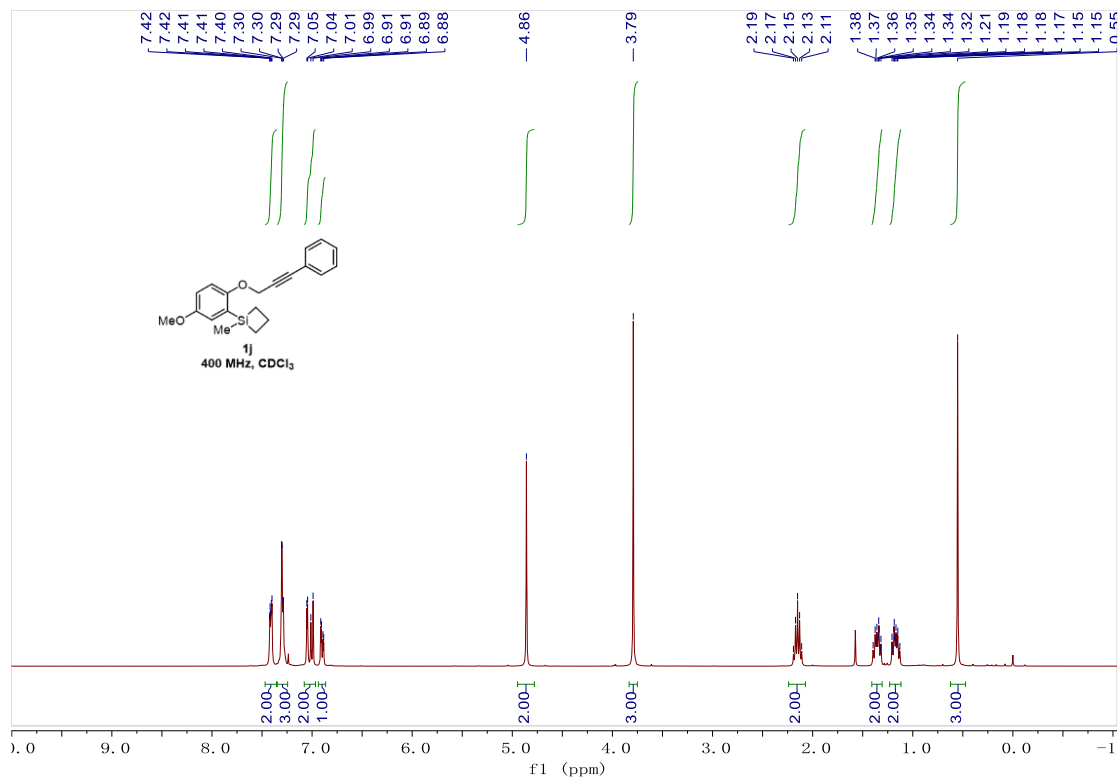

# <sup>13</sup>C NMR spectrum of 1j

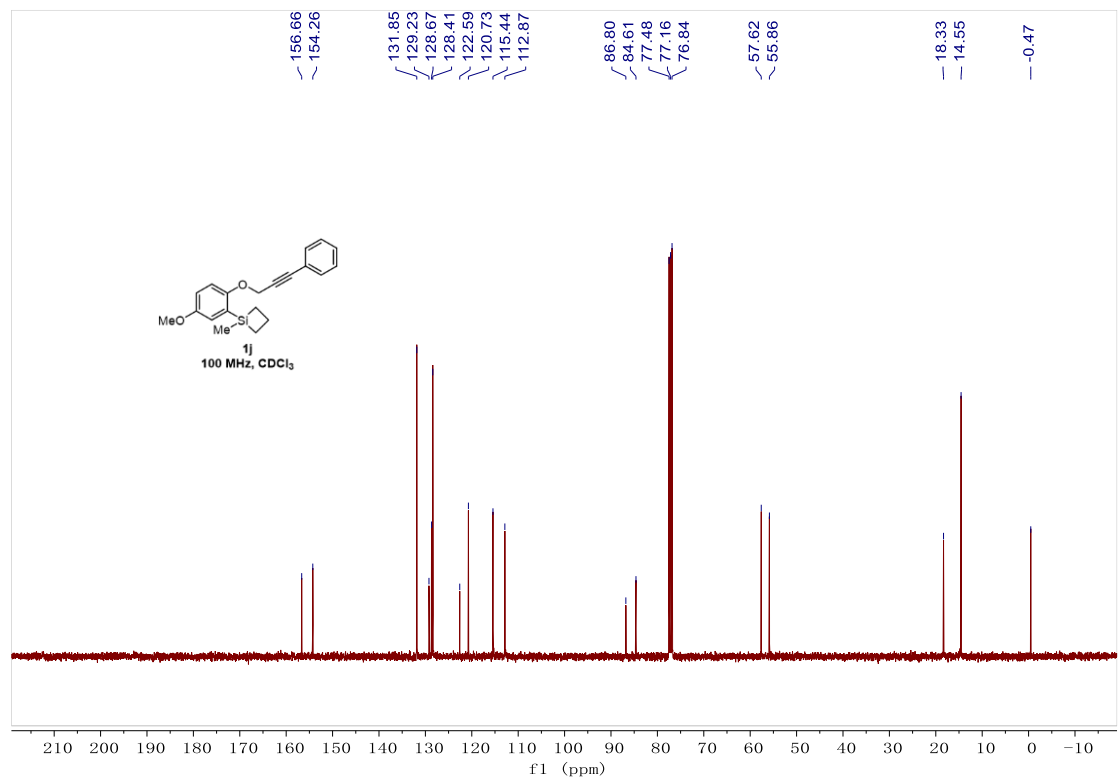

### <sup>1</sup>H NMR spectrum of 1k

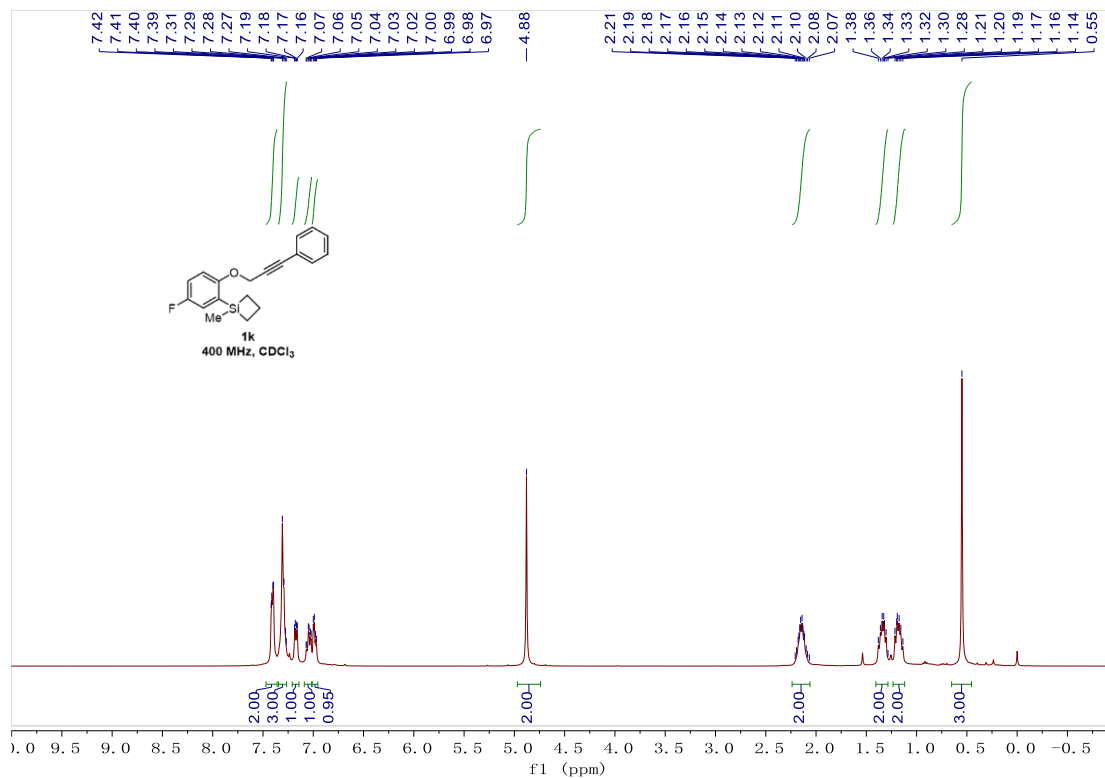

### <sup>13</sup>C NMR spectrum of 1k

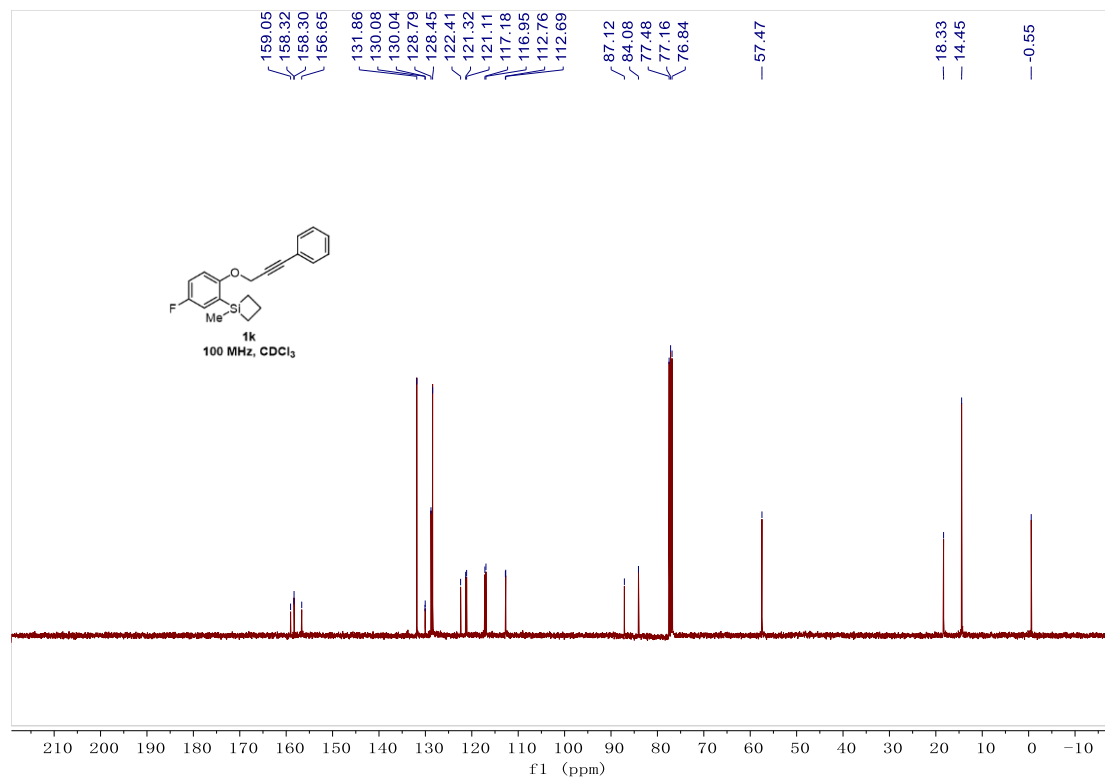



# <sup>19</sup>F NMR spectrum of 1k

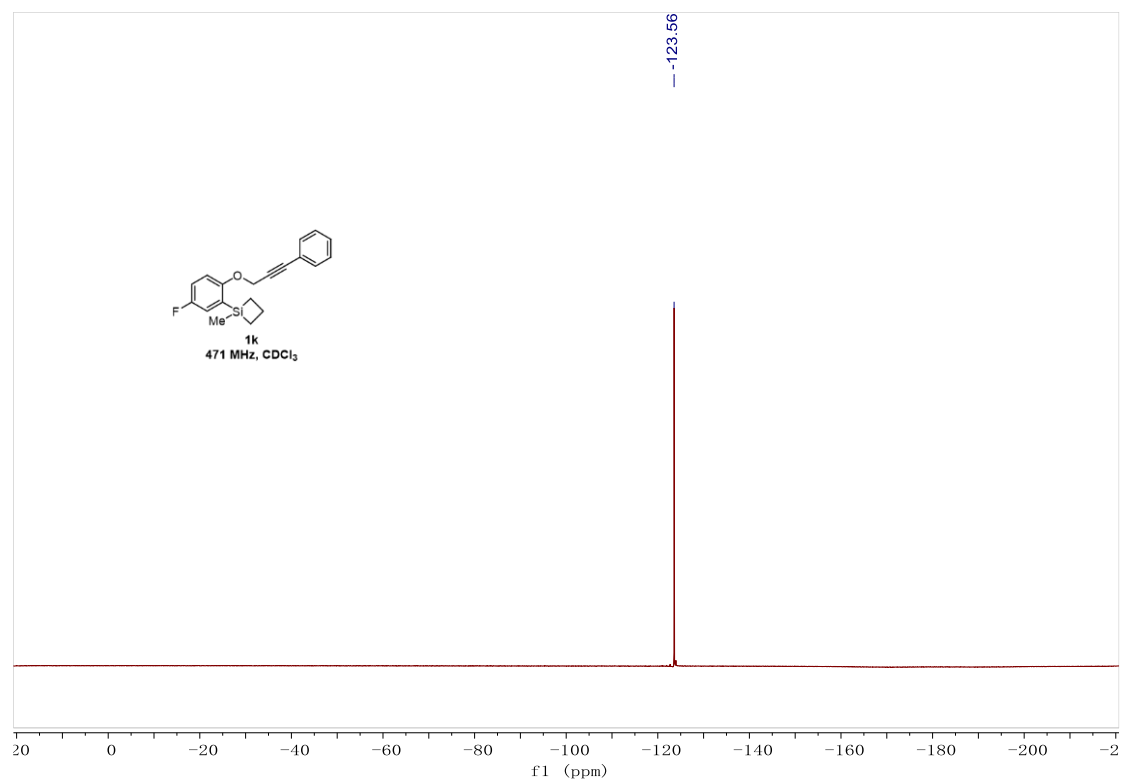

# <sup>1</sup>H NMR spectrum of 11

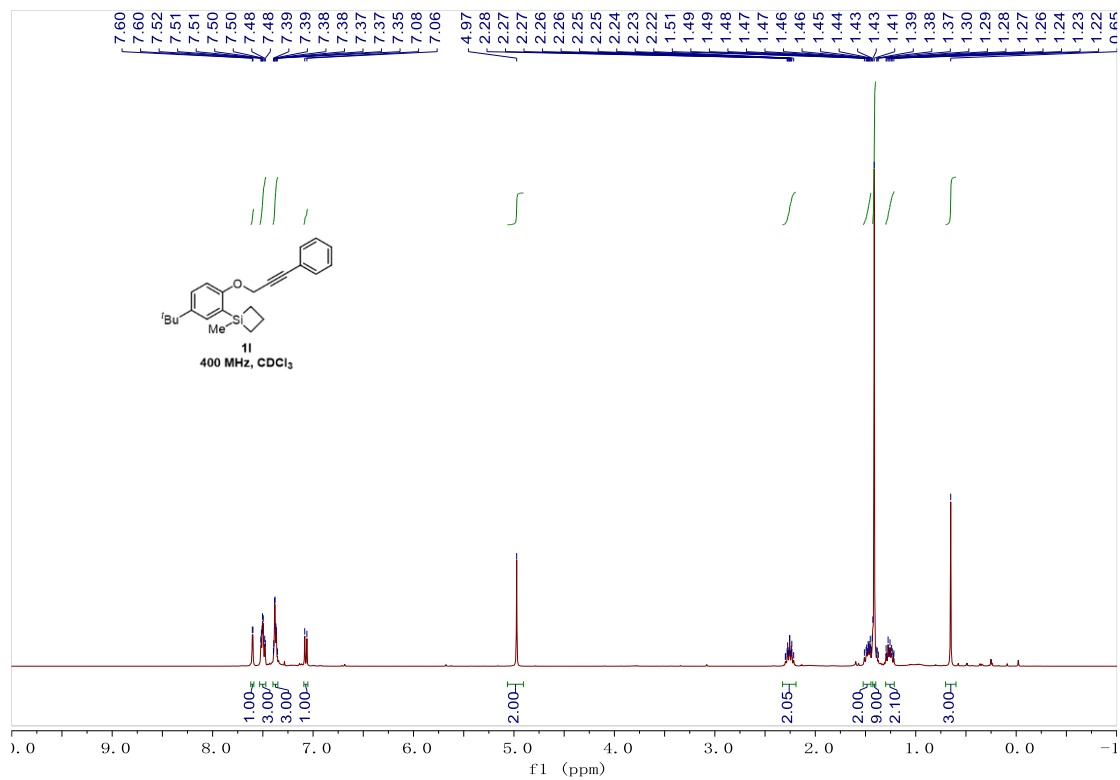

# <sup>13</sup>C NMR spectrum of 11

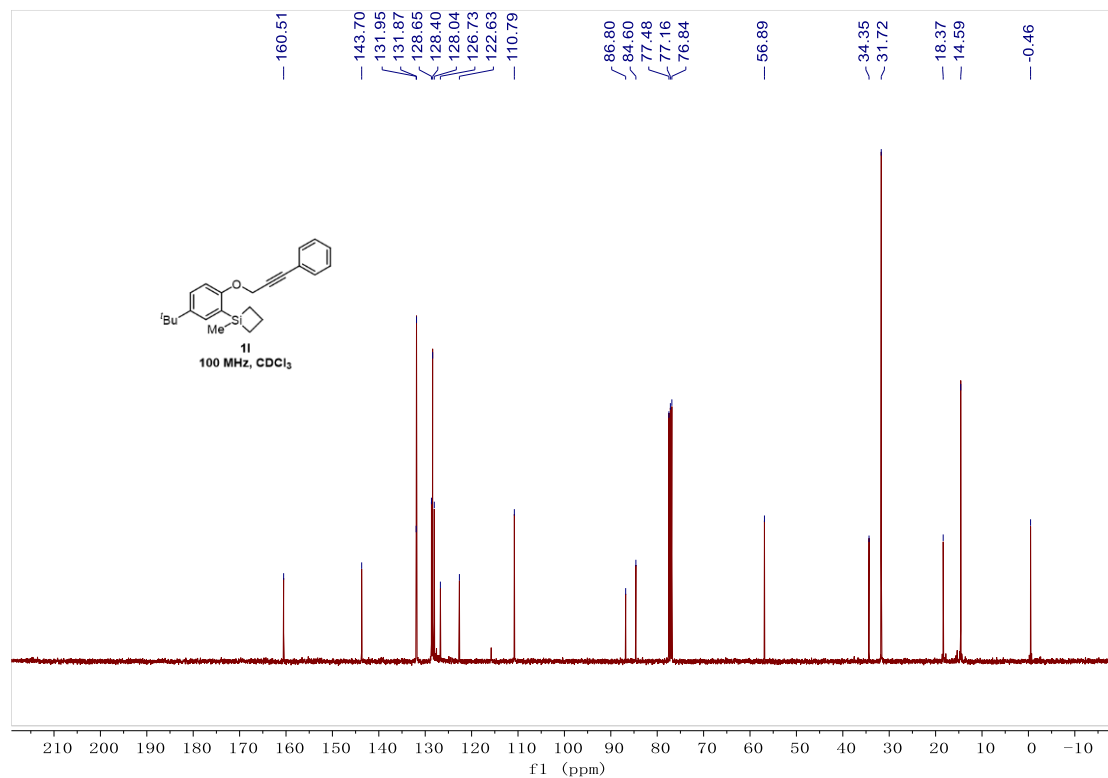

# <sup>1</sup>H NMR spectrum of 1m

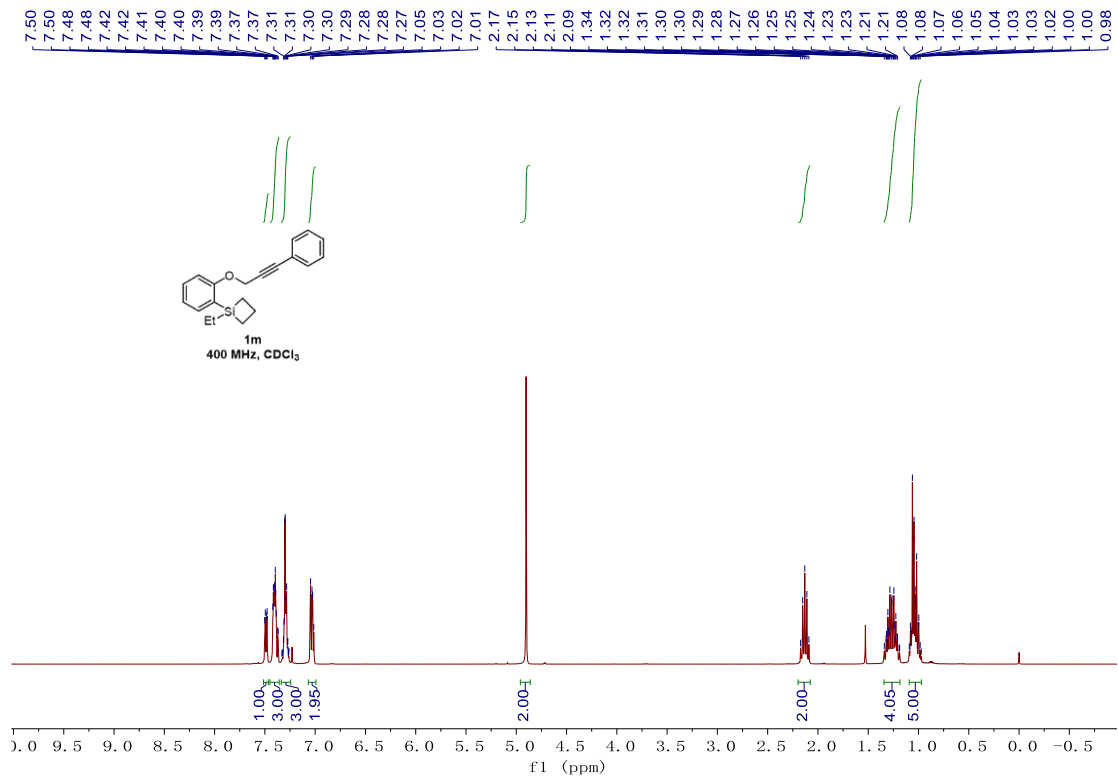

# <sup>13</sup>C NMR spectrum of 1m

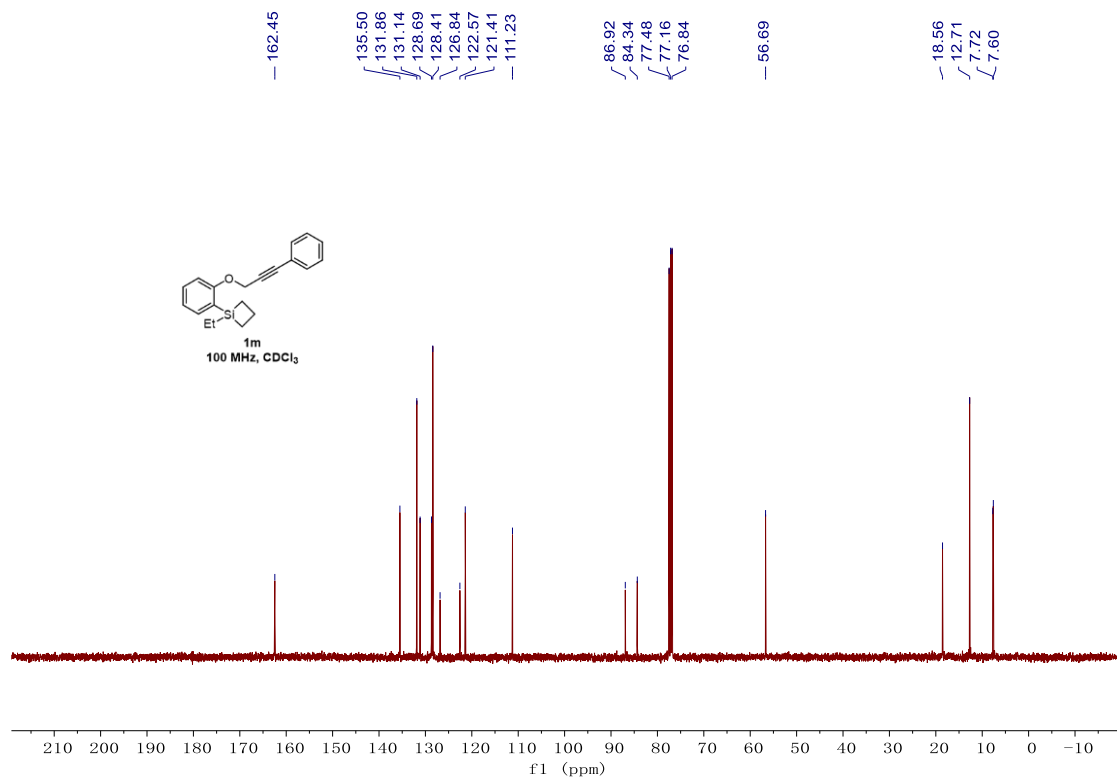

# <sup>1</sup>H NMR spectrum of 1n

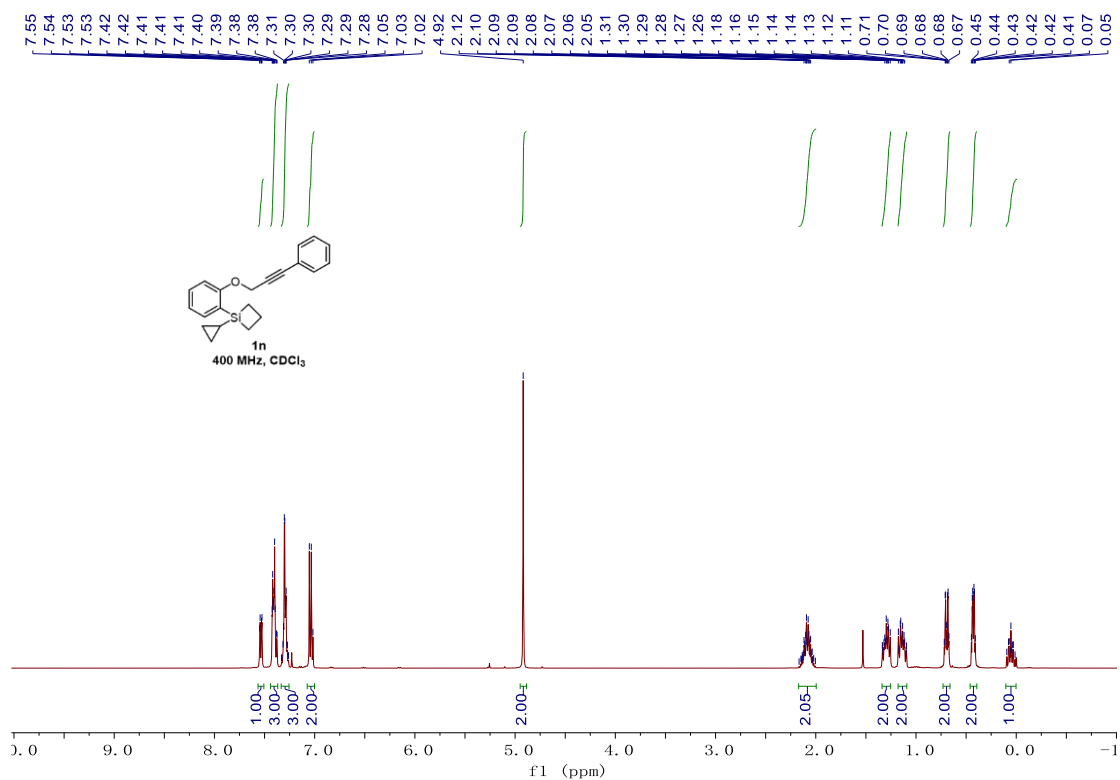

# <sup>13</sup>C NMR spectrum of 1n

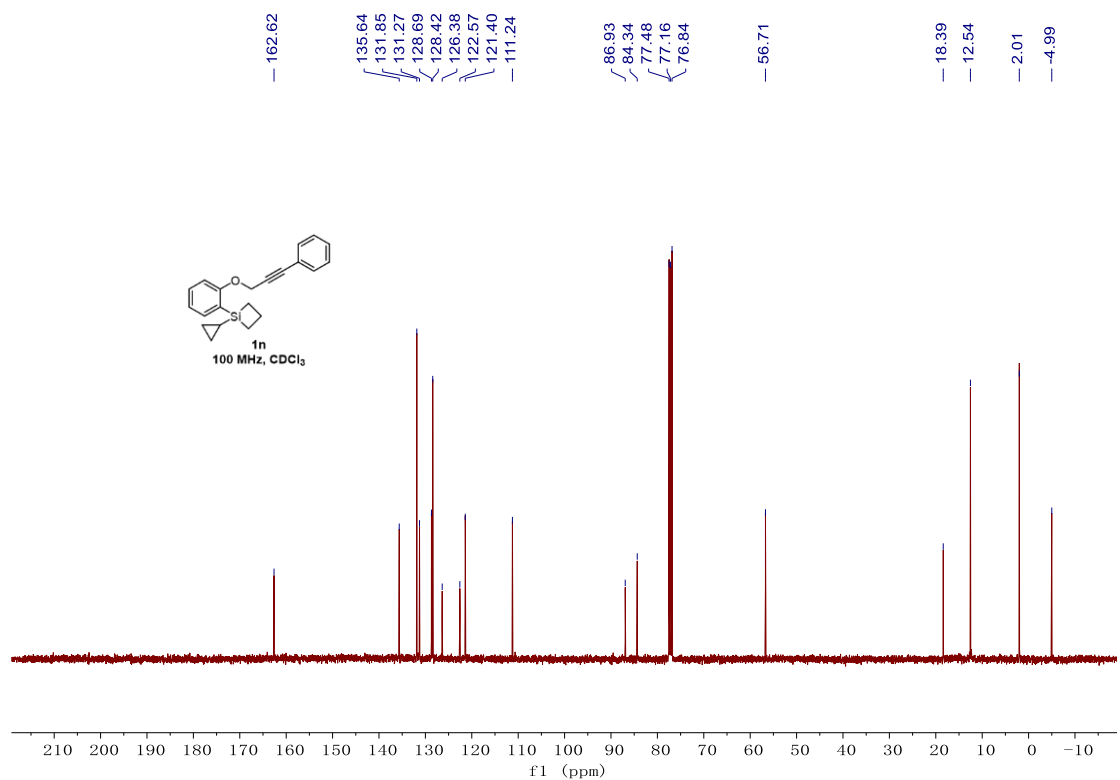

# <sup>1</sup>H NMR spectrum of 1o

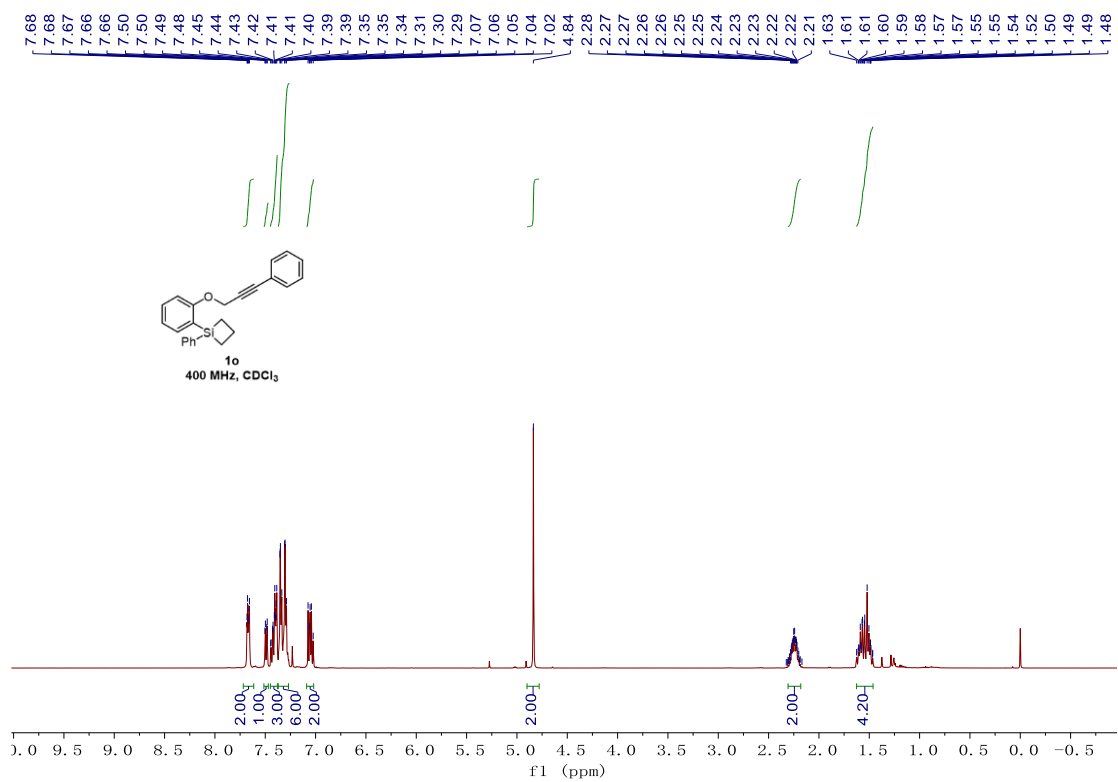

# <sup>13</sup>C NMR spectrum of 1o

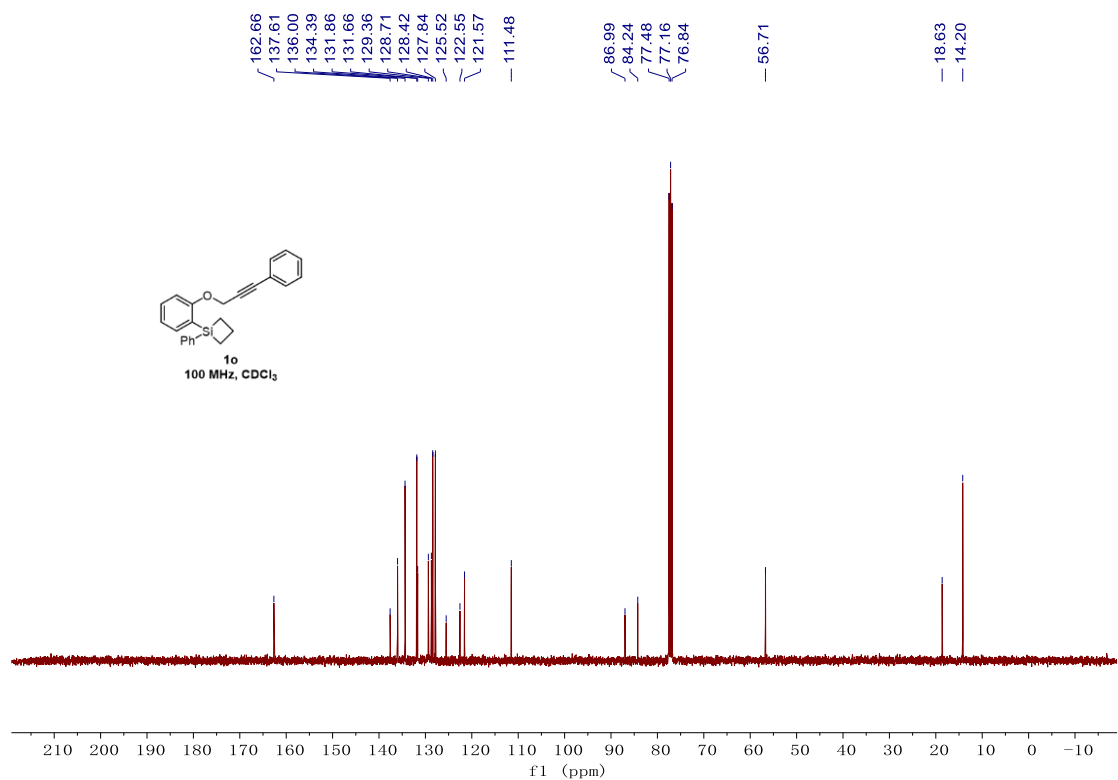

# <sup>1</sup>H NMR spectrum of 3a

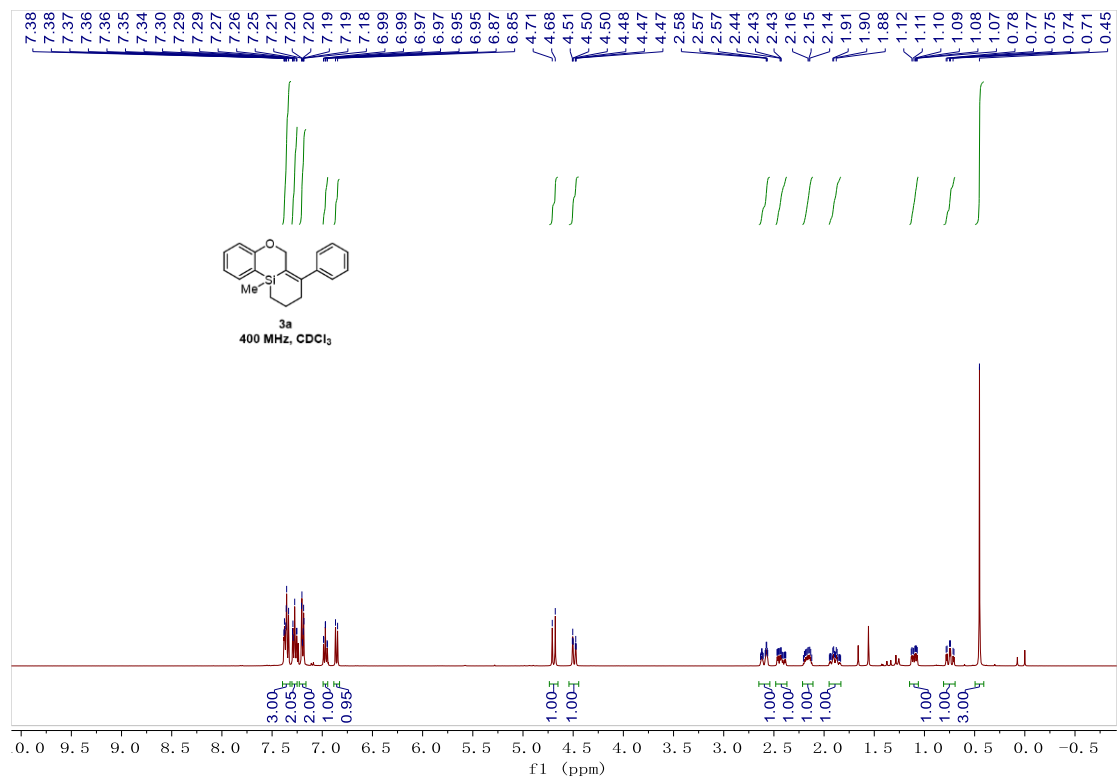

# <sup>13</sup>C NMR spectrum of 3a

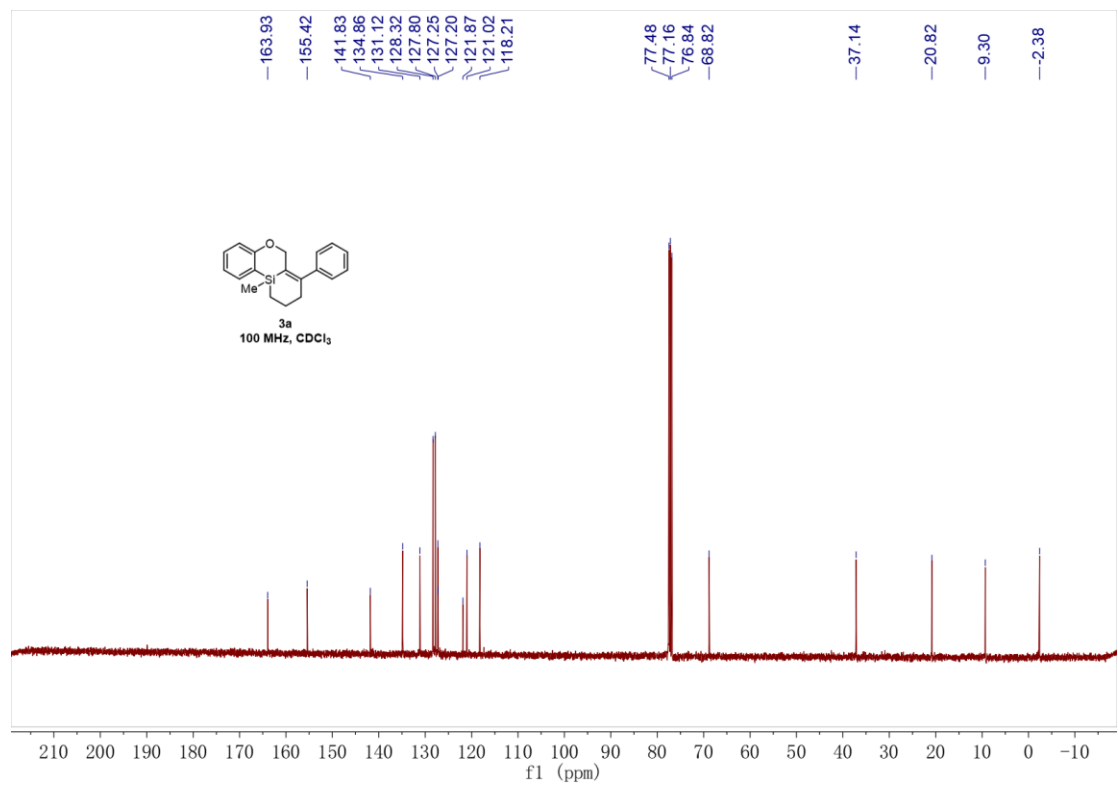

## <sup>1</sup>H NMR spectrum of 3b

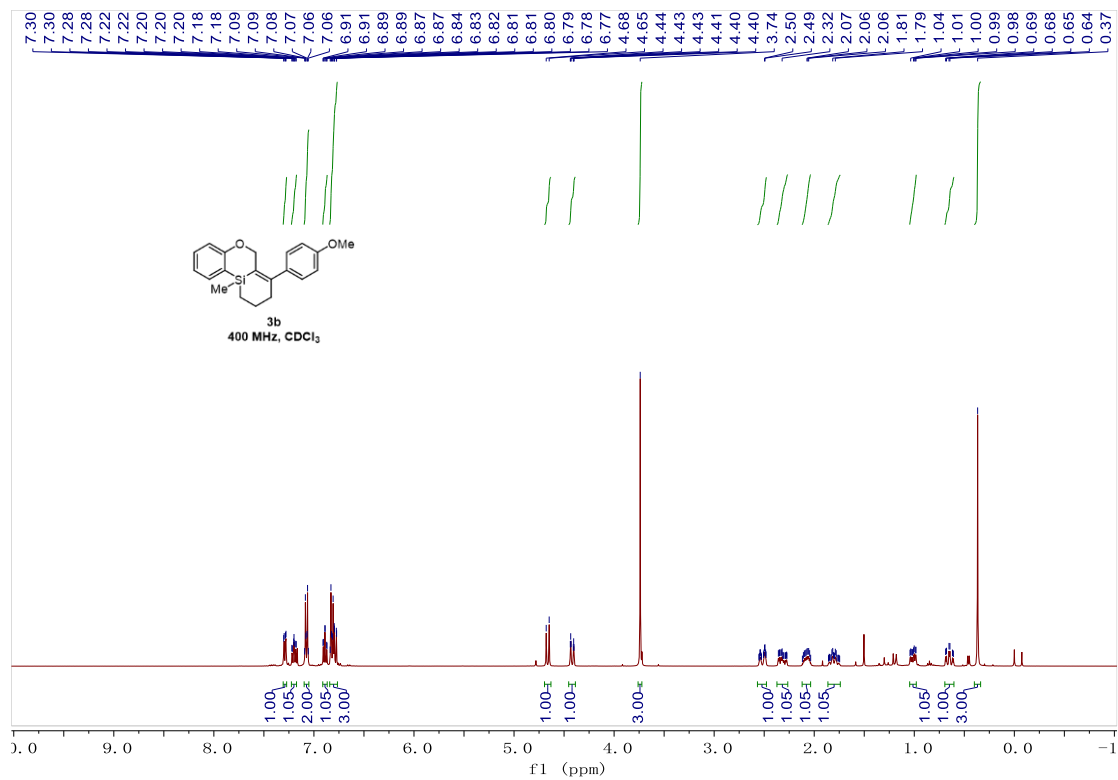

## <sup>13</sup>C NMR spectrum of 3b

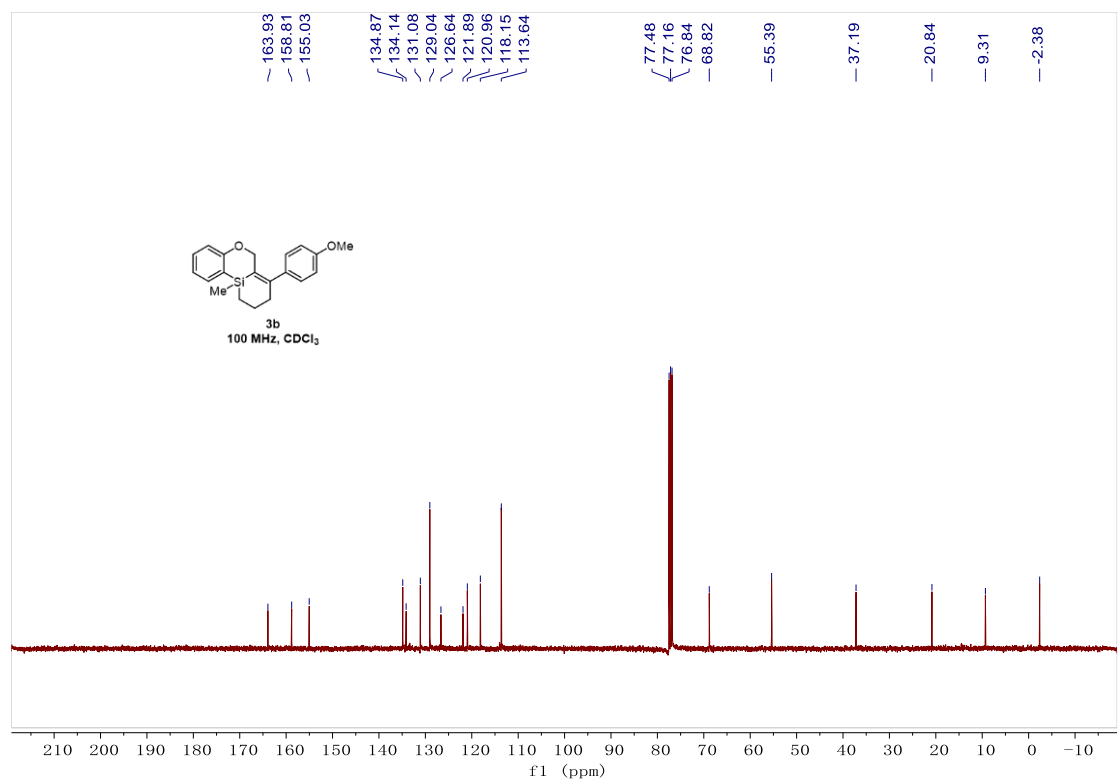





# <sup>1</sup>H NMR spectrum of 3c

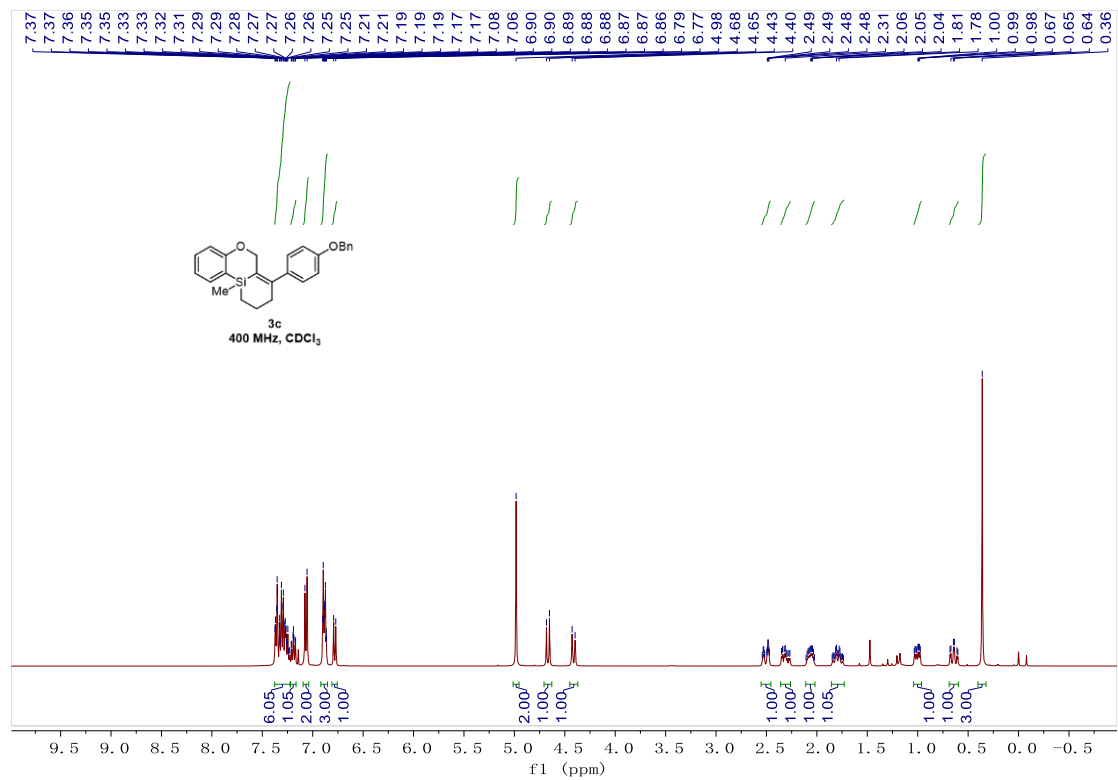

# <sup>13</sup>C NMR spectrum of 3c

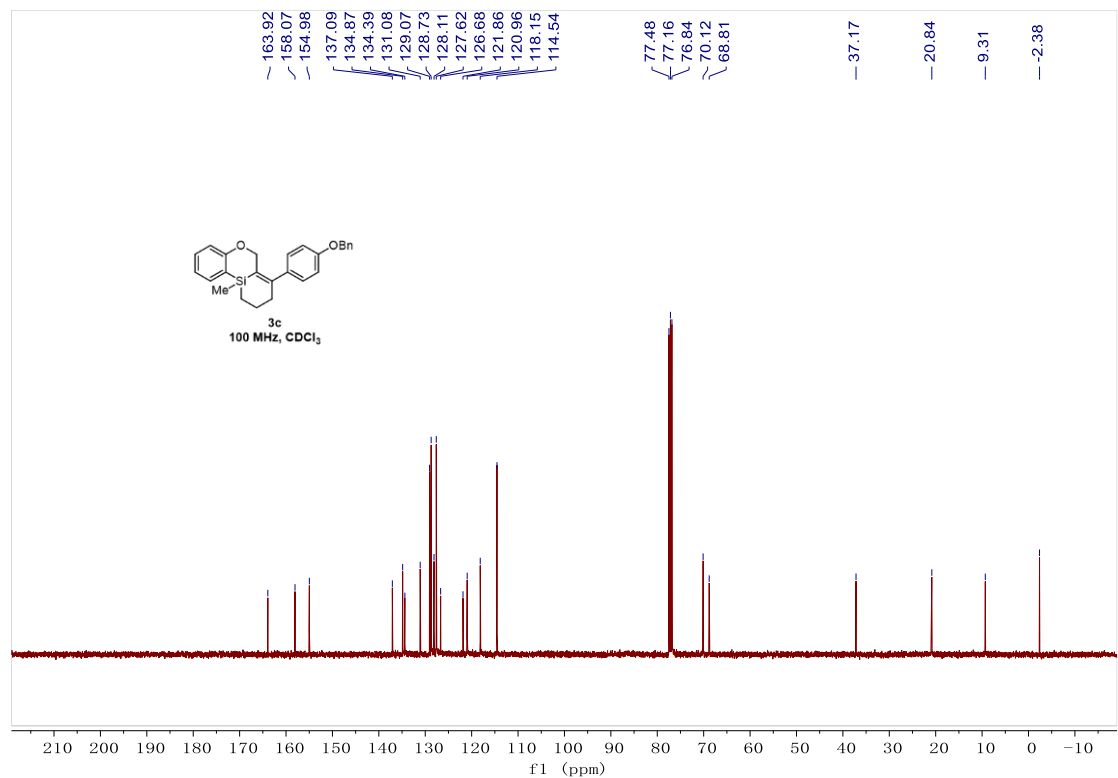

## <sup>1</sup>H NMR spectrum of 3d

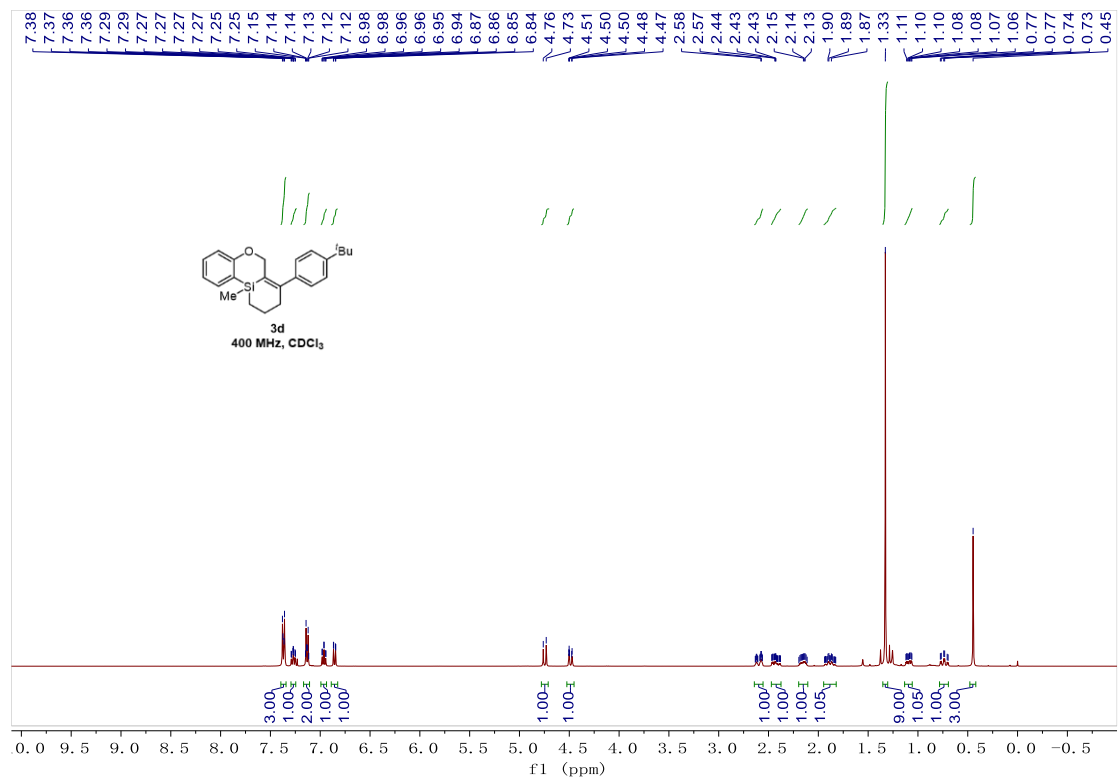

## <sup>13</sup>C NMR spectrum of 3d

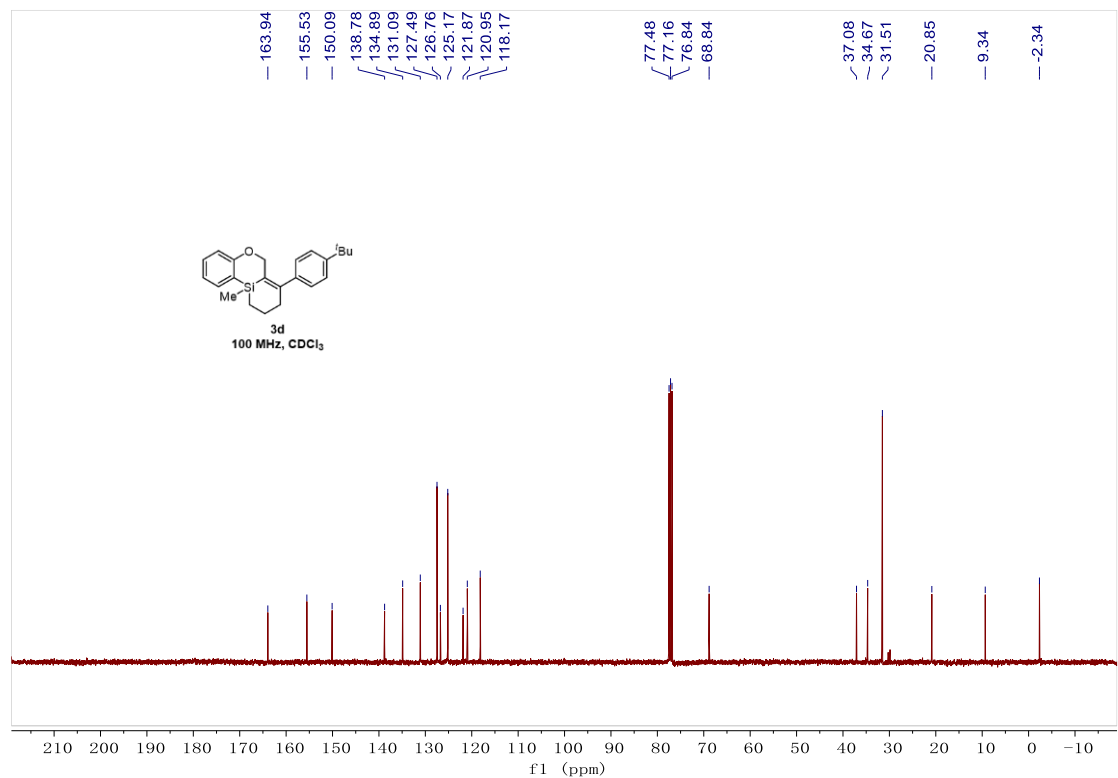

# <sup>1</sup>H NMR spectrum of 3e

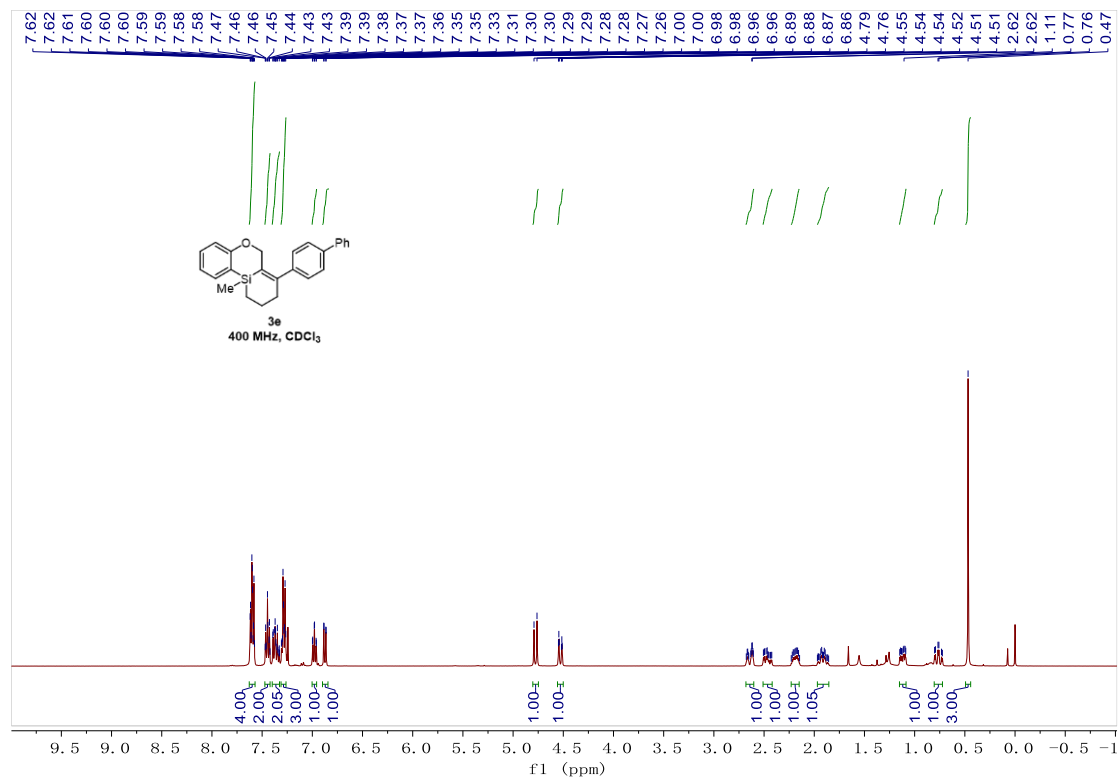

# <sup>13</sup>C NMR spectrum of 3e

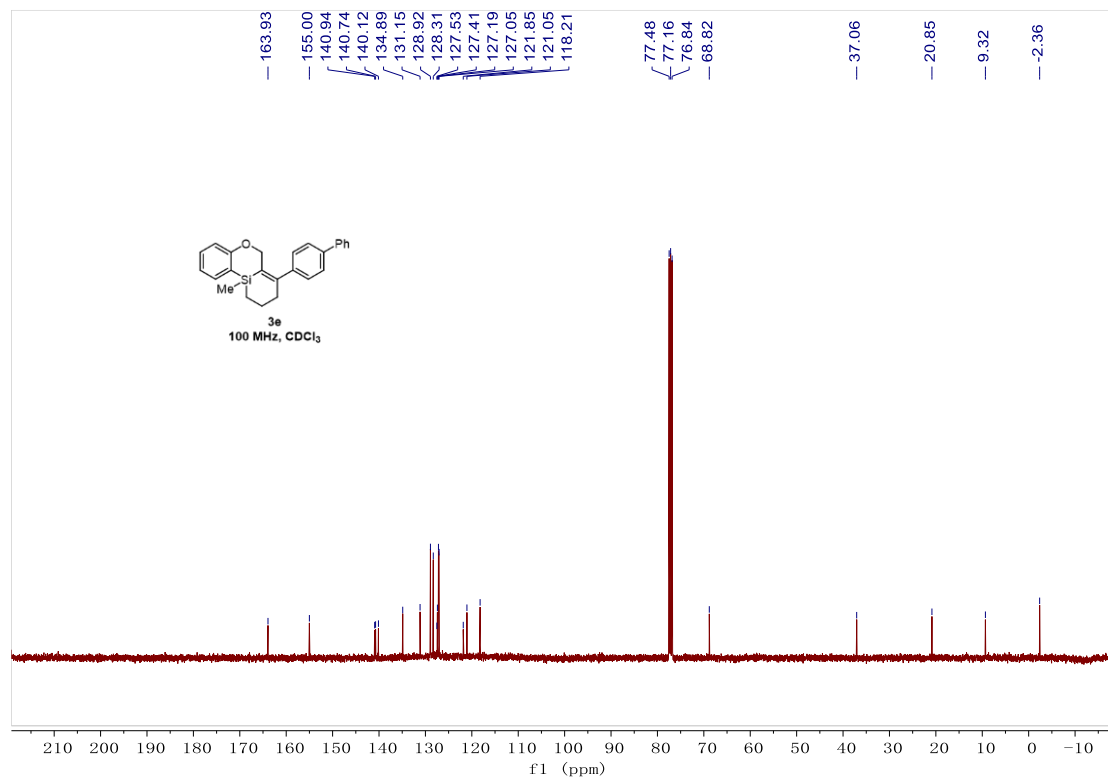

# <sup>1</sup>H NMR spectrum of 3f

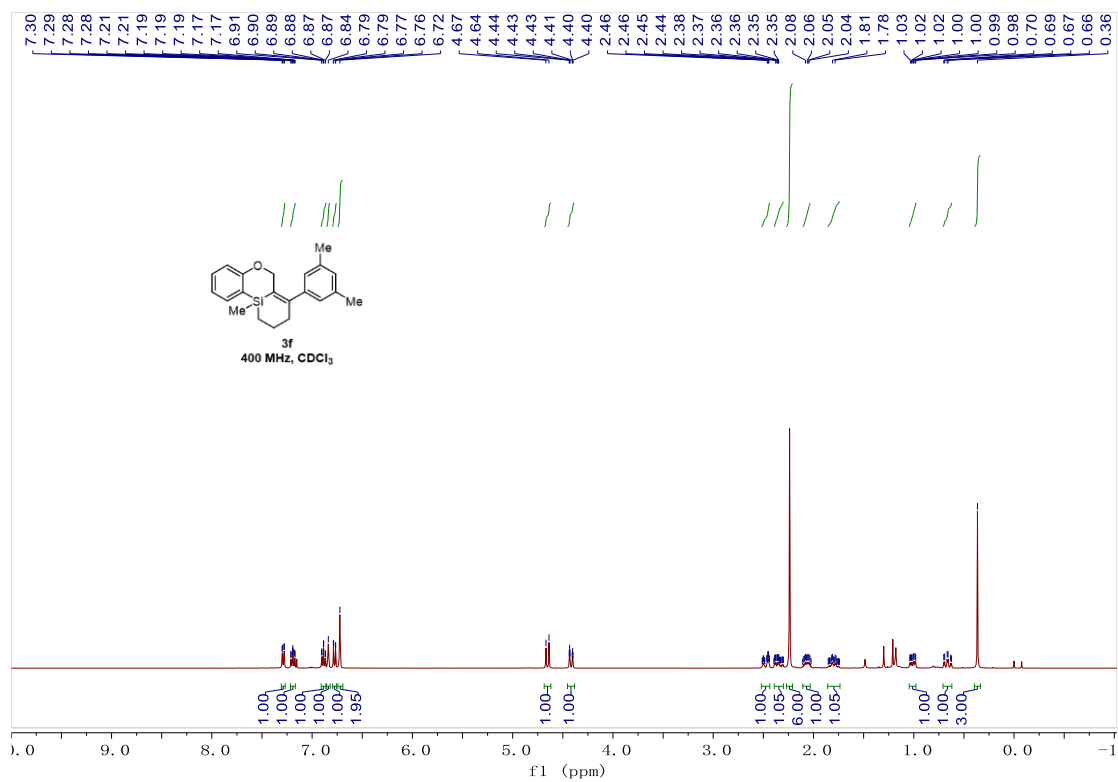

# <sup>13</sup>C NMR spectrum of 3f

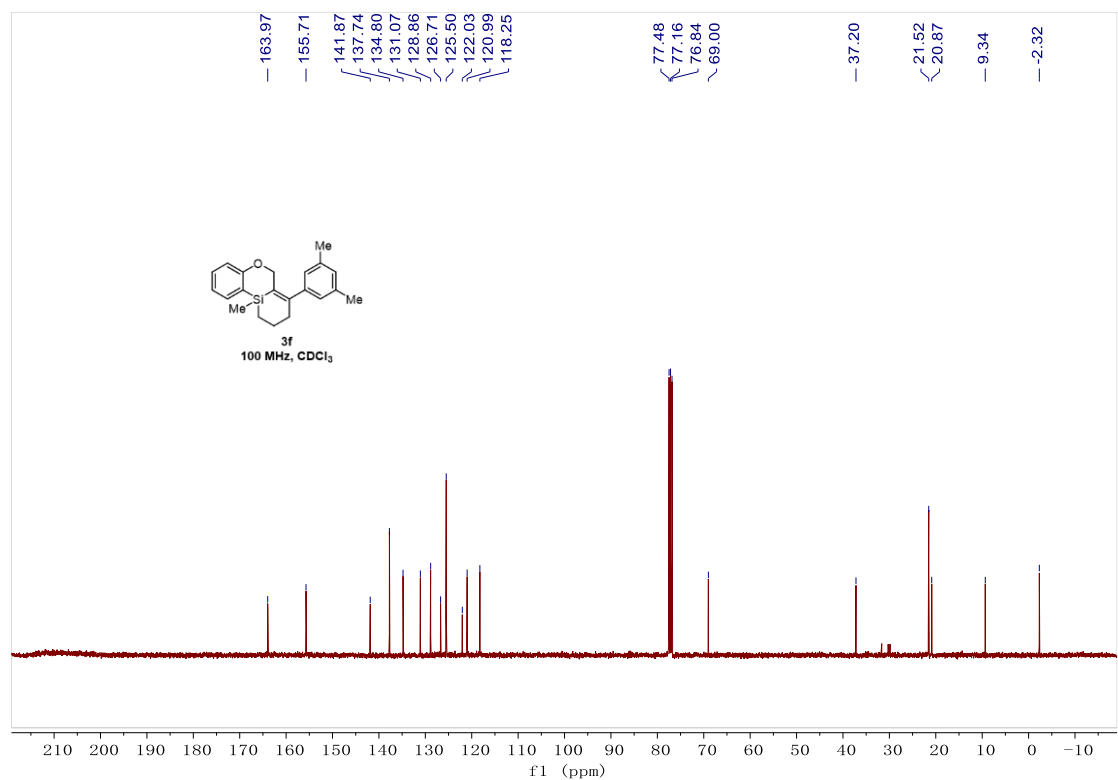

# <sup>1</sup>H NMR spectrum of 3g

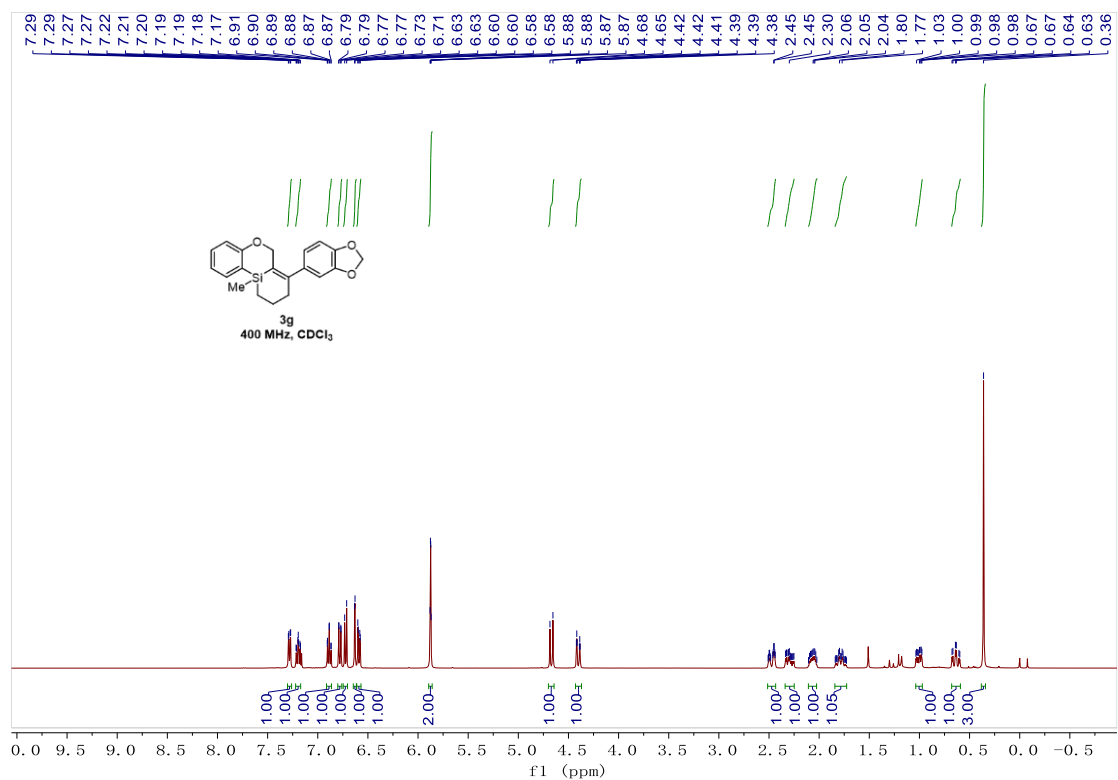

# <sup>13</sup>C NMR spectrum of 3g

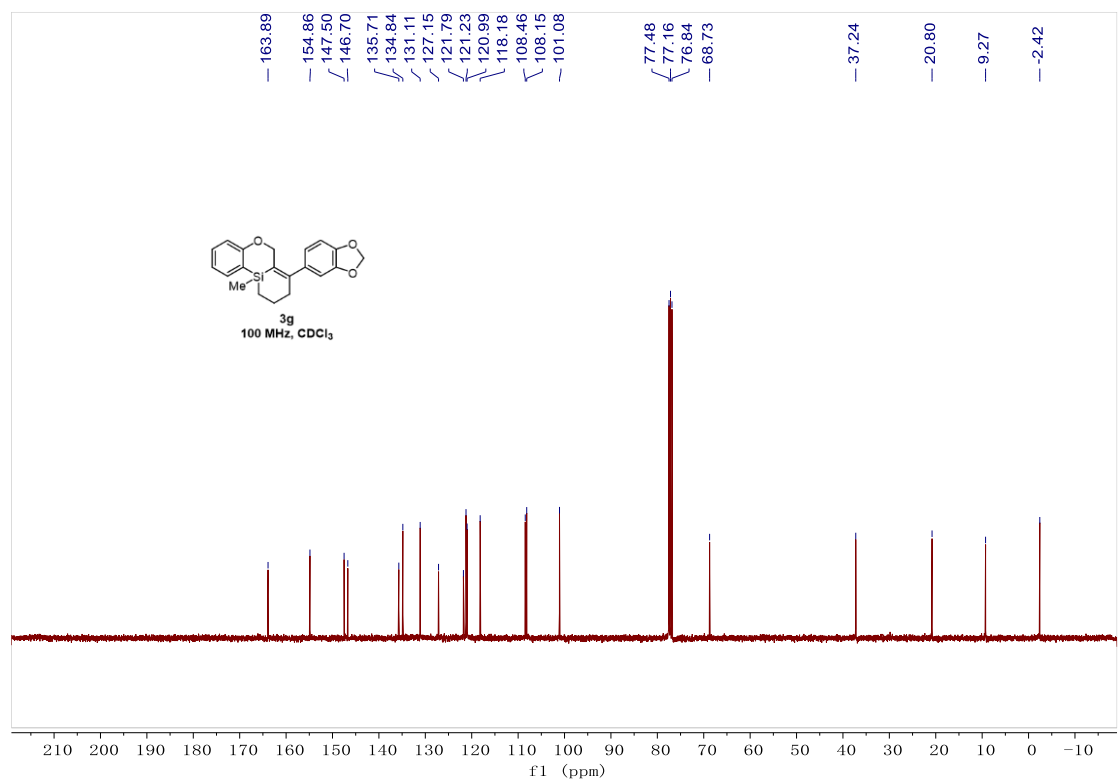

# <sup>1</sup>H NMR spectrum of 3h

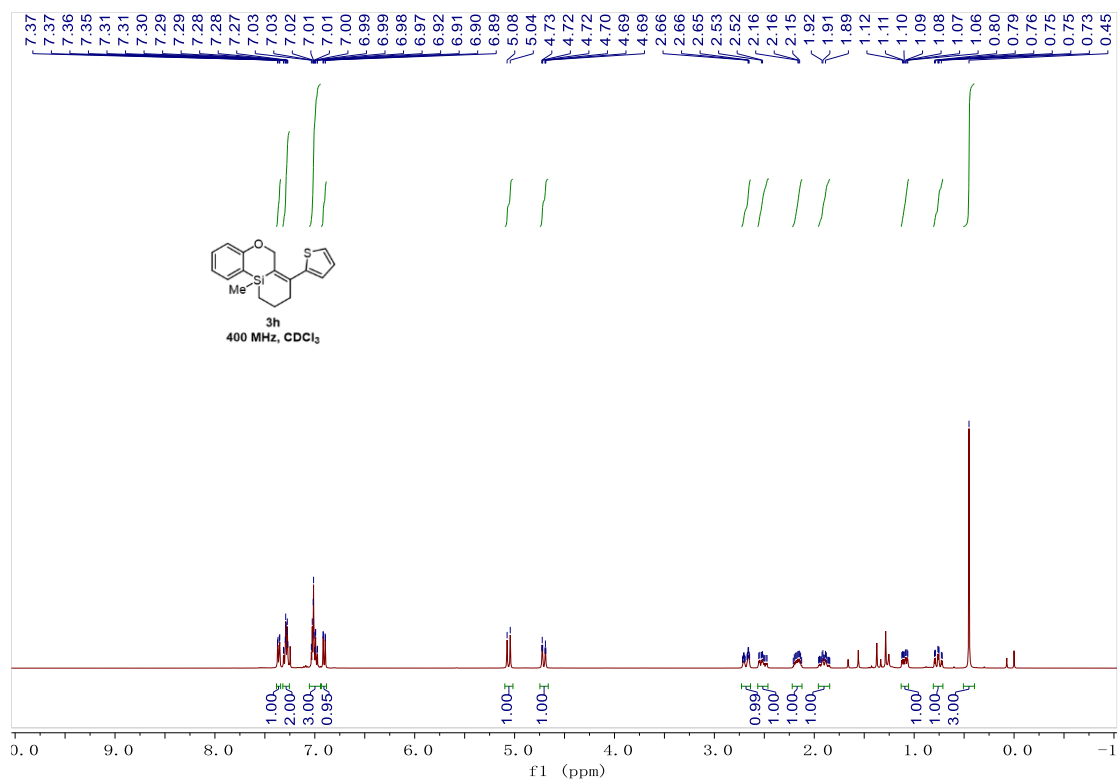

# <sup>13</sup>C NMR spectrum of 3h

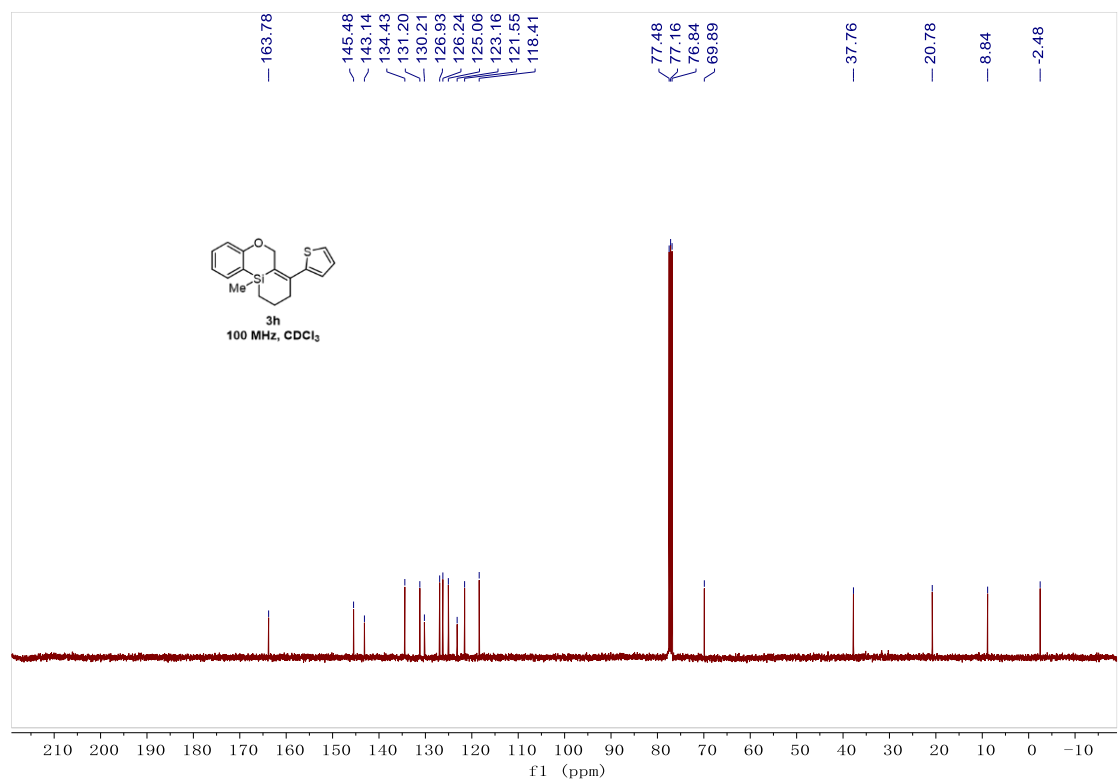

# <sup>1</sup>H NMR spectrum of 3i

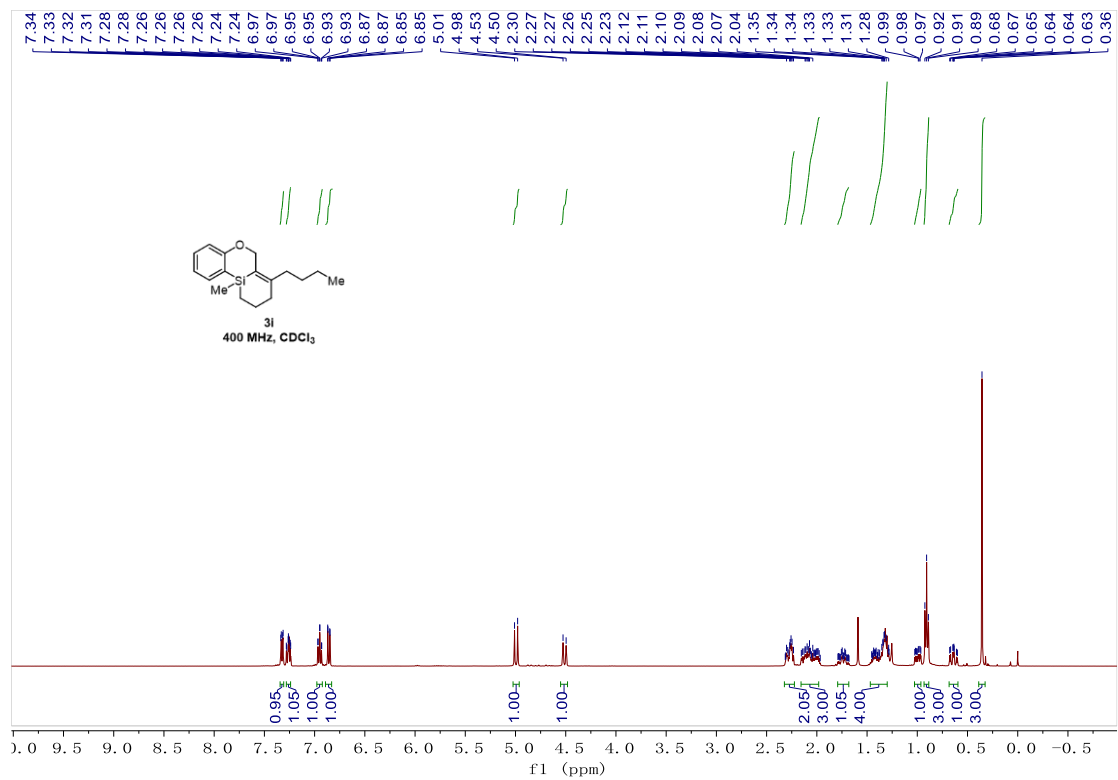

# <sup>13</sup>C NMR spectrum of 3i

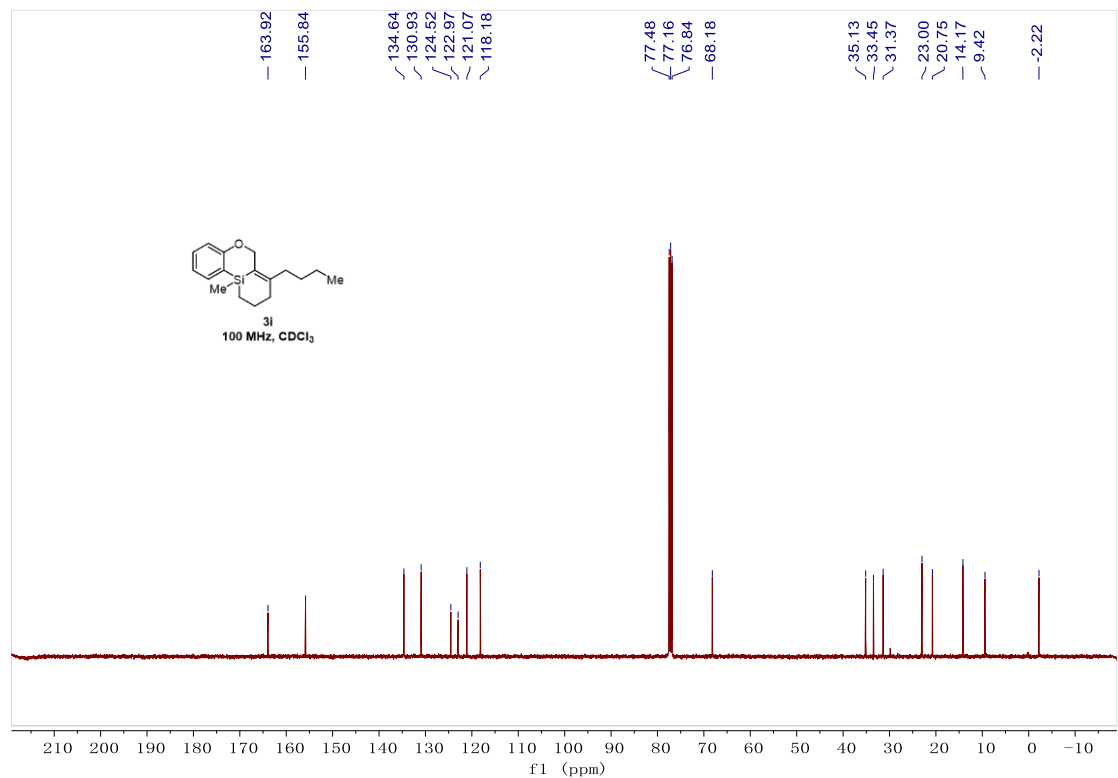

# <sup>1</sup>H NMR spectrum of 3j

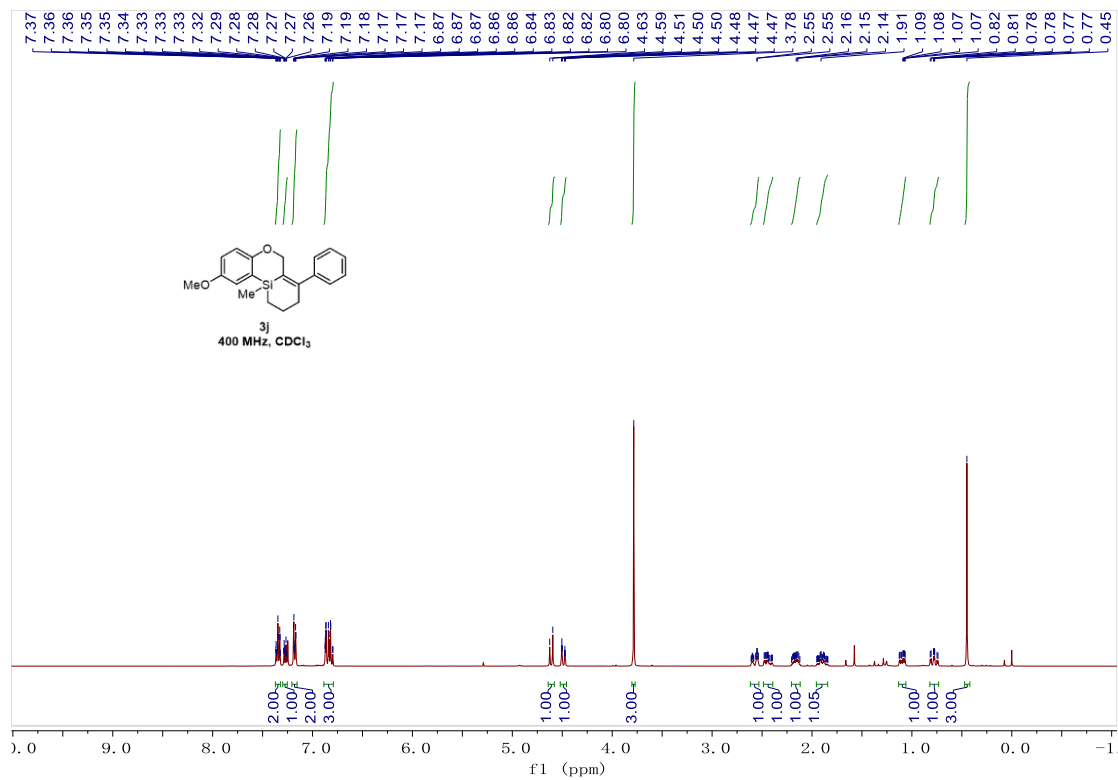

# <sup>13</sup>C NMR spectrum of 3j

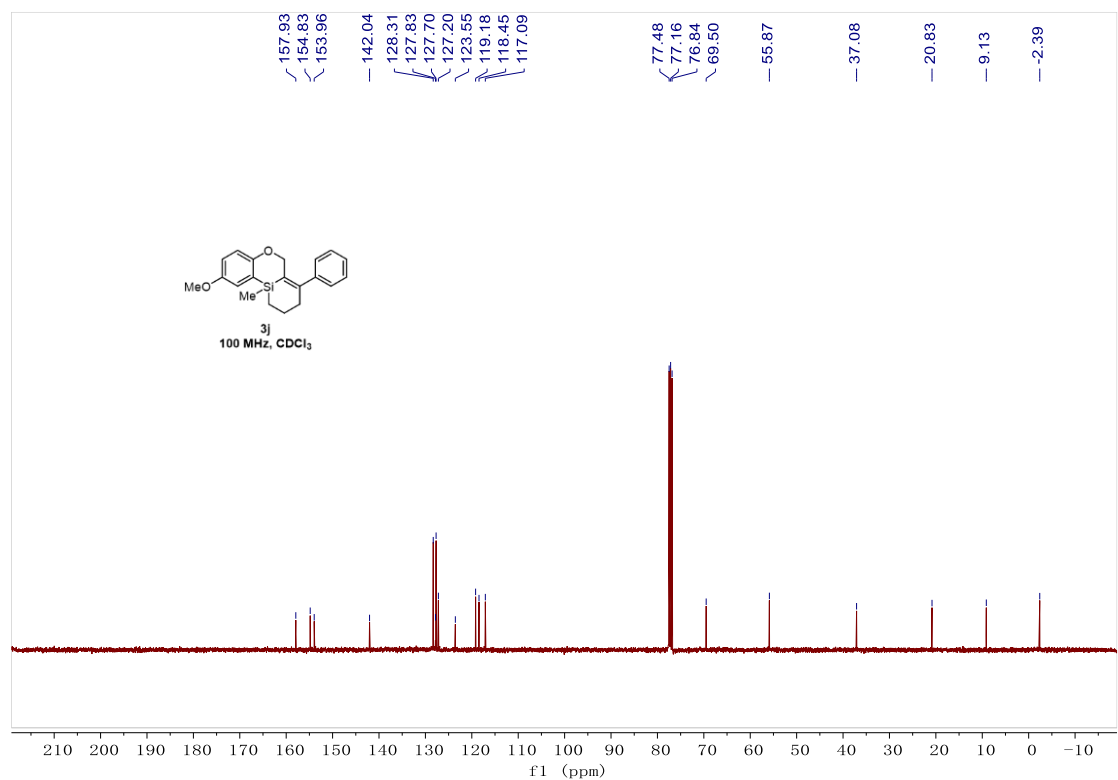



# <sup>1</sup>H NMR spectrum of 3k

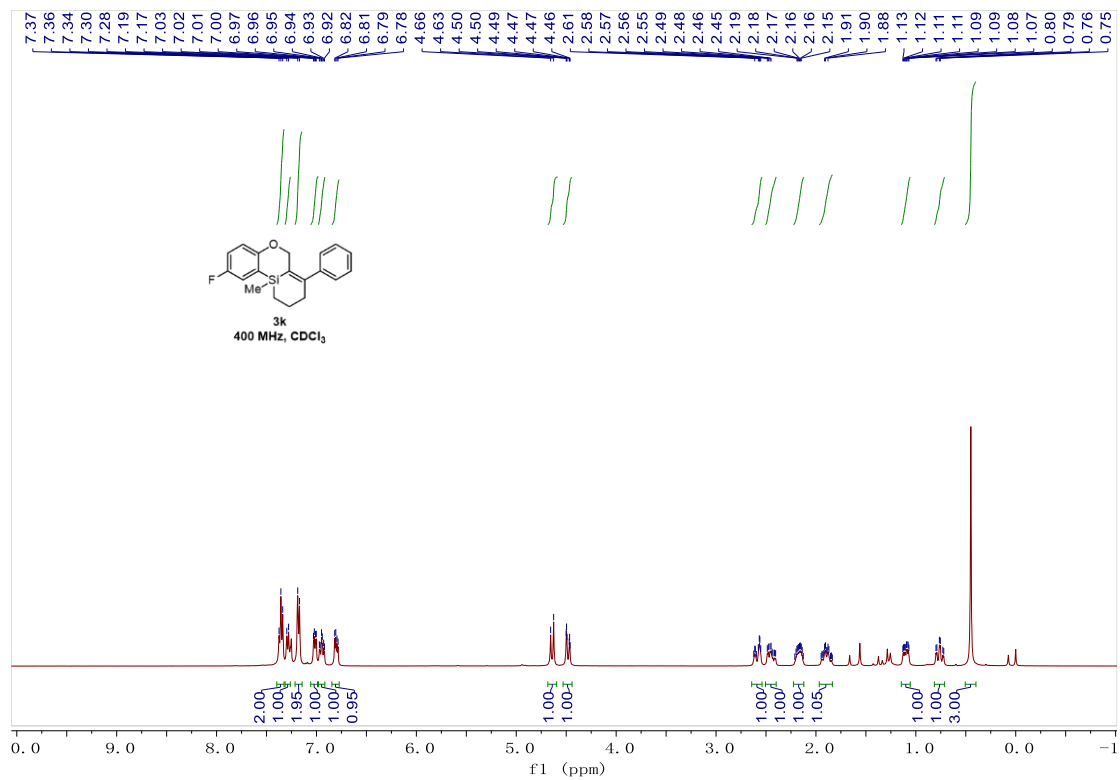

# <sup>13</sup>C NMR spectrum of 3k

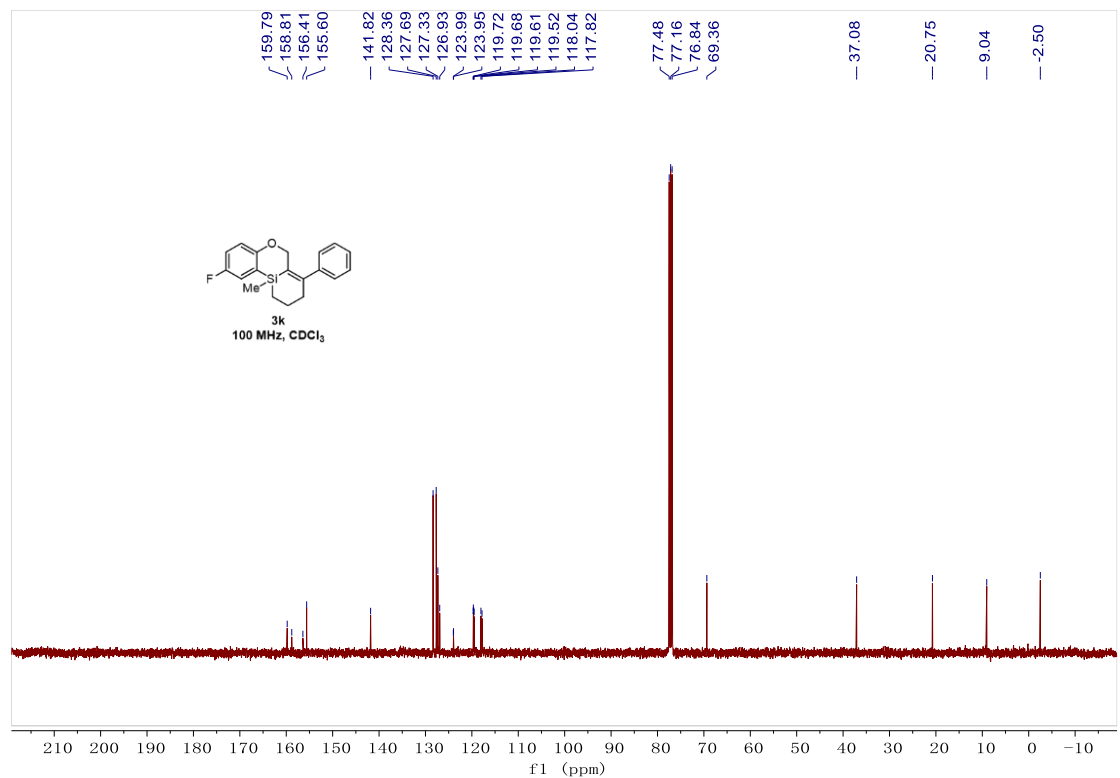

# <sup>19</sup>F NMR spectrum of 3k

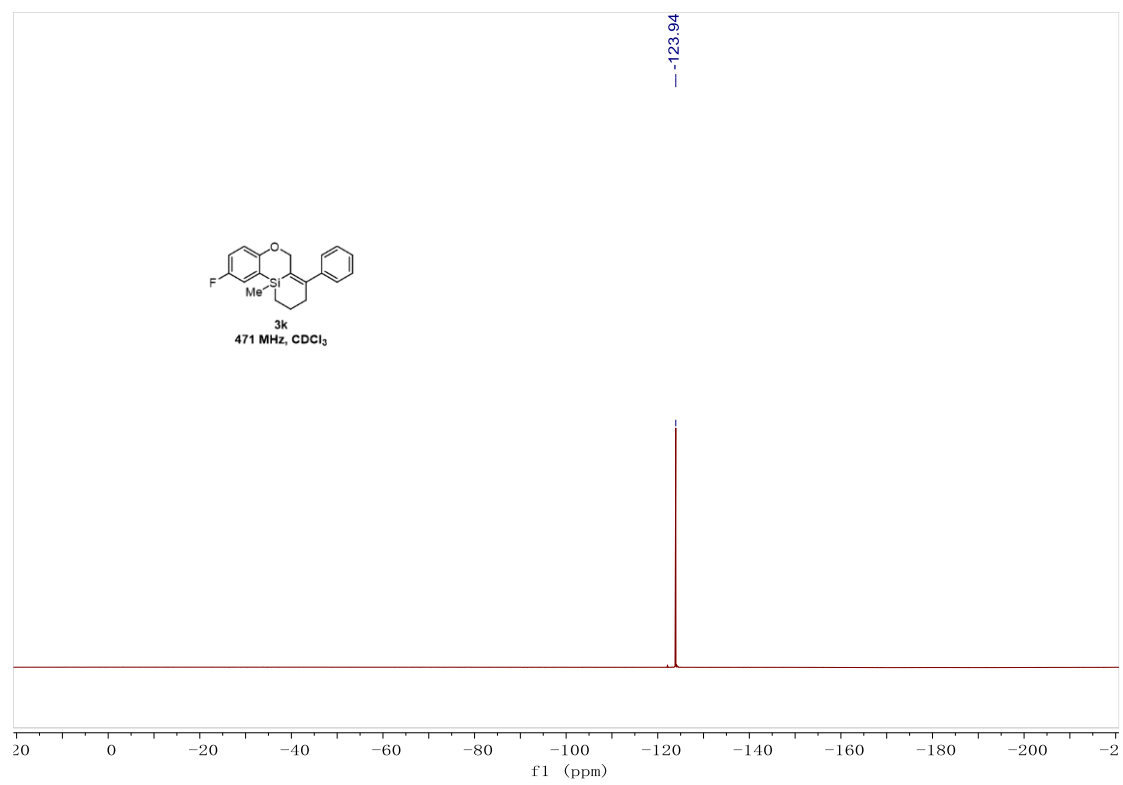

# <sup>1</sup>H NMR spectrum of 3I

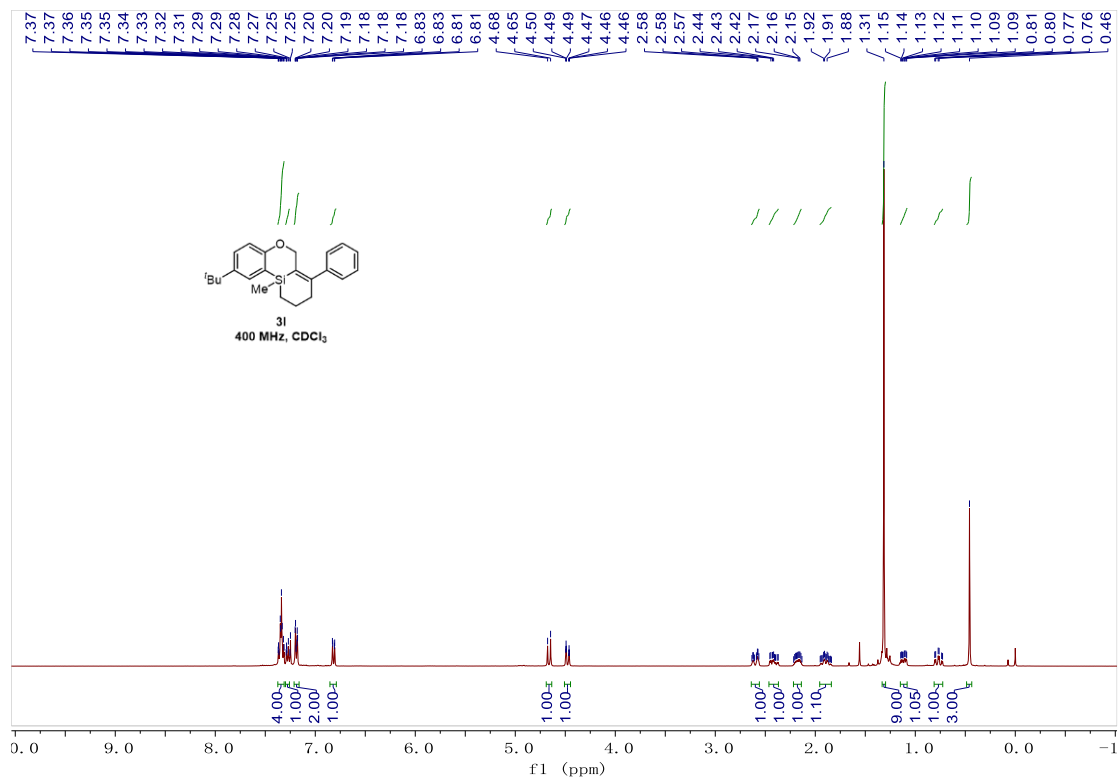

# <sup>13</sup>C NMR spectrum of 3I

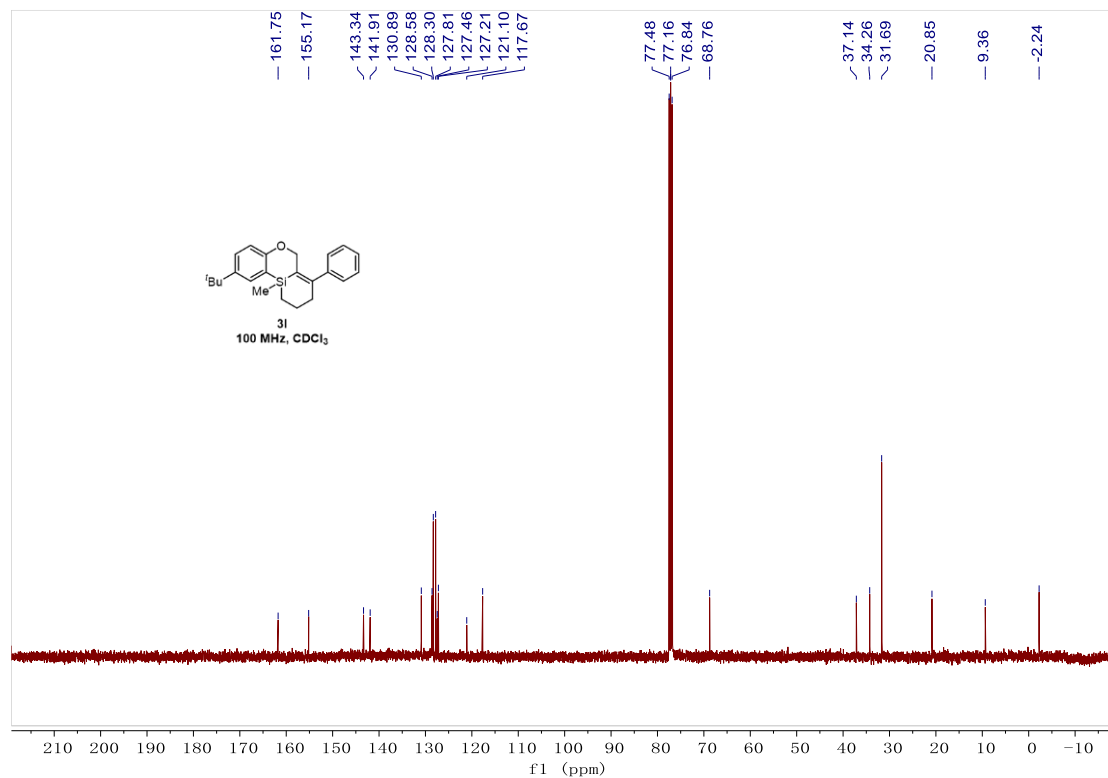

# <sup>1</sup>H NMR spectrum of 3m

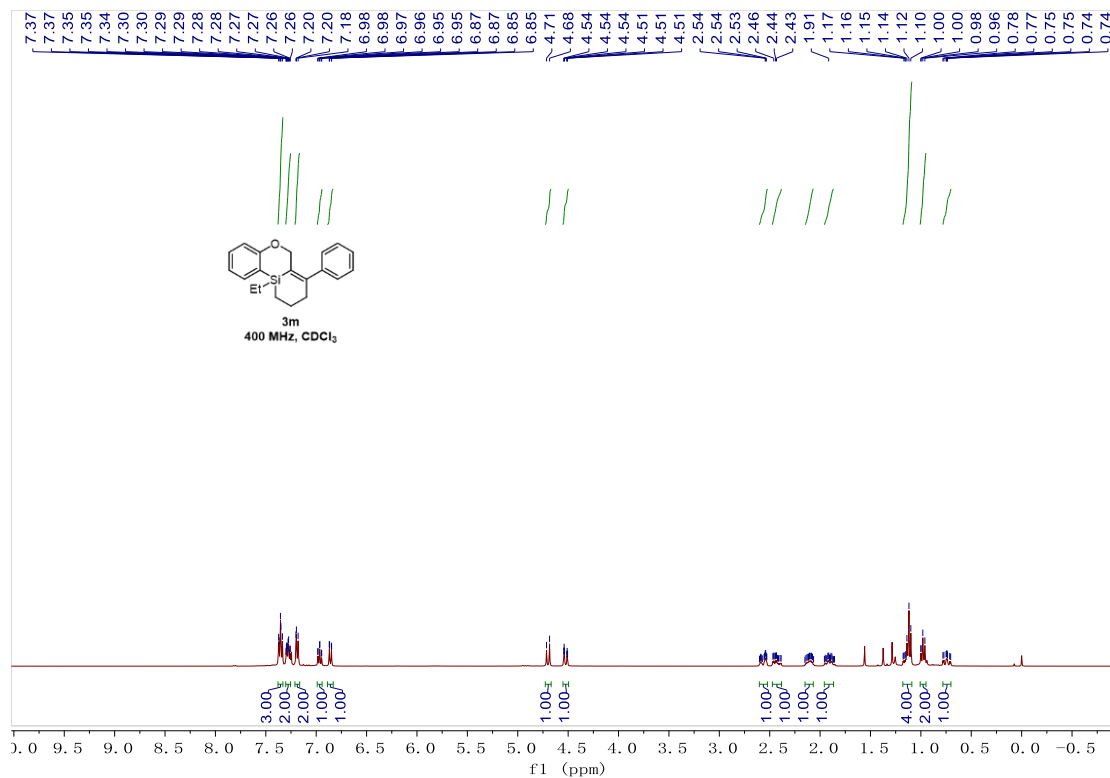

# <sup>13</sup>C NMR spectrum of 3m

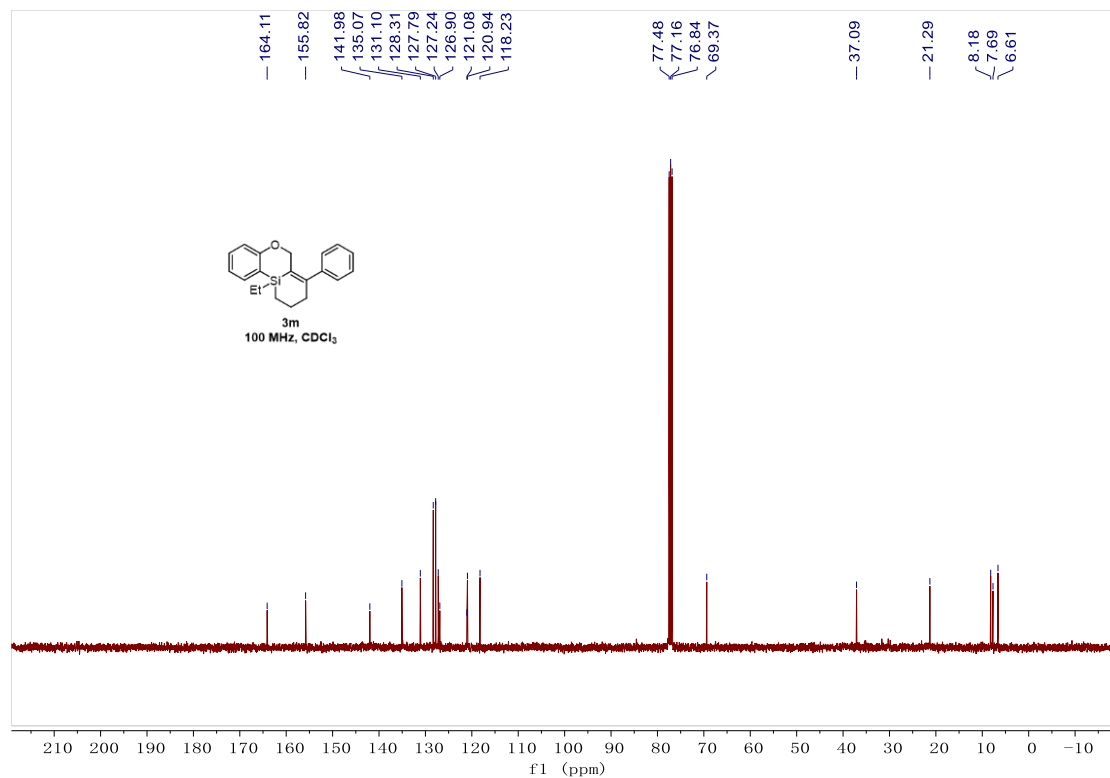



# <sup>1</sup>H NMR spectrum of 3o

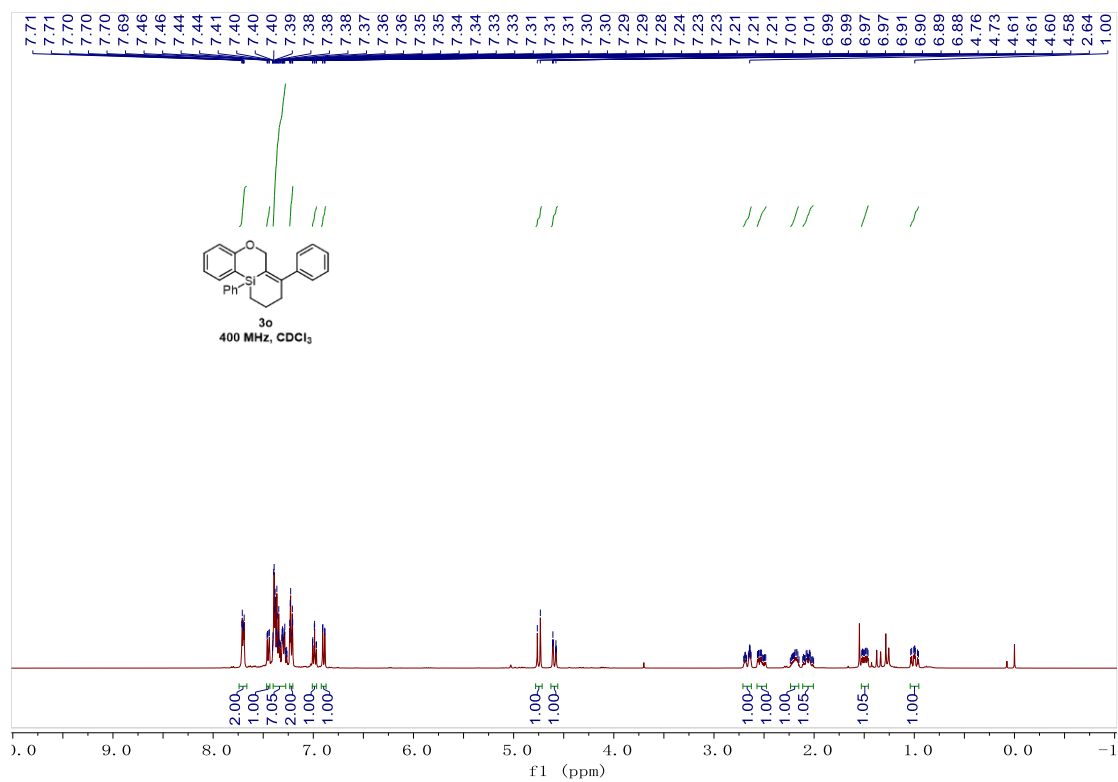

# <sup>13</sup>C NMR spectrum of 3o

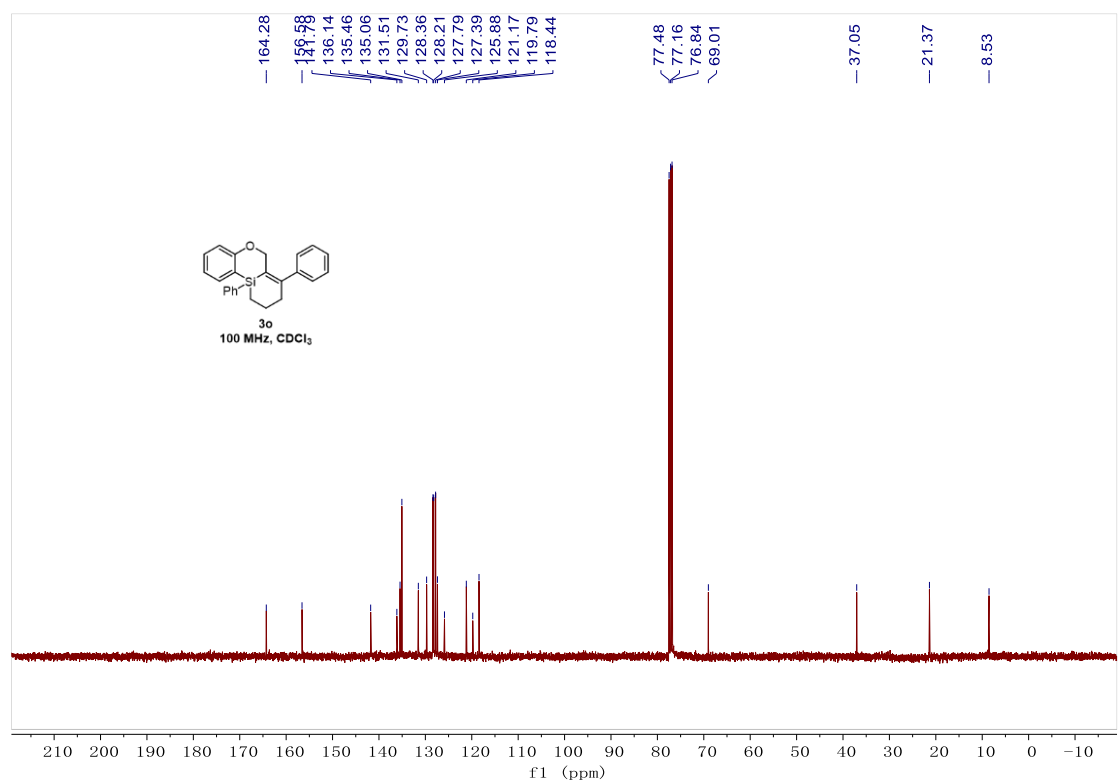

# <sup>1</sup>H NMR spectrum of 4a

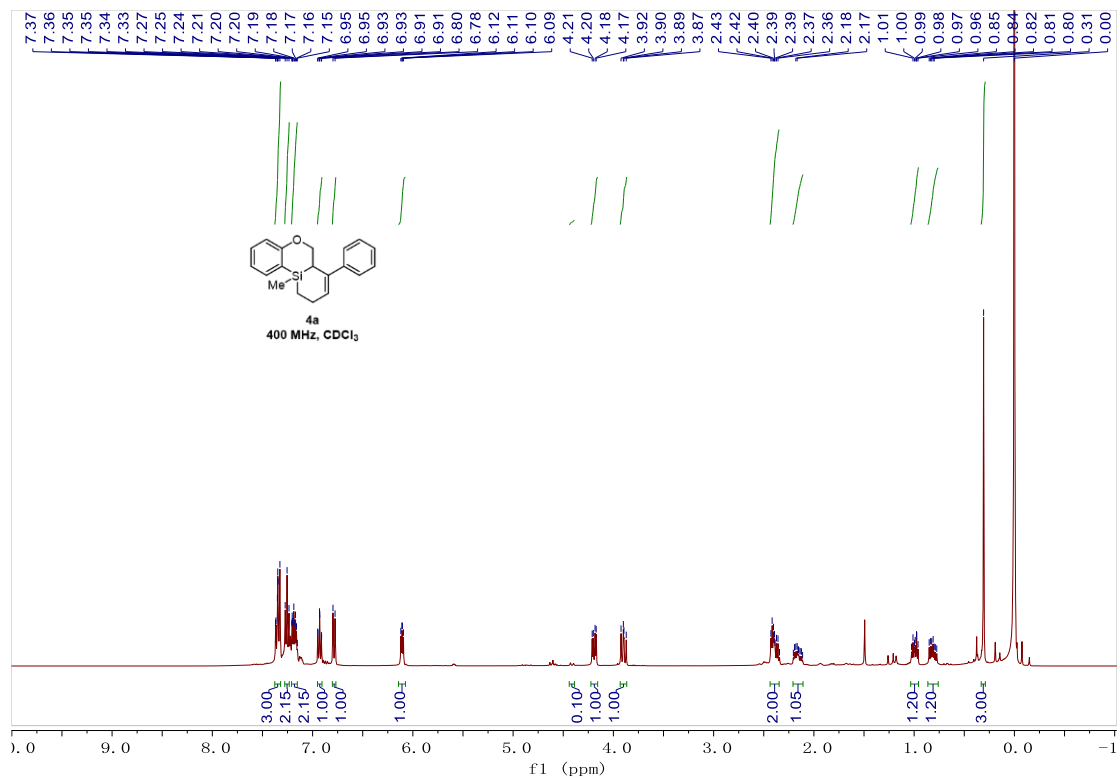

# <sup>13</sup>C NMR spectrum of 4a

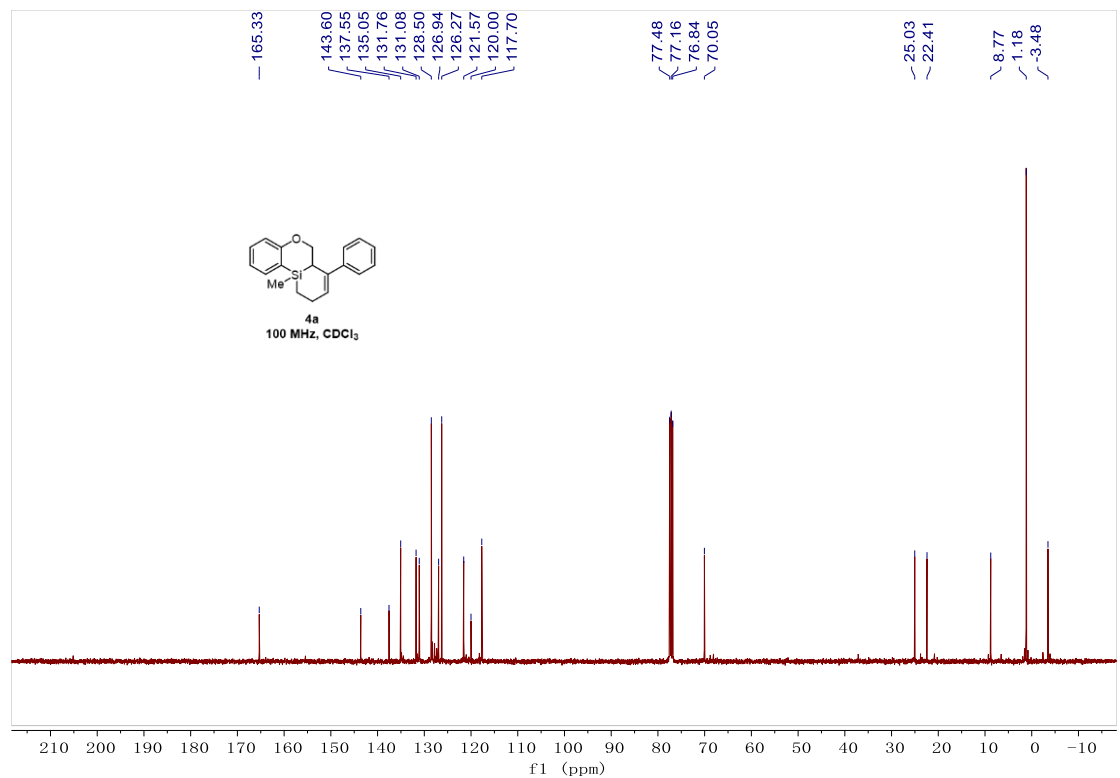

Supplement: d4qo02119c1.pdf [file d4qo02119c1.pdf]
